# Supplementary material for: Ultrasensitive fluorescence detection of nitro-explosives by dihydro-oxoisobenzofuranyl-phthalazinone obtained from the Cd(ii)-catalyzed cyclization of azinodimethylidyne-benzoic acid
Source: Royal Society of Chemistry journal article supplement (doi:10.1039/d2nj06277a), 2023-01-01
Supplement: d2nj06277a1.pdf [file d2nj06277a1.pdf]

## Supplementary Materials

### Ultrasensitive fluorescent detection of nitroexplosives by dihydro-oxoisobenzofuranyl-phthalazinone engendered from Cd(II) catalyzed cyclization of azinodimethylidyne-benzoic acid

Durgesh Singh<sup>a,b†</sup>, Subhash Chandra<sup>c</sup>, Rampal Pandey<sup>\*a</sup>

<sup>a</sup>Department of Chemistry, National Institute of Technology Uttarakhand-246174, India

<sup>b</sup>Department of Chemistry, Dr. Harisingh Gour University, Sagar, 470003 (MP), India

<sup>c</sup> Department of Chemistry, B.S.N.V P.G. College (K.K.V), Lucknow-226001, U.P, India

Corresponding Author's Email: [rppandey@gmail.com](mailto:rppandey@gmail.com)

### Table of Content

---

#### 1. Experimental

- 1.1. Reagents:
- 1.2. General methods.
- 1.3. Materials and Equipment
- 1.4. UV-vis and fluorescence Studies.
- 1.5. UV-vis titration in organic media
- 1.6. Photoluminescence measurements
- 1.7. Fluorescence quenching titration with NACs in aqueous media
- 1.8. Calculation of the Stern-Volmer constant
- 1.9. Quantum yield measurement

#### 2. Table and Figs

- 2.1. **Table S1** Crystal Data and Structure Refinements for **1**
- 2.2. **Table S2** Hydrogen-bond geometry (Å, °)
- 2.3. Crystal structure and weak bonding interaction study
- 2.4. **Fig. S1** FTIR Spectra of (B) ADMBA and (A) **1**
- 2.5. **Fig. S2** <sup>1</sup>H NMR Spectra of ADMBA
- 2.6. **Fig. S3** <sup>13</sup>C NMR Spectra of ADMBA
- 2.7. **Fig. S4** <sup>1</sup>H NMR Spectra of **1**
- 2.8. **Fig. S5** <sup>13</sup>C NMR Spectra of **1**
- 2.9. **Fig. S6.** Asymmetric unit of **1**
- 2.10. **Fig. S7** The molecular structure exhibiting the atom-numbering scheme.
- 2.11. **Fig. S8** Supramolecular network view of the title structure. Intermolecular hydrogen bonds are shown as green dotted dashed lines.
- 2.12. **Fig. S9** H···O–H hydrogen bonding interactions of the title structure. Intramolecular and intermolecular hydrogen bonds are shown as green dotted dashed lines.
- 2.13. **Fig. S10:** UV/vis Spectra of the ADMBA
- 2.14. **Fig. S11:** UV/vis Spectra of the **1**
- 2.15. **Fig. S12:** Reaction Kinetics in the presence of Zn(II) ions in different time interval.
- 2.16. **Fig. S13:** Reaction Kinetics in the presence of Ni(II) ions in different time interval.
- 2.17. **Fig. S14:** Reaction Kinetics in the presence of Cu(II) ions in different time interval.
- 2.18. **Fig. S15:** Reaction Kinetics in the presence of Co(II) ions in different time interval.
- 2.19. **Fig. S16:** Reaction Kinetics in the presence of Gd(II) ions in different time interval.
- 2.20. **Fig. S17:** Reaction Kinetics in the presence of Dy(II) ions in different time interval.
- 2.21. **Fig. S18:** Reaction Kinetics in the presence of Cd(II) ions in different time interval.
- 2.22. **Fig. S19:** Reaction Kinetics in the presence of La(II) ions in different time interval.
- 2.23. **Fig. S20:** Reaction Kinetics in the presence of Yb(II) ions in different time interval.
- 2.24. **Fig. S21** (A) and (B) UV/vis spectra of **1** in presence of nitroaromatics, phenols and aromatic amines in solvent containing molar ratio (DMF: CH<sub>3</sub>OH; 1:1).
- 2.25. **Fig. S22** Job's plot for the binding of **1** with (A) o-NP, and (B) with PA at λ<sub>(ab)</sub> 278 nm.
- 2.26. **Fig. S23** Fluorescence response of **1** (10 μM) toward various NACs, phenols and aniline derivatives (i.e. p-nitrophenol (**1**) o-nitrophenol (**2**), m-nitrophenol (**3**), 3-Methoxyphenol (**4**), 2-Isopropylphenol (**5**), 2,4,6-Trinitrophenol (**6**), 2,4-Dibromophenol (**7**), 3-

# Supplementary Materials

- Chlorophenol (**8**), 2,4,6-Trichlorophenol (**9**), 2,4-Dichlorophenol (**10**), Quinol (**11**), Phenol (**12**), Resorcinol (**13**), 4-Chloroaniline (**14**), Tertbutylaniline (**15**), 2-Chloroaniline (**16**), 2,4-Difluoroaniline (**17**) and aniline (**18**) ( $\lambda_{\text{ex}} = 300 \text{ nm}$ ).
- 2.27. **Fig. S24** Polynomial and Linear Fitted curve of **1** ( $F_0/F$ ) Vs Concentration (A) by adding successive concentrations of o-NP and **1** (B) by adding successive concentrations of PA.
- 2.28. **Fig. S25** Polynomial and Linear Fitted Stern-Volmer curve ( $F_0/F$ )-1 Vs Concentration of **1** (A) by adding successive concentrations of o-NP and probe-2 (B) by adding successive concentrations of PA.
- 2.29. **Fig.: S26** Benesi–Hildebrand plot for binding of **1** with (A) o-NP and (B) PA.
- 2.30. **Fig.: S27** UV/vis spectra (A) and Fluorescence spectra (B) of Probe **1** in presence of various metal ions in the solvent containing molar ratio (DMF/H<sub>2</sub>O; 6:4,v/v).
- 2.31. **Scheme S1.** Guests **6** used in this study
- 2.32. **Fig. S28** Bar diagram showing interference of various cations, phenols and amines in binding of **1** with o-NP/PA in way (addition of analytes to the solution of 1+o-NP+analytes/1+PA+analytes).
- 2.33. **Table S3** Fractional atomic coordinates and isotropic or equivalent isotropic displacement parameters ( $\text{\AA}^2$ )
- 2.34. **Table S4** Atomic displacement parameters ( $\text{\AA}^2$ )
- 2.35. **Table S5** Geometric parameters ( $\text{\AA},^\circ$ )
- 2.36. **Table S6** Major Peak profiles and its  $2\theta / (\text{Degree})$  corresponding with Indexing of (h.k.l.) value of Probe **2**.
- 2.37. **Fig. S29** Experimental PXRD pattern of **1** matching with its simulated PXRD patterns obtained from single crystal-XRD data.
- 2.38. **Fig. S30** Absorption spectra of electron deficient nitro-explosives (A) o-NP ; (B) PA and emission spectra of Probe **1**.
- 2.39. **Fig. S31** Picture showing distinct color change from colorless to pink of **1** (10  $\mu\text{M}$ ) in presence of various analytes in mixed DMF/H<sub>2</sub>O media (6:4, v/v).
- 2.40. **Fig. S32** Picture showing distinct color change from colorless to pink of **1** (10  $\mu\text{M}$ ) in presence of Picric Acid and orthonitrophenol in mixed DMF/H<sub>2</sub>O media (6:4, v/v).

## 1. Experimental

- 1.1. Reagents:** To perform the experiment work we used analytical grade solvents were first dried and then distilled by usual procedures prior to use.<sup>1</sup> Solvents like distilled water, absolute ethanol, diethyl ether, dichloromethane were obtained from HiMedia Chemicals Ltd. The reagents, 2- carboxybenzaldehyde and hydrazine monohydrate were procured from Sigma Aldrich Pvt. Ltd. Metal nitrates like NaNO<sub>3</sub>, Ca(NO<sub>3</sub>)<sub>2</sub>·4H<sub>2</sub>O, KNO<sub>3</sub>, Mg(NO<sub>3</sub>)<sub>2</sub>·6H<sub>2</sub>O, Mn(NO<sub>3</sub>)<sub>2</sub>·4H<sub>2</sub>O, Fe(NO<sub>3</sub>)<sub>2</sub>·9H<sub>2</sub>O, Co(NO<sub>3</sub>)<sub>2</sub>·6H<sub>2</sub>O, Cu(NO<sub>3</sub>)<sub>2</sub>·3H<sub>2</sub>O, Ni(NO<sub>3</sub>)<sub>2</sub>·6H<sub>2</sub>O, Cd(NO<sub>3</sub>)<sub>2</sub>·4H<sub>2</sub>O, Zn(NO<sub>3</sub>)<sub>2</sub>·6H<sub>2</sub>O, AgNO<sub>3</sub>, Pb(NO<sub>3</sub>)<sub>2</sub>, Hg(NO<sub>3</sub>)<sub>2</sub>·H<sub>2</sub>O, Gd(NO<sub>3</sub>)<sub>3</sub>·xH<sub>2</sub>O, Dy(NO<sub>3</sub>)<sub>2</sub>·xH<sub>2</sub>O, La(NO<sub>3</sub>)<sub>2</sub>·xH<sub>2</sub>O and Yb(ac)<sub>3</sub>·xH<sub>2</sub>O were used as a source of metal ions which were also obtained from Sigma Aldrich. p-nitrophenol(**1**) o-nitrophenol(**2**), m-nitrophenol(**3**), 3-Methoxyphenol(**4**), 2-Isopropylphenol(**5**), 2,4,6-Trinitrophenol(**6**), 2,4-Dibromophenol(**7**), 3-Chlorophenol (**8**), 2,4,6-Trichlorophenol(**9**), 2,4-Dichlorophenol(**10**), Quinol(**11**), Phenol(**12**), Resorcinol(**13**), 4-Chloroaniline (**14**), Tertbutylaniline(**15**), 2-Chloroaniline(**16**), 2,4 - Difluoroaniline(**17**) and Aniline(**18**) were used as a source of NAC's and analytes ions which were procured from Alfa Aesar.
- 1.2. General methods.** The elemental analysis of **1** was acquired on Exeter Analytical Inc. model CE-440 CHN analyzer. FT-IR spectral analysis was obtained from Shimadzu FT-IR spectrometer using KBr pallets (4000–400  $\text{cm}^{-1}$ ) and electronic absorption spectra were procured from Systronics double beam UV-Vis Spectrophotometer: 2201. <sup>1</sup>H (500 MHz) and <sup>13</sup>C (500 MHz) were obtained from Bruker and Jeol delta-2 spectrometers, respectively using DMSO<sub>6</sub> as a solvent and tertamethylsilane (TMS) as an internal reference material. In NMR the chemical shift values are mentioned in parts per million (ppm). Fluorescence spectra were recorded on Fluorescence spectrophotometer RF-5301.
- 1.3. Materials and Equipment** Melting point was uncorrected. The NMR spectra were performed on a Bruker 400 MHz or 600 MHz spectrometer. The chemical shifts ( $\delta$ ) in <sup>1</sup>H NMR were reported relative to tetramethylsilane (Me<sub>4</sub>Si) as internal standard ( $\delta$  0.0)

## Supplementary Materials

or proton resonance resulting from incomplete deuteration of NMR solvent: CDCl<sub>3</sub> ( $\delta$  7.26) or DMSO-d<sub>6</sub> ( $\delta$  2.50). Coupling constants (J) are expressed in hertz. <sup>13</sup>C NMR spectra were recorded at 100 MHz or 125 MHz, and the chemical shifts ( $\delta$ ) were reported relative to CDCl<sub>3</sub> ( $\delta$  77.10) or DMSO-d<sub>6</sub> ( $\delta$  40.50). Elemental analysis of carbon, nitrogen and hydrogen was performed using an Elementary Vario EL analyzer. UV-vis spectra were recorded using a SHIMADZU UV-2550 spectrometer. Emission spectra were recorded using a Hitachi F-4600 fluorescence spectrophotometer. All solvents were purchased from Sinopharm and used without further purification unless otherwise denoted. Tetrahydrofuran, ethanol, and acetonitrile were further dried over calcium hydride, and distilled under high vacuum just before use. All chemicals were purchased from Aladdin, Aldrich, Alfa Aesar and Sinopharm, and were used as received

**1.4. UV-vis and fluorescence Studies.** To perform the absorption and emission spectral studies 10  $\mu$ M stock solution of **1** was prepared in DMF/H<sub>2</sub>O (6: 4, v/v) media. Solutions of metal ions namely Li<sup>+</sup>, Na<sup>+</sup>, K<sup>+</sup>, Mg<sup>2+</sup>, Ca<sup>2+</sup>, Fe<sup>2+</sup>, Fe<sup>3+</sup>, Co<sup>2+</sup>, Ni<sup>2+</sup>, Cu<sup>2+</sup>, Zn<sup>2+</sup>, Cd<sup>2+</sup>, Hg<sup>2+</sup>, Ag<sup>+</sup> and Pb<sup>2+</sup> and NAC's p-nitrophenol(**1**) o-nitrophenol(**2**), m-nitrophenol(**3**), 3-Methoxyphenol(**4**), 2-Isopropylphenol(**5**), 2,4,6-Trinitrophenol(**6**), 2,4-Dibromophenol(**7**), 3-Chlorophenol (**8**), 2,4,6-Trichlorophenol(**9**), 2,4-Dichlorophenol(**10**), Quinol(**11**), Phenol(**12**), Resorcinol(**13**), 4-Chloroaniline (**14**), Tertbutylaniline(**15**), 2-Chloroaniline(**16**), 2,4-Difluoroaniline(**17**) and Aniline(**18**) of concentration 100  $\mu$ M (for individual addition) and 10  $\mu$ M (for titration experiments) were prepared from their nitrate salts in double distilled water and their stock solution used as a source of metal ions. A 2.5 mL solution of **1** was taken in a quartz cell with 1 cm optical path length. The fluorescence experiments at rt were recorded with excitation ( $\lambda_{ex}$ ) of **1** at 480 nm. In a typical titration, metal ions in fixed fractions were gradually added with the help of micropipette to a solution of **1** followed by thorough mixing.

**1.5. UV-vis titration in organic media** The UV-vis titrations of ligand L with o-NP and PA in organic solvents were carried out by placing 2 mL DMF solution of ligand ( $1.0 \times 10^{-5}$  mol•L<sup>-1</sup>) in a quartz cuvette of 1 cm width. At 25 °C, the dilute solution of o-NP and PA in methanol ( $1.0 \times 10^{-5}$  mol•L<sup>-1</sup>) was added in an incremental fashion. The absorption of additives was deducted through adding the solution of additives into the cuvettes of sample solution and background solvent simultaneously before measurement.

**1.6. Photoluminescence measurements** For fluorescence measurements, **1** were excited at their  $\lambda_{max}$  of UV absorption and their emissions were monitored within the suitable region while keeping 5.0 nm slit width for both source and detector at 400 V voltage.

**1.7. Fluorescence quenching titration with NACs in aqueous media** The fluorescence quenching titrations with different NACs in aqueous media were carried out by placing 2 mL aqueous solution of probe (**2**) in a quartz cuvette of 1 cm width. Then, the aqueous or methanol solution of several NACs was added in an incremental fashion at 25 °C. Probe (**2**) was excited at their  $\lambda_{max}$  of UV absorption and their emissions were monitored within the suitable region while keeping 10.0 nm slit width for both source and detector and voltage as 700 V. The fluorescence quenching efficiency ( $\eta$ ) for each of NACs was calculated by the following equation:

$$\eta = (F_0 - F) / F_0 \times 100\%$$

F<sub>0</sub> and F are the fluorescence intensities in the absence and presence of NACs, respectively.

**1.8. Calculation of the Stern-Volmer constant** The sensitivity of two polymers toward PA was estimated from the Stern-Volmer constant (K<sub>SV</sub>). The Stern-Volmer plots were plotted as a function of the PA concentration ([C]) in the following equation:

$$F_0/F - 1 = K_{sv} \times [C]$$

Thus, K<sub>sv</sub> can be calculated from the slope of the linear Stern-Volmer plot obtained at low concentration range of o-NP and PA.

# Supplementary Materials

## 1.9. Quantum yield measurement

Fluorescence quantum yields ( $\Phi_F$ ) were determined by steady state comparative method using following Equation:

$$\phi_s = \phi_1 \frac{F_s A_1 (n_1)^2}{F_1 A_s (n_s)^2}$$

$F_1$  and  $F_s$  are the areas under the fluorescence curves of the Probe **1** and the reference, respectively.  $A_1$  and  $A_s$  are the absorbance of the sample and reference at the excitation wavelength, and  $n_1$  and  $n_s$  are the refractive indices of solvents used for the sample and standard, respectively.<sup>2-6</sup>

Reference used fluorescein standard yield ( $\Phi_F = 0.79$ ).<sup>7</sup>

Refractive Index of mixed DMF + water (6:4, v/v) = 1.455.

## 2. Table and Figs

|                                                                             |                                                               |
|-----------------------------------------------------------------------------|---------------------------------------------------------------|
| <b>Empirical Formula</b>                                                    | <b>C<sub>16</sub>H<sub>10</sub>N<sub>2</sub>O<sub>3</sub></b> |
| <b>Formula weight</b>                                                       | 278.26                                                        |
| <b>Crystal system</b>                                                       | Triclinic                                                     |
| <b>Space group</b>                                                          | P <sub>1</sub>                                                |
| <b>Shape and Color</b>                                                      | Block like, colorless                                         |
| <b>a (Å)</b>                                                                | 7.222 (3) Å                                                   |
| <b>b (Å)</b>                                                                | 8.023 (3) Å                                                   |
| <b>c (Å)</b>                                                                | 11.178 (4) Å                                                  |
| <b>α (°)</b>                                                                | 80.103 (11)°                                                  |
| <b>β (°)</b>                                                                | 86.160 (11)°                                                  |
| <b>γ (°)</b>                                                                | 88.646 (13)°                                                  |
| <b>V (Å<sup>3</sup>)</b>                                                    | 636.5 (4) Å <sup>3</sup>                                      |
| <b>Z</b>                                                                    | 2                                                             |
| <b>Radiation type</b>                                                       | Mo Kα                                                         |
| <b>D<sub>calc</sub>(Mg m<sup>-3</sup>)</b>                                  | 1.452 Mg m <sup>-3</sup>                                      |
| <b>Mo Kα radiation, λ</b>                                                   | 0.71073 Å                                                     |
| <b>μ(mm<sup>-1</sup>)</b>                                                   | 0.10 mm <sup>-1</sup>                                         |
| <b>F(000)</b>                                                               | 288                                                           |
| <b>θ</b>                                                                    | 1.9–25.0°                                                     |
| <b>θ<sub>min</sub>, θ<sub>max</sub> (°)</b>                                 | 25.0°, 1.9°                                                   |
| <b>h<sub>min</sub>–max</b>                                                  | –8 8                                                          |
| <b>k<sub>min</sub>–max</b>                                                  | –9 9                                                          |
| <b>l<sub>min</sub>–max</b>                                                  | –13 13                                                        |
| <b>Dimension</b>                                                            | 0.36 × 0.28 × 0.22 mm                                         |
| <b>T</b>                                                                    | 296 K                                                         |
| <b>No. of measured, independent and observed [I &gt; 2σ(I)] reflections</b> | 10286, 2236, 1828                                             |
| <b>T<sub>min</sub>, T<sub>max</sub></b>                                     | 0.698, 0.746                                                  |
| <b>(sin θ/λ)max (Å<sup>-1</sup>)</b>                                        | 0.595                                                         |
| <b>Data / restraints / parameters</b>                                       | 2236/0/190                                                    |
| <b>wR2[I &gt; 2σ(I)]</b>                                                    | 1828                                                          |
| <b>R<sub>int</sub></b>                                                      | 0.031                                                         |
| <b>CCDC</b>                                                                 |                                                               |
| <b>R[F<sup>2</sup> &gt; 2σ(F<sup>2</sup>)]</b>                              | 0.040                                                         |
| <b>wR(F<sup>2</sup>)</b>                                                    | 0.142                                                         |
| <b>S</b>                                                                    | 1.11                                                          |
| <b>(Δ/σ)<sub>max</sub></b>                                                  | < 0.001                                                       |
| <b>Δρ<sub>max</sub>, Δρ<sub>min</sub> (e Å<sup>-3</sup>)</b>                | 0.18 e Å <sup>-3</sup> , –0.20 e Å <sup>-3</sup>              |
| <b>GOF on F<sup>2</sup></b>                                                 | 1.114                                                         |

**Table S1** Crystal Data and Structure Refinements for **1**

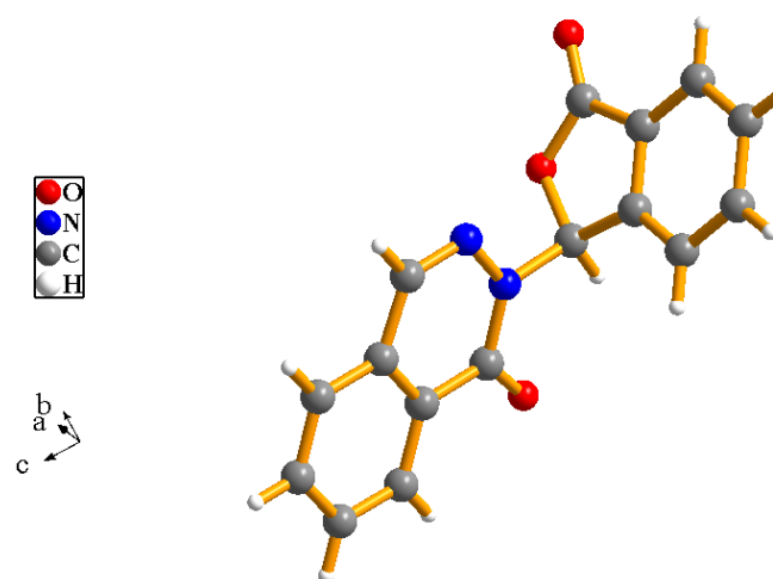

$$w = 1/[\sigma^2(F_o^2) + (0.0919P)^2 + 0.0297P]; \text{ where } P = (F_o^2 + 2F_c^2)/3$$

# Supplementary Materials

**Table S2 Hydrogen-bond geometry (Å,°)**

| $D-H\cdots A$                    | $D-H$ | $H\cdots A$ | $D\cdots A$ | $D-H\cdots A$ |
|----------------------------------|-------|-------------|-------------|---------------|
| C16—H16 $\cdots$ O3 <sup>i</sup> | 0.93  | 2.41        | 3.2935 (19) | 158           |
| C4—H4 $\cdots$ O1 <sup>ii</sup>  | 0.93  | 2.54        | 3.215 (2)   | 130           |

Symmetry codes: (i)  $x+1, y, z$ ; (ii)  $x, y-1, z$ .

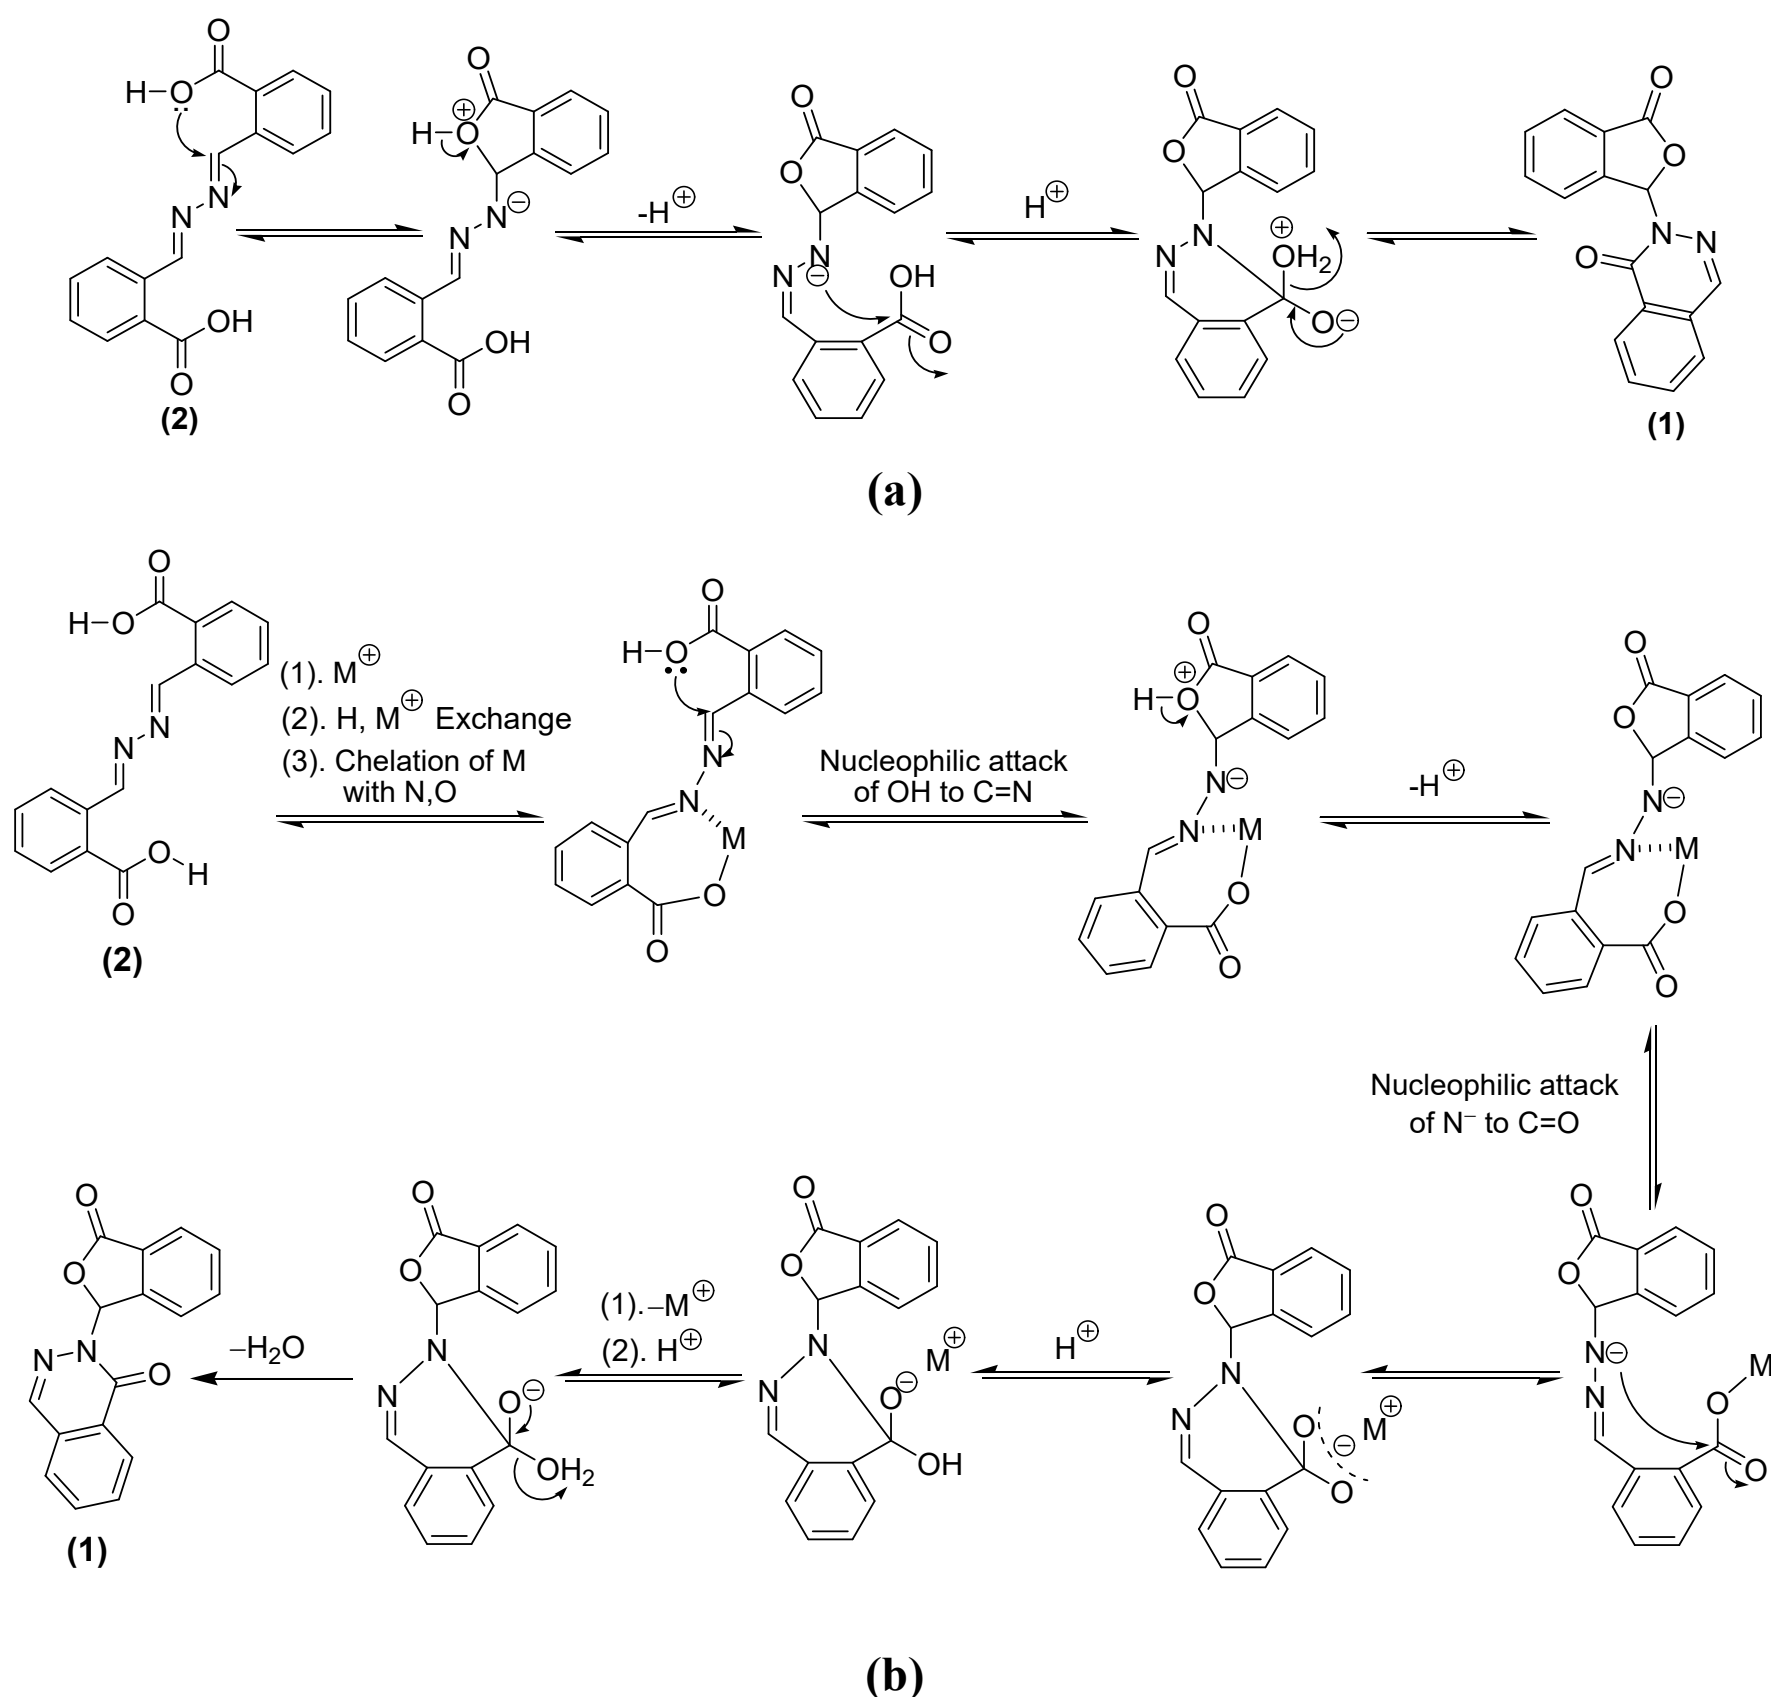

**Scheme S1.** Proposed Mechanism for (a) Self-cyclization route and (b) metal-catalyzed cyclization, for the formation of **1** from that of **2**.

## Crystal structure and weak bonding interaction study

In this work, we chose 2-carboxybenzaldehyde and hydrazine monohydrate as reagents to form **2,2'-(Azinodimethyldiyne) bis-benzoic Acid** and Resulting ligand was treated with different metals to form CPs/MOFs due to having carboxylate groups are present in the linker but unexpected heterocyclic product was formed namely **2-(1,3-dihydro-1-oxoisobenzofuran-3-yl)phthalazin-1(2H)-one**. (Özbeý et al., 1998). The title compound's molecular structure is depicted in Fig. 1. The C9—C10—C11— N1 and N2—C14—C15—C16 torsion angles are -175.9 (2) and 178.0 (2) degrees, respectively, in the phthalazine system. The C8—C6—C5 O2 torsion angle of the phthalide ring structure is -176.68 (2)°, making this one almost planar. The length of the N1—C8 bond 1.448 (2) shows single bond character, and the associated bond angles reveal that

## Supplementary Materials

the C8 atom is  $sp^3$  (chiral centre). The phthalazine ring's C16—N2 bond length 1.288 (2) has double bond character and is shorter than that of a homologous compound's azomethine group. The dihedral angle formed by the phthalide and phthalazine ring systems is 87.2 (3) degrees are almost perpendicular to each other. The molecules are linked in the crystal structure by weak C—H...O hydrogen bonding interactions, which create layers parallel to the ab plane. The computed hydrogen bond lengths were 2.41 and 2.54, respectively (Table1, Fig. 2). Furthermore as a non-covalent interaction, hydrogen bonding is very significant in supramolecular chemistry and physics. The application of hydrogen bonding among heterocycle compounds and solvent molecules comprising O or N donors to produce supermolecules has been proven. According to one study, the interaction of 2,6-diacetylpyridine with 1,2-phenylenediamine can lead to formation of benzimidazole group via oxidative dehydrogenation. In anhydrous absolute ethanol, a benzimidazole derivative was also obtained from the reaction of 5-bromo-2-hydroxybenzaldehyde and 1,2-phenylenediamine. In this study, we used 2-carboxybenzaldehyde and hydrazinehydrate as reagents to produce a new product 2,2'-(azinodimethylidene)bis-benzoic Acid for complex formation with different metals, however various dissimilar metals surprisingly generated a new heterocyclic compound 2-(1,3-dihydro-1-oxoisobenzofuran-3-yl)phthalazin-1(2H)-one at various time intervals, as a result of this effort. The compound was established as a result of this. Which is essential for the detection of 2-Nitrophenol and Picric acid selectively.

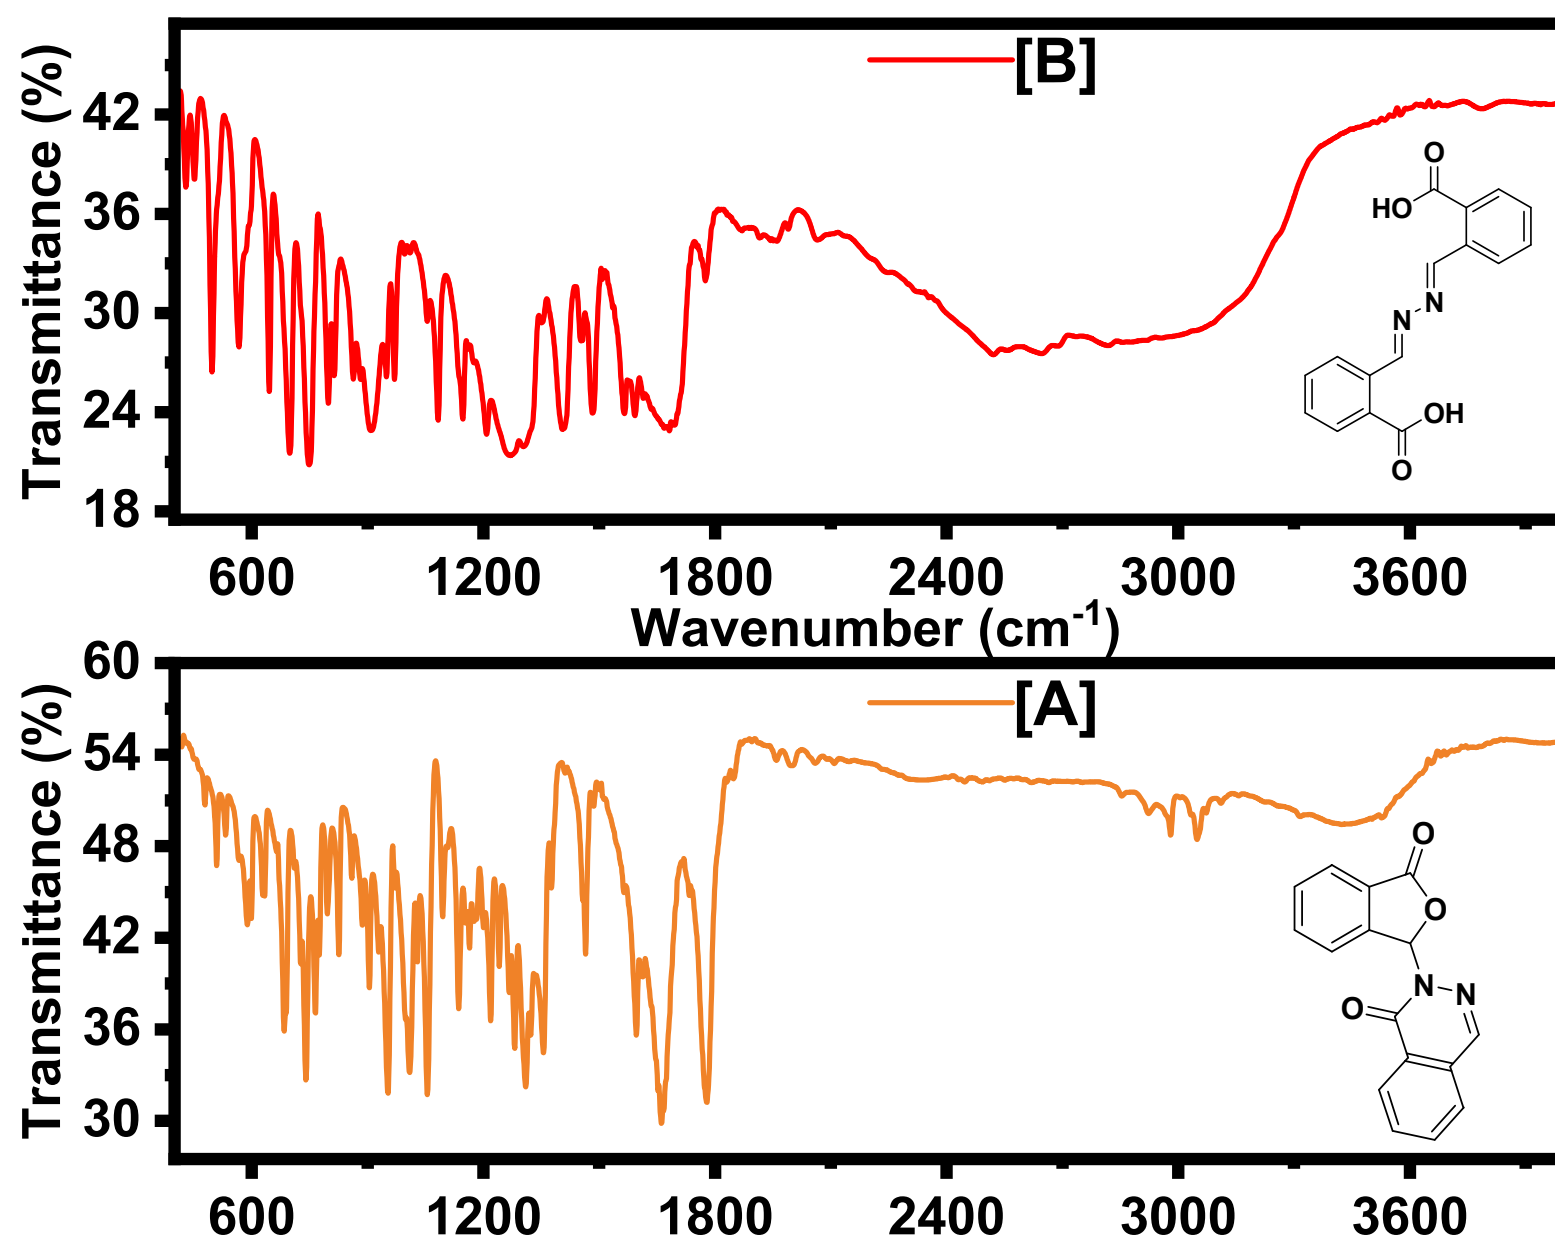

Fig. S1 FTIR Spectra of (B) ADMBA and (A) 1

## Supplementary Materials

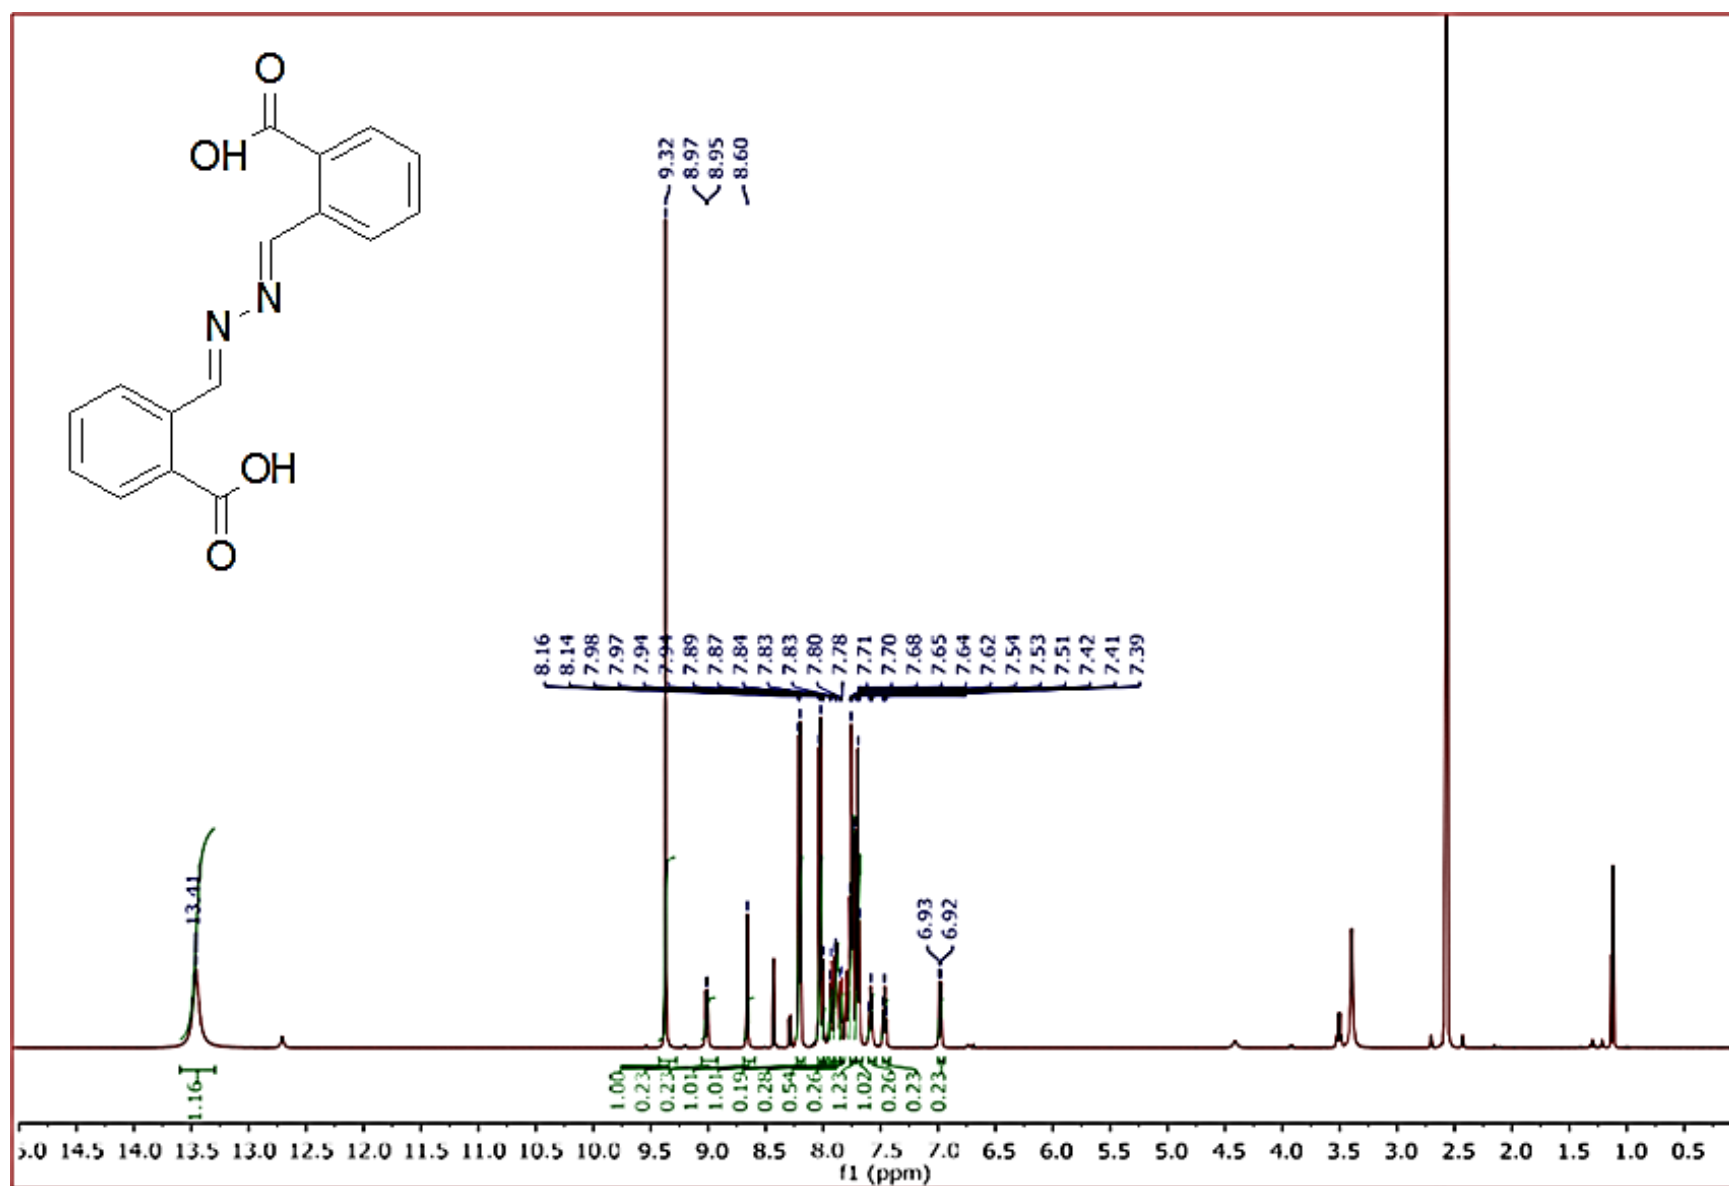

Fig. S2 <sup>1</sup>H NMR Spectra of ADMBA

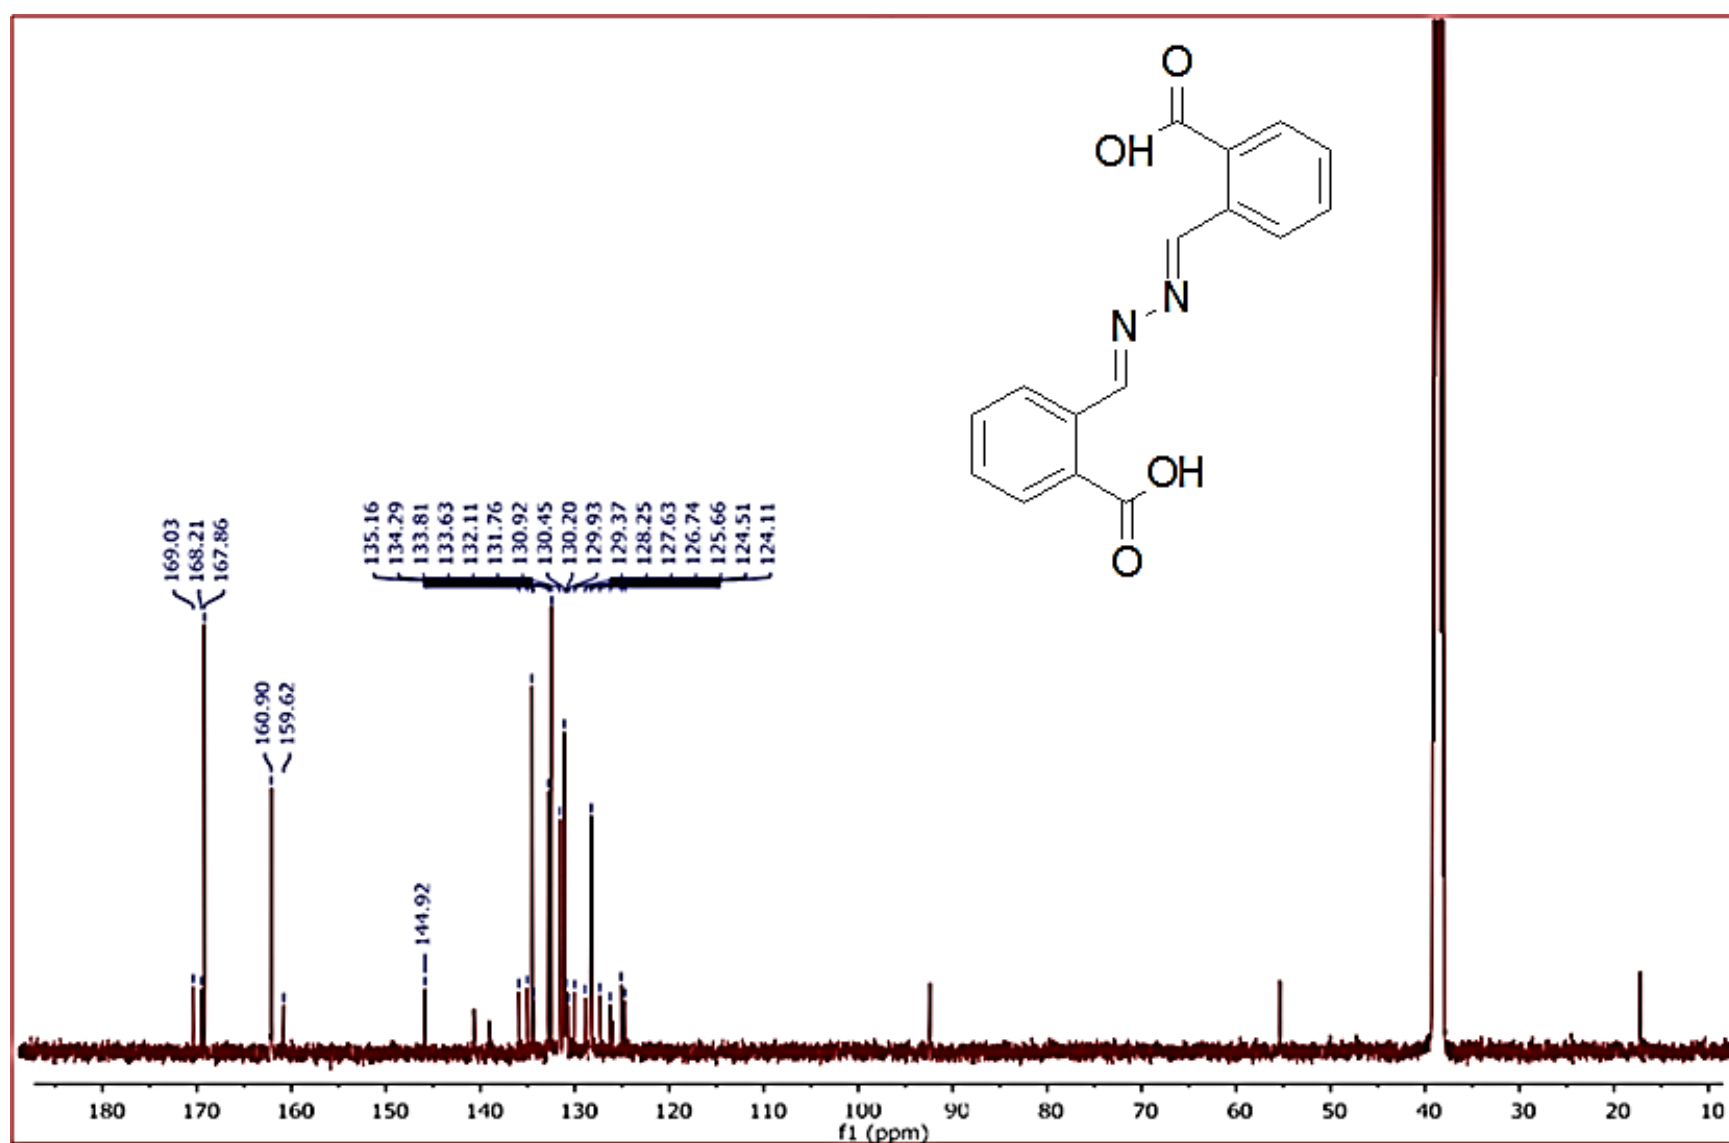

Fig. S3 <sup>13</sup>C NMR Spectra of ADMBA

## Supplementary Materials

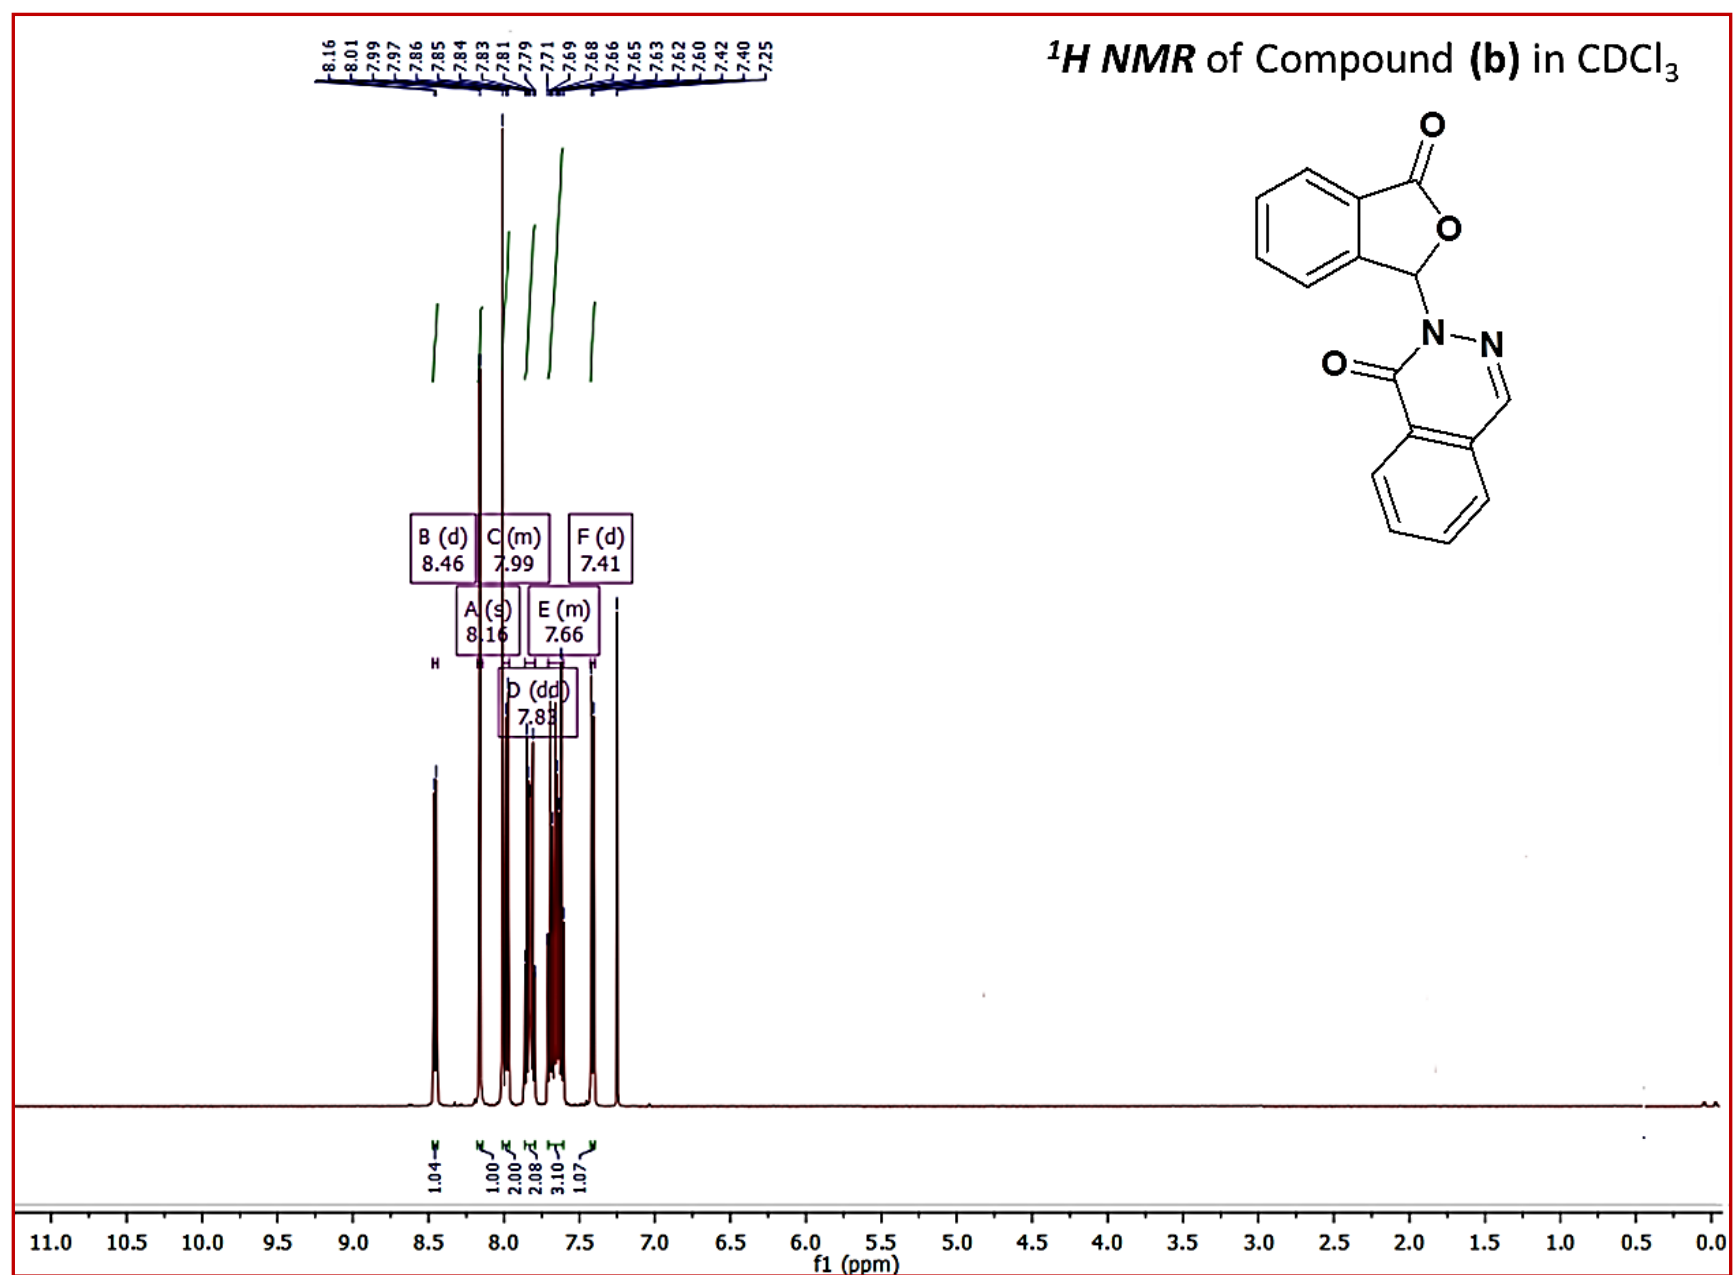

Fig. S4  $^1\text{H}$  NMR Spectra of 1

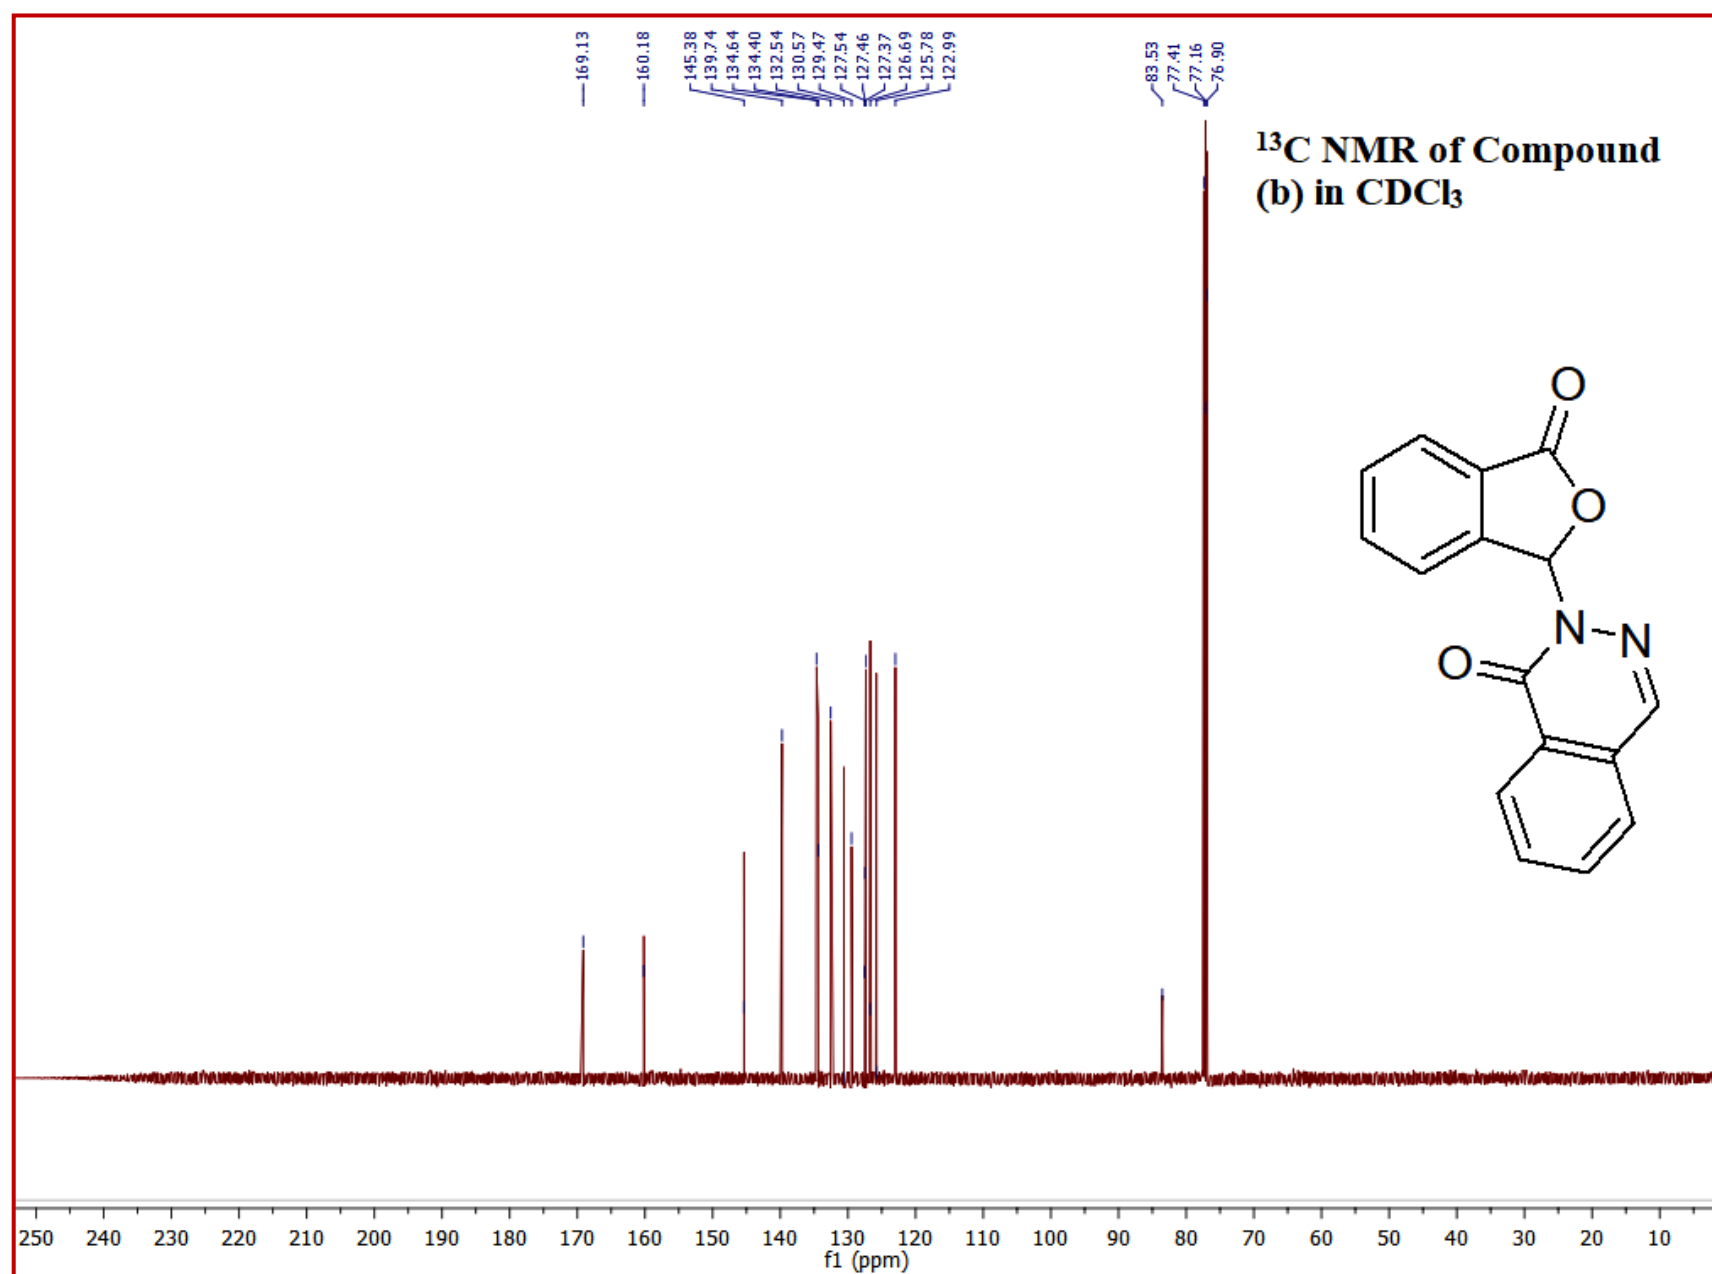

Fig. S5  $^{13}\text{C}$  NMR Spectra of 1



## Supplementary Materials

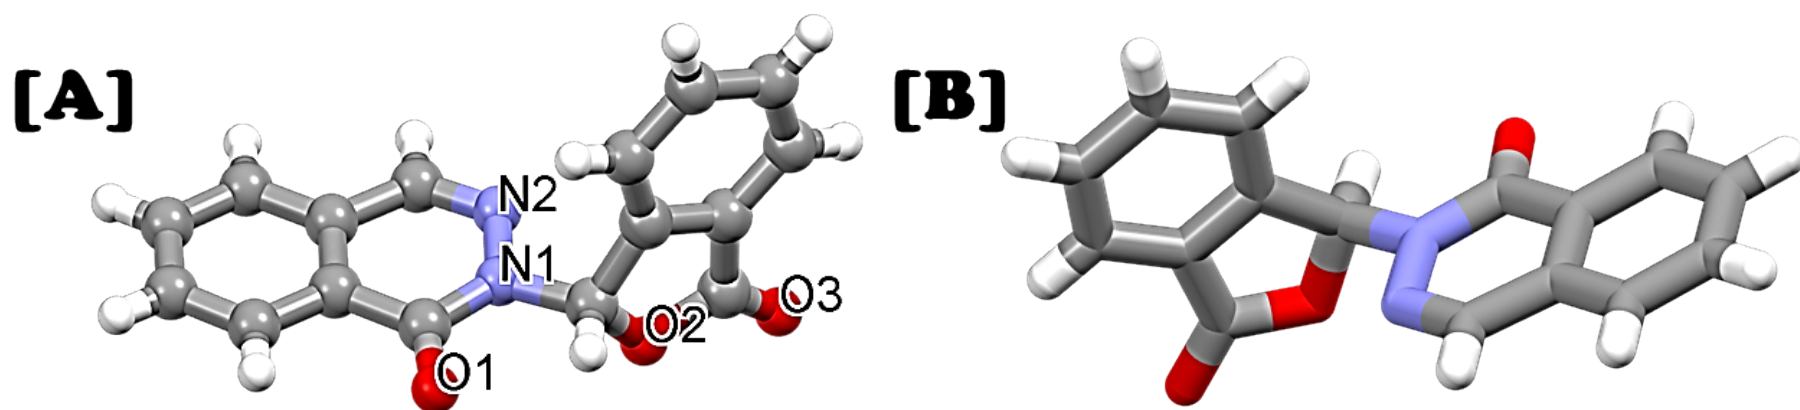

Fig. S6. Asymmetric unit of **1**

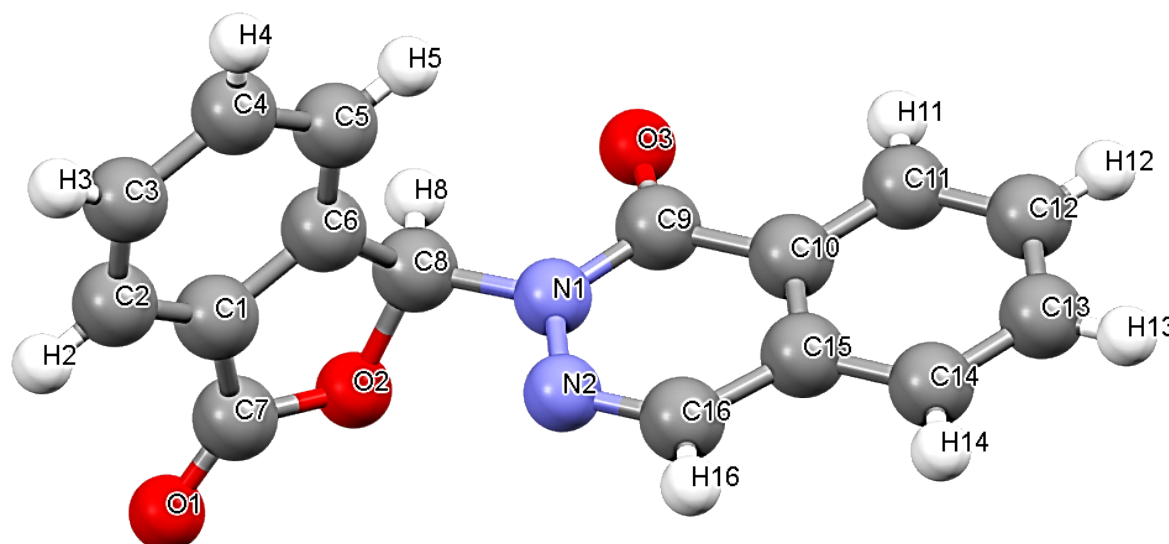

Fig. S7 The molecular structure exhibiting the atom-numbering scheme.

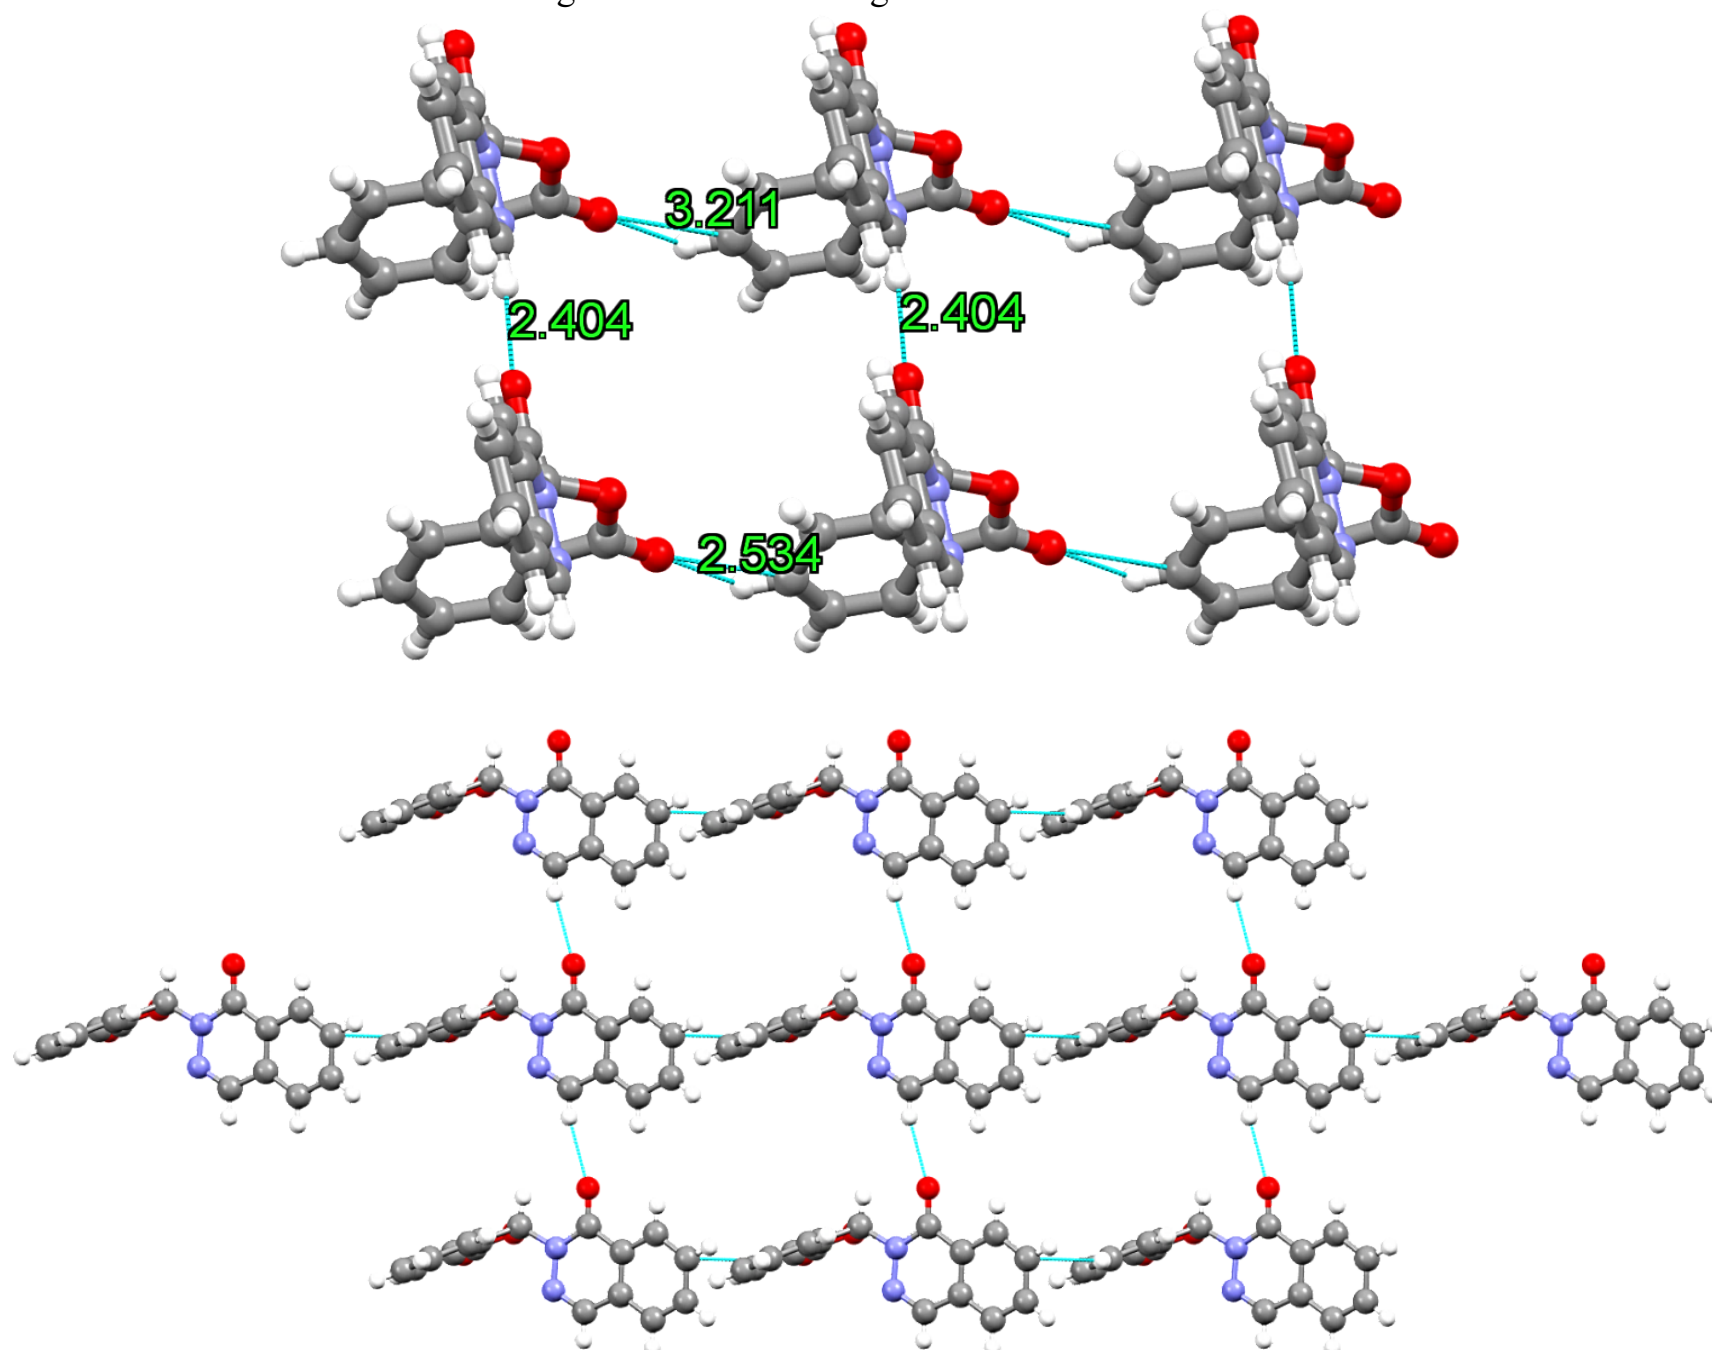

Fig. S8 Supramolecular network view of the title structure. Intermolecular hydrogen bonds are shown as green dotted dashed lines.

## Supplementary Materials

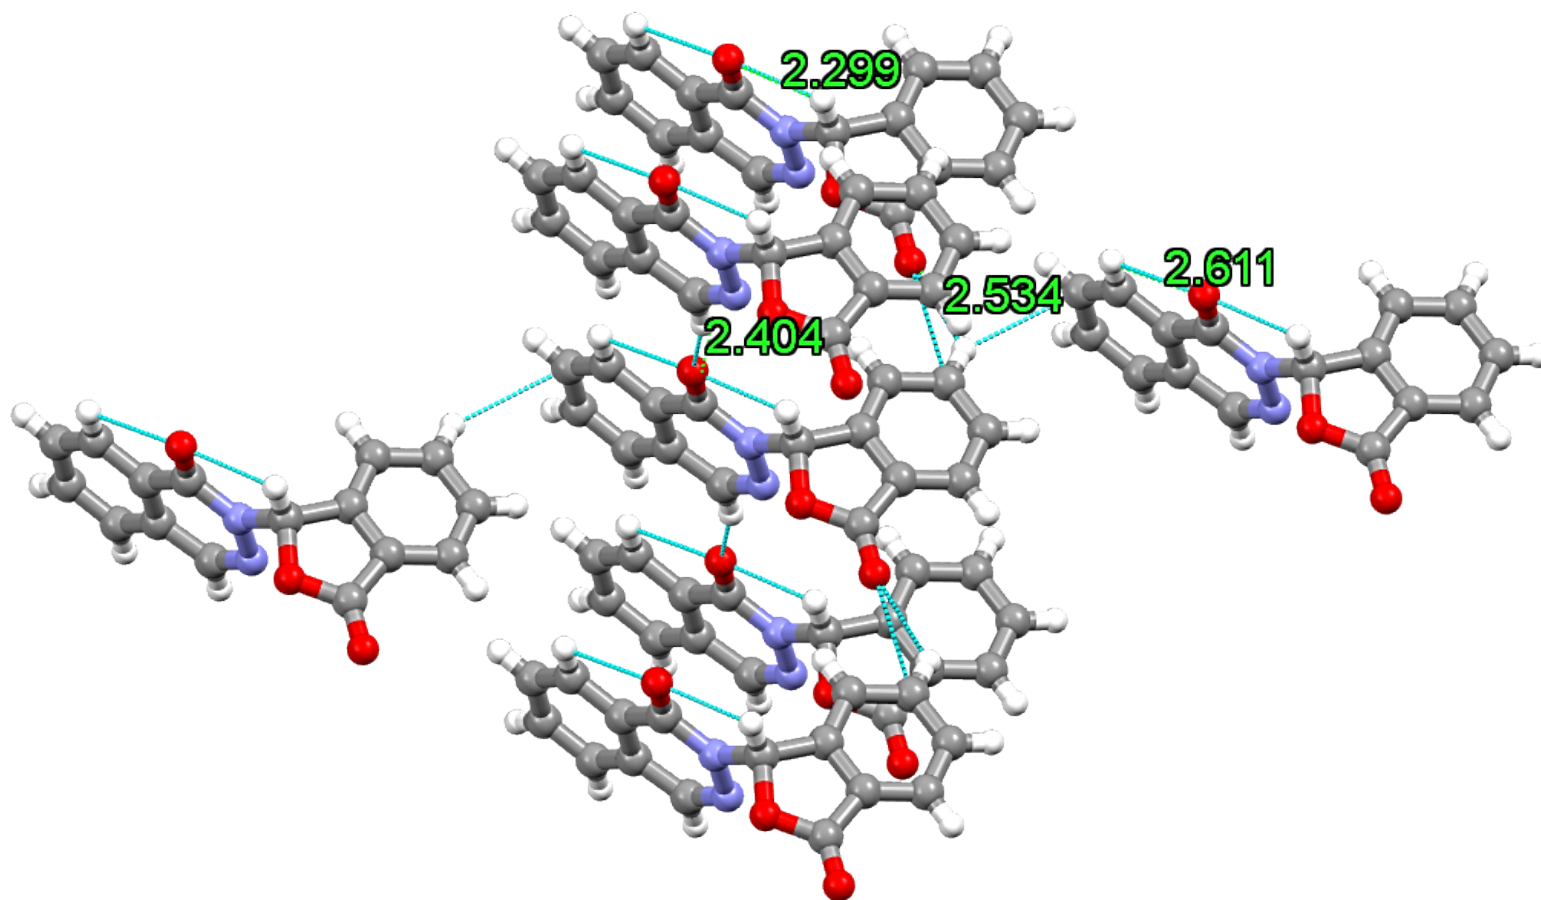

Fig. S9 H—O—H hydrogen bonding interactions of the title structure. Intramolecular and intermolecular hydrogen bonds are shown as green dotted dashed lines.

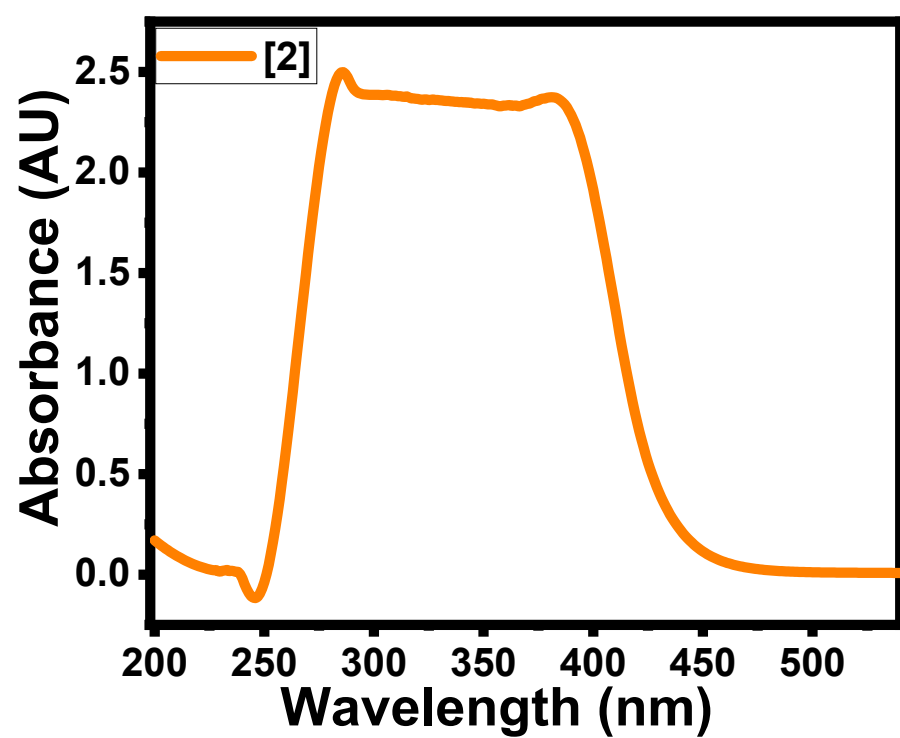

Fig. S10: UV/vis Spectra of the 2

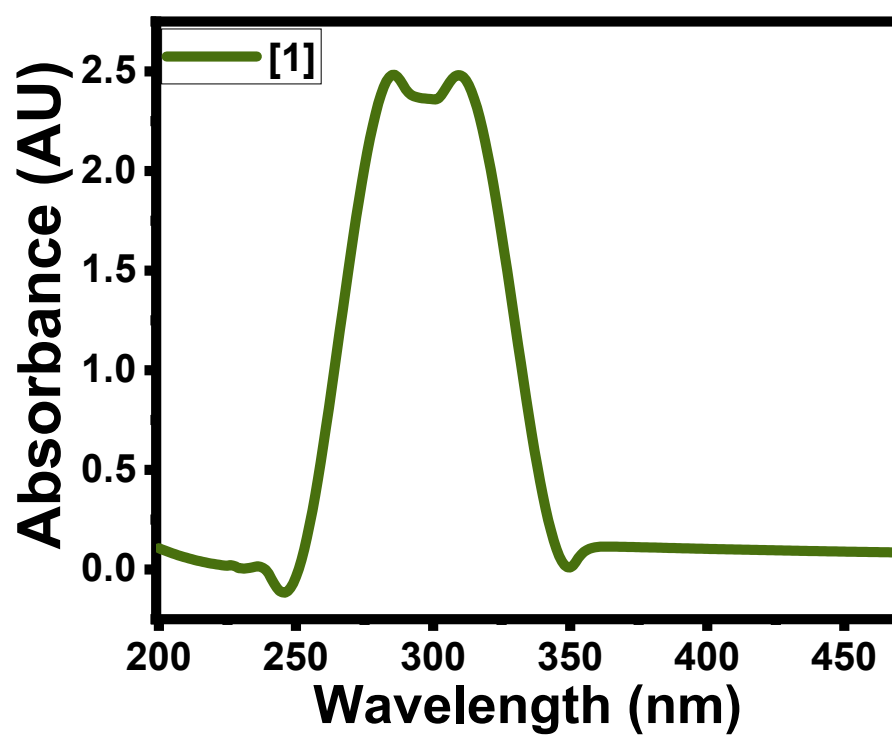

Fig. S11: UV/vis Spectra of the 1

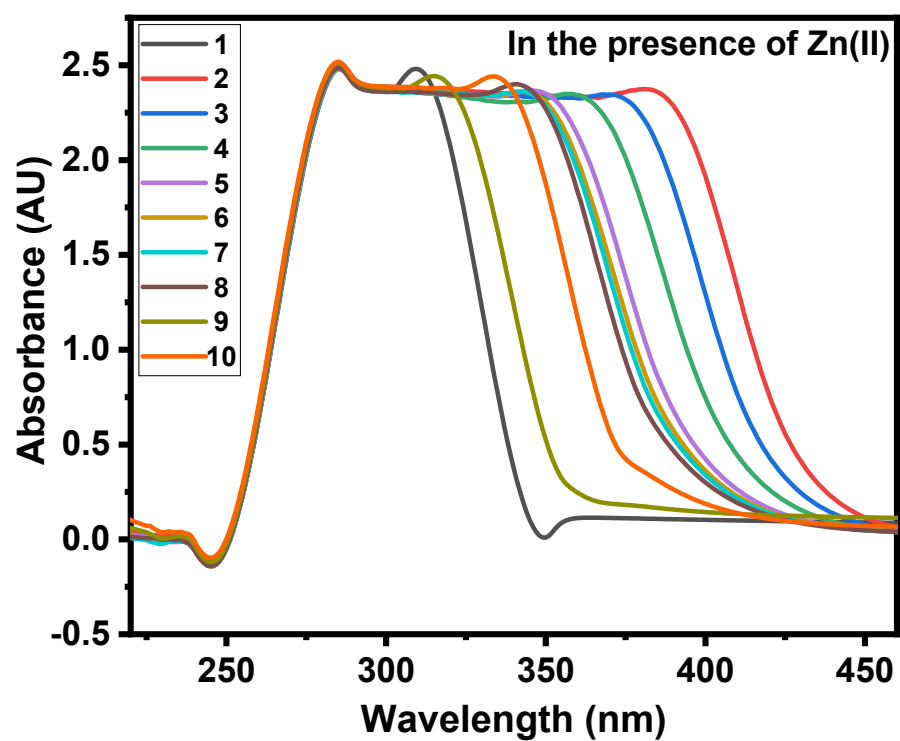

Fig. S12: Reaction Kinetics in the presence of Zn(II) ions in time interval ~ 13 min conversion time required is 1.5 h.

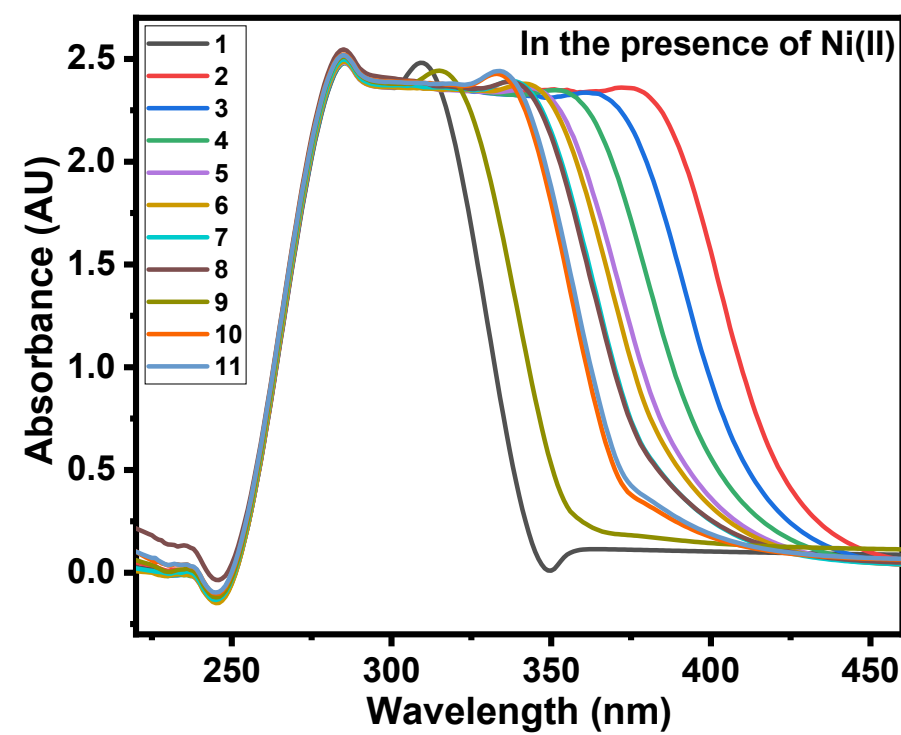

Fig. S13: Reaction Kinetics in the presence of Ni(II) ions in time interval ~ 21 min conversion time required is 2.5 h.

## Supplementary Materials

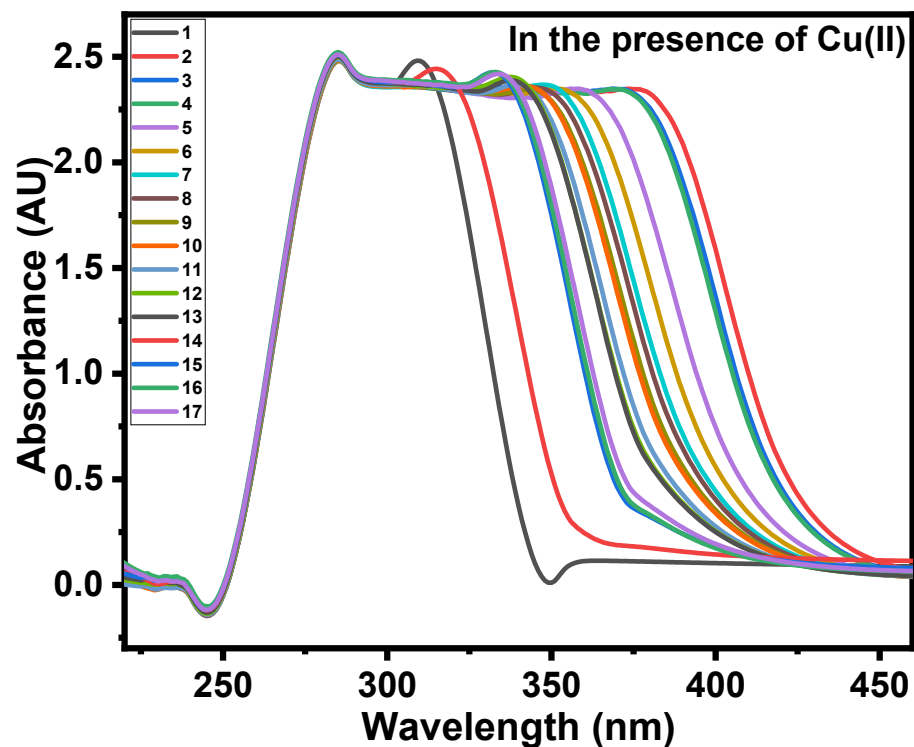

Fig. S14: Reaction Kinetics in the presence of Cu(II) ions in time interval ~ 34 min conversion time required is 4.0 h.

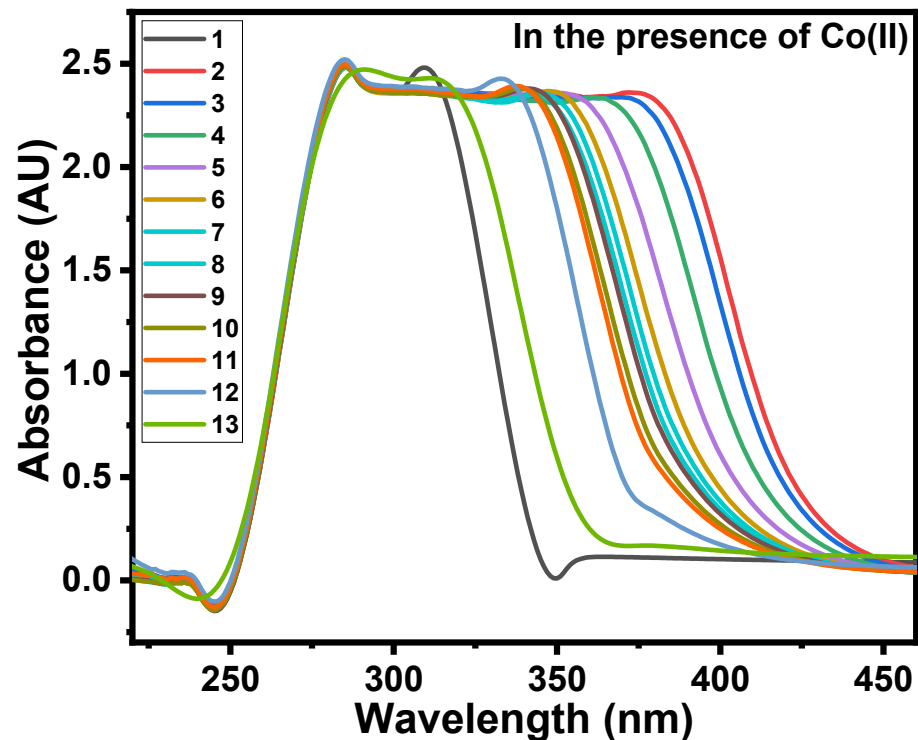

Fig. S15: Reaction Kinetics in the presence of Co(II) ions in time interval ~ 26 min conversion time required is 3.0 h.

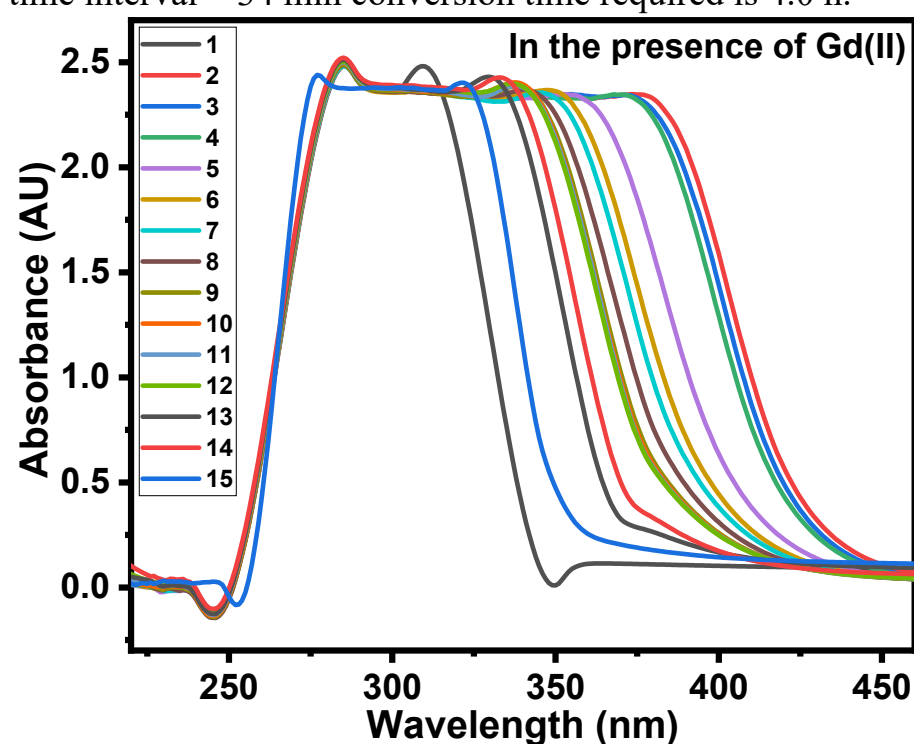

Fig. S16: Reaction Kinetics in the presence of Gd(II) ions in time interval ~ 39 min conversion time required is 4.5 h.

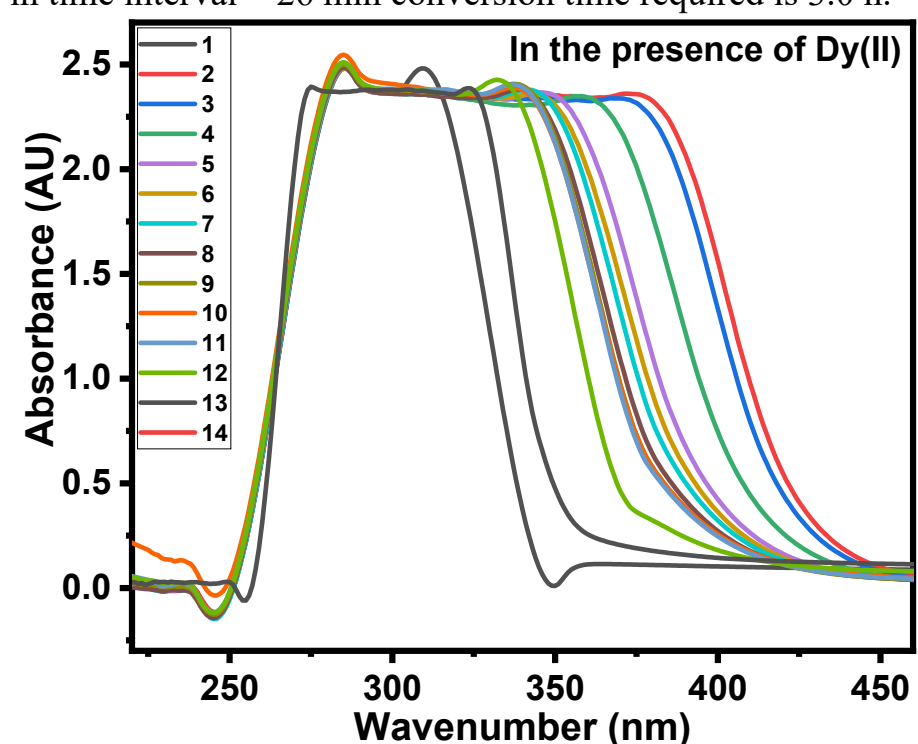

Fig. S17: Reaction Kinetics in the presence of Dy(II) ions in time interval ~ 34 min conversion time required is 4.0 h.

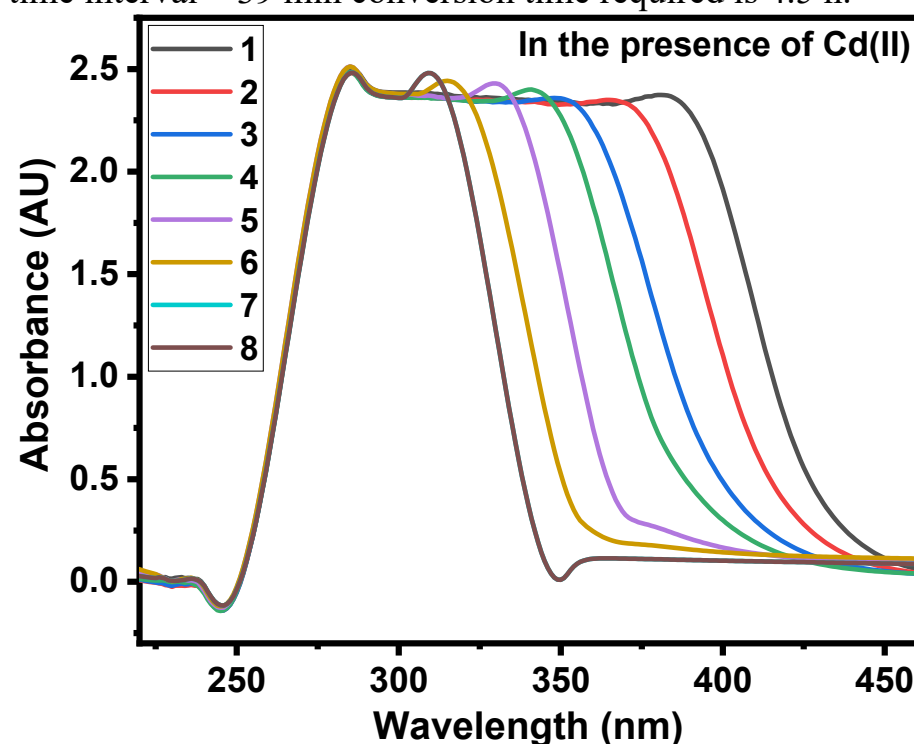

Fig. S18: Reaction Kinetics in the presence of Cd(II) ions in time interval ~ 4 min conversion time required is 0.5 h.

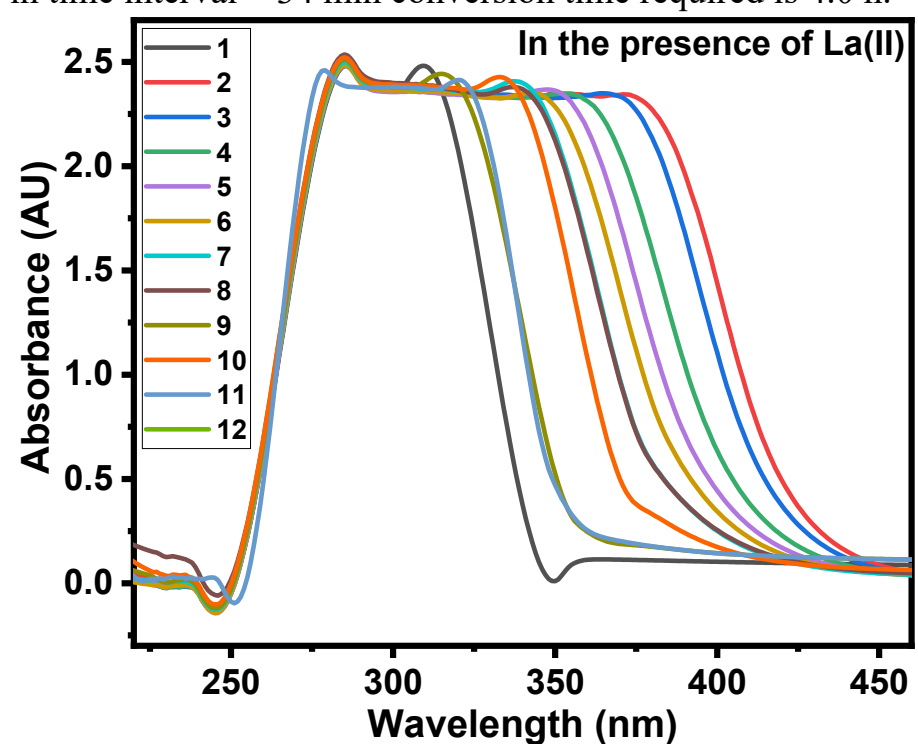

Fig. S19: Reaction Kinetics in the presence of La(II) ions in time interval ~ 34 min conversion time required is 4.0 h.

## Supplementary Materials

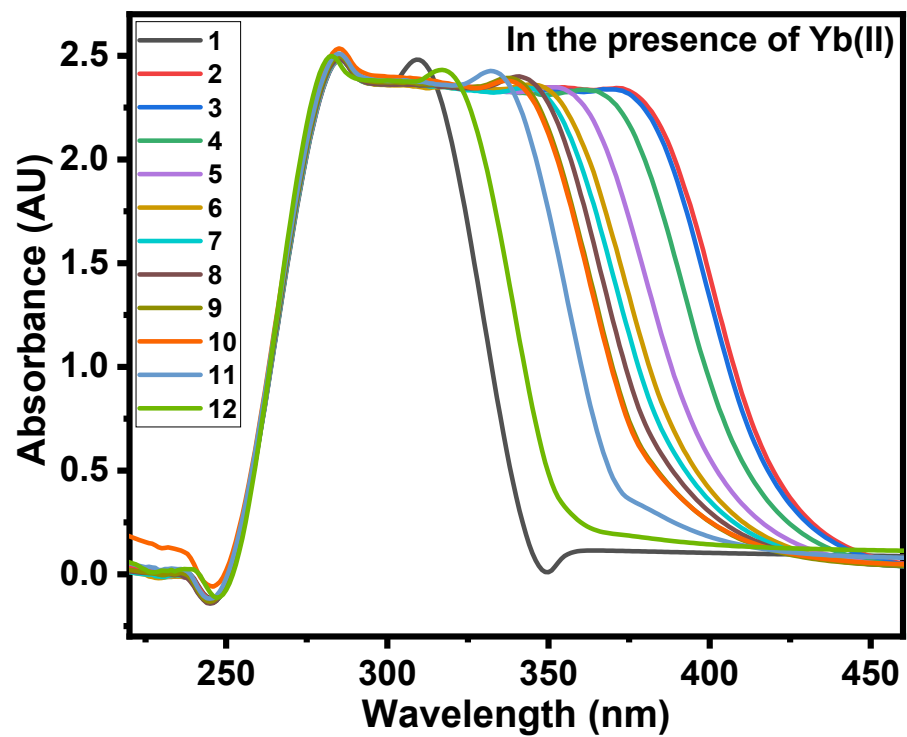

Fig. S20: Reaction Kinetics in the presence of Yb(II) ions in time interval ~ 43 min conversion time required is 5.0 h.

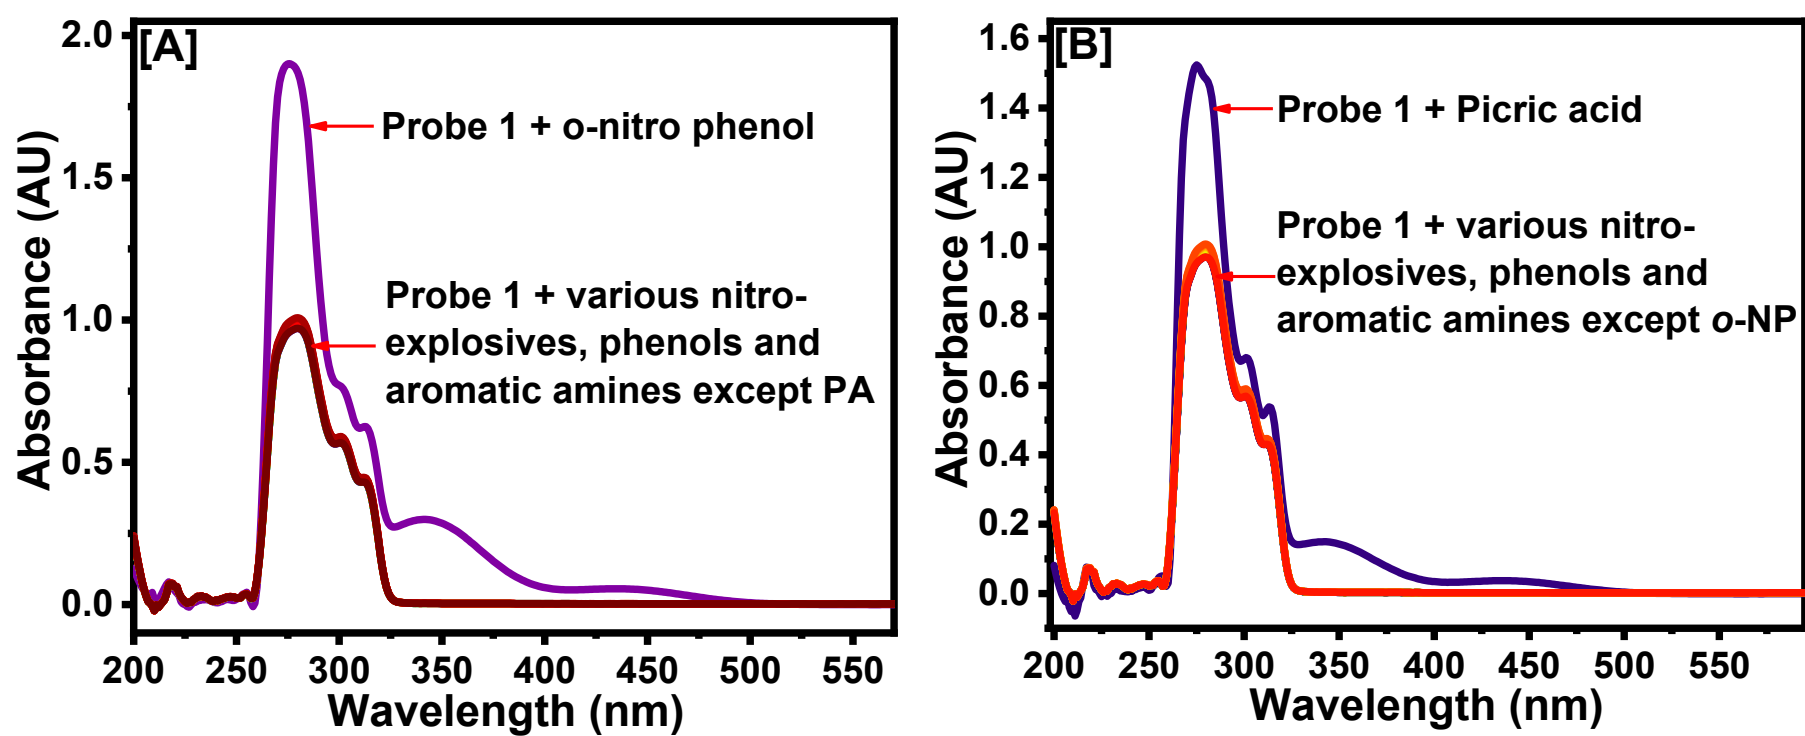

Fig. S21 (A) and (B) UV/vis spectra of 1 in presence of nitroaromatics, phenols and aromatic amines in solvent containing molar ratio (DMF: H<sub>2</sub>O; 6:4).

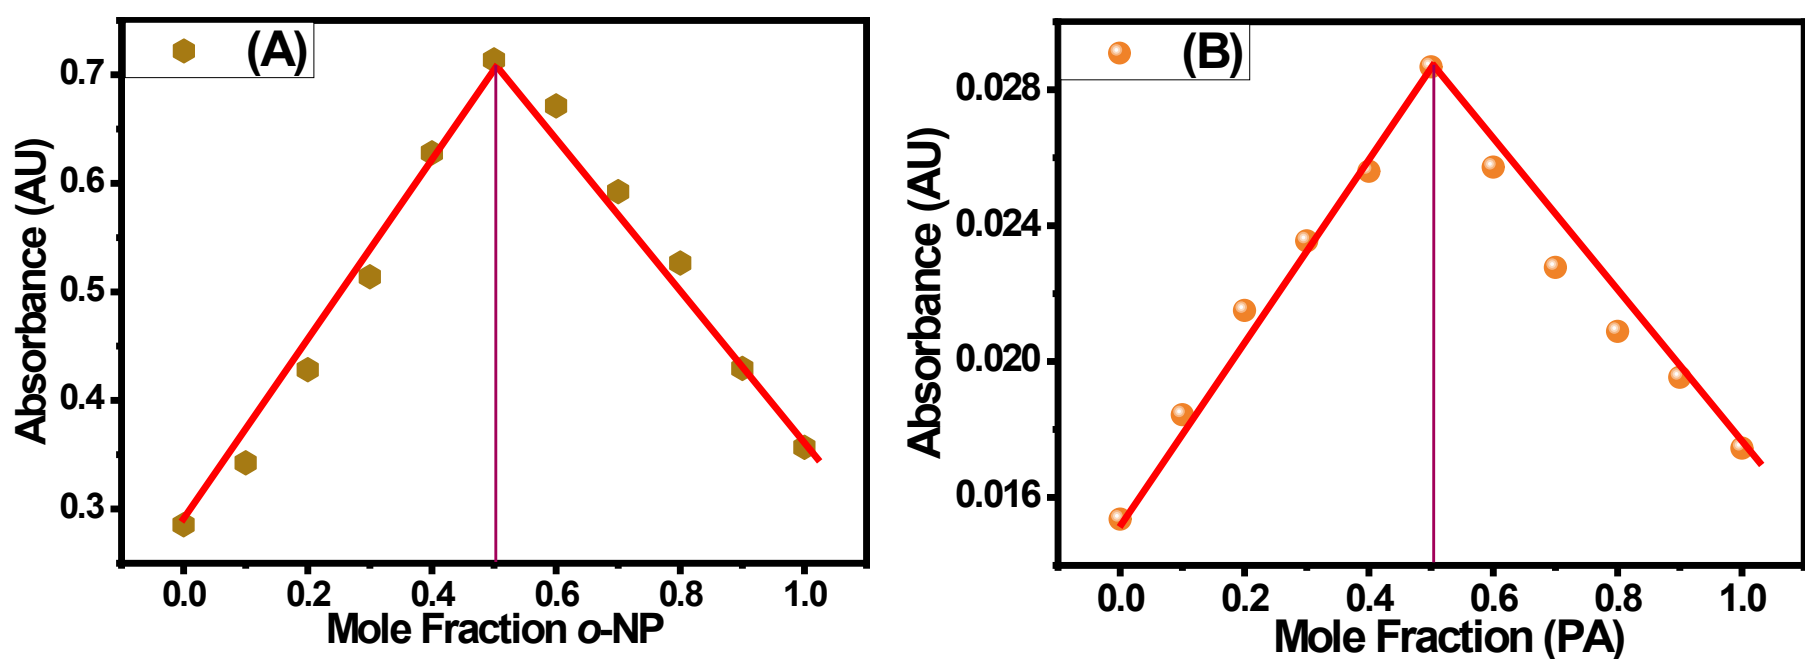

Fig. S22 Job's plot for the binding of 1 with (A) o-NP, and (B) with PA at  $\lambda_{(ab)}$  278 nm.

## Supplementary Materials

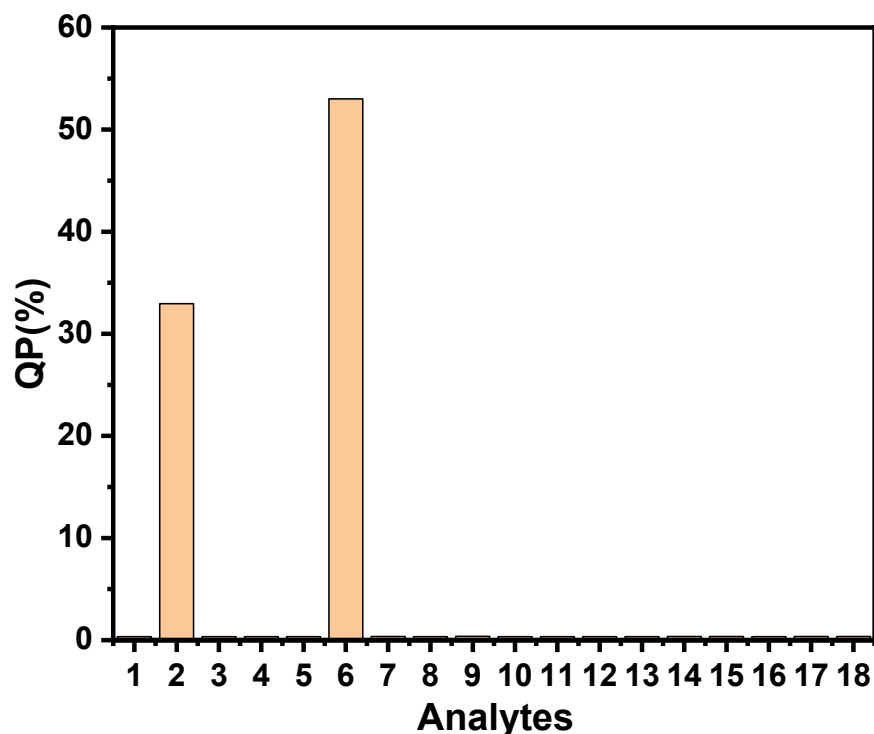

**Fig. S23** Fluorescence response of **1** (10 μM) toward various NACs, phenols and aniline derivatives (i.e. p-nitrophenol (1) o-nitrophenol (2), m-nitrophenol (3), 3-Methoxyphenol (4), 2-Isopropylphenol (5), 2,4,6-Trinitrophenol (6), 2,4-Dibromophenol (7), 3-Chlorophenol (8), 2,4,6-Trichlorophenol (9), 2,4-Dichlorophenol (10), Quinol (11), Phenol (12), Resorcinol (13), 4-Chloroaniline (14), Tertbutylaniline (15), 2-Chloroaniline (16), 2,4-Difluoroaniline (17) and aniline (18) ( $\lambda_{ex} = 300$  nm).

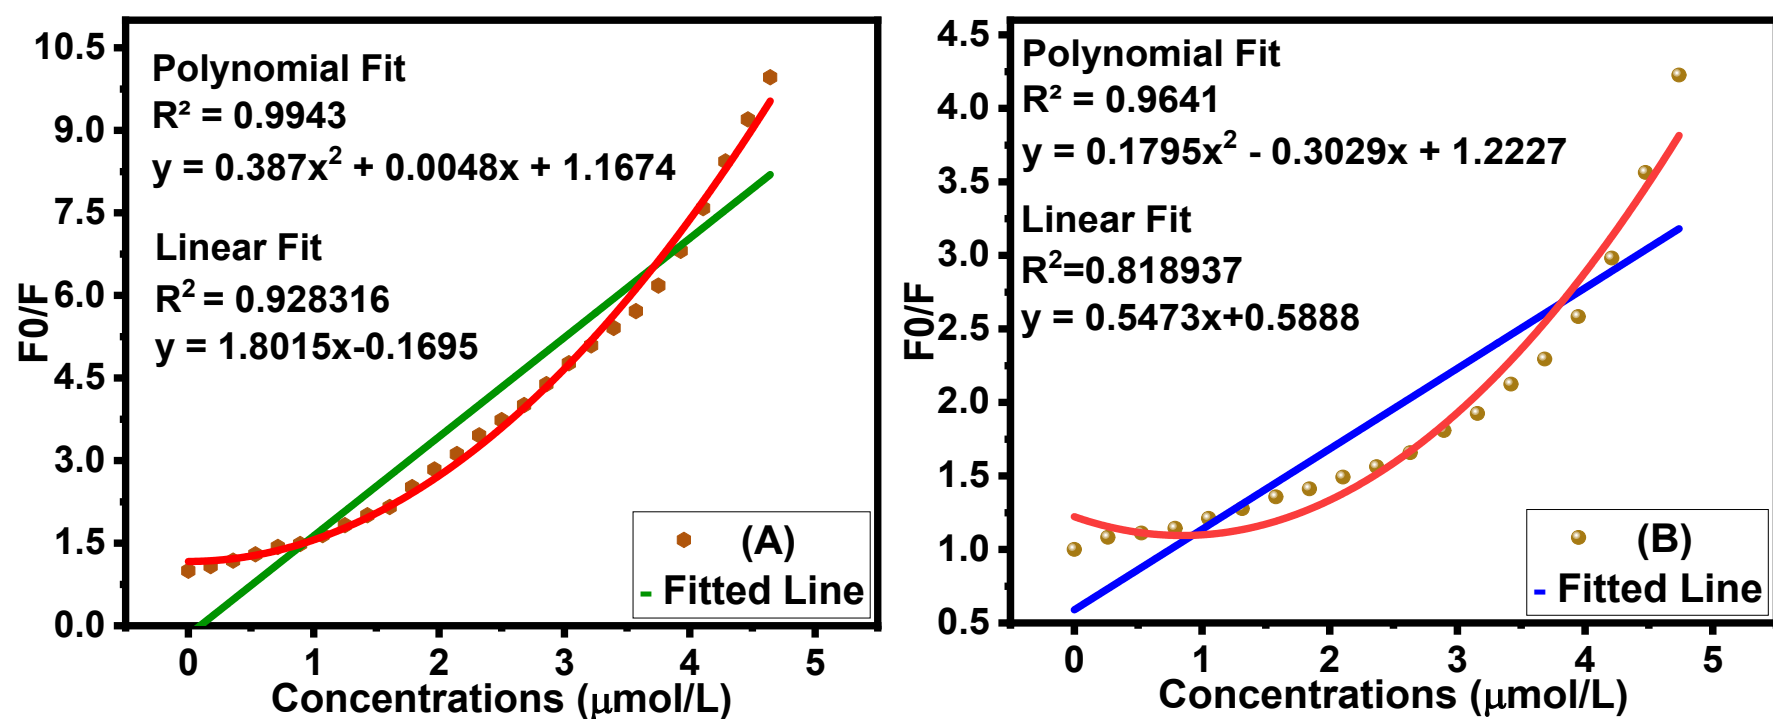

**Fig.: S24** Polynomial and Linear Fitted curve of **1** ( $F_0/F$ ) Vs Concentration (A) by adding successive concentrations of o-NP and **1** (B) by adding successive concentrations of PA.

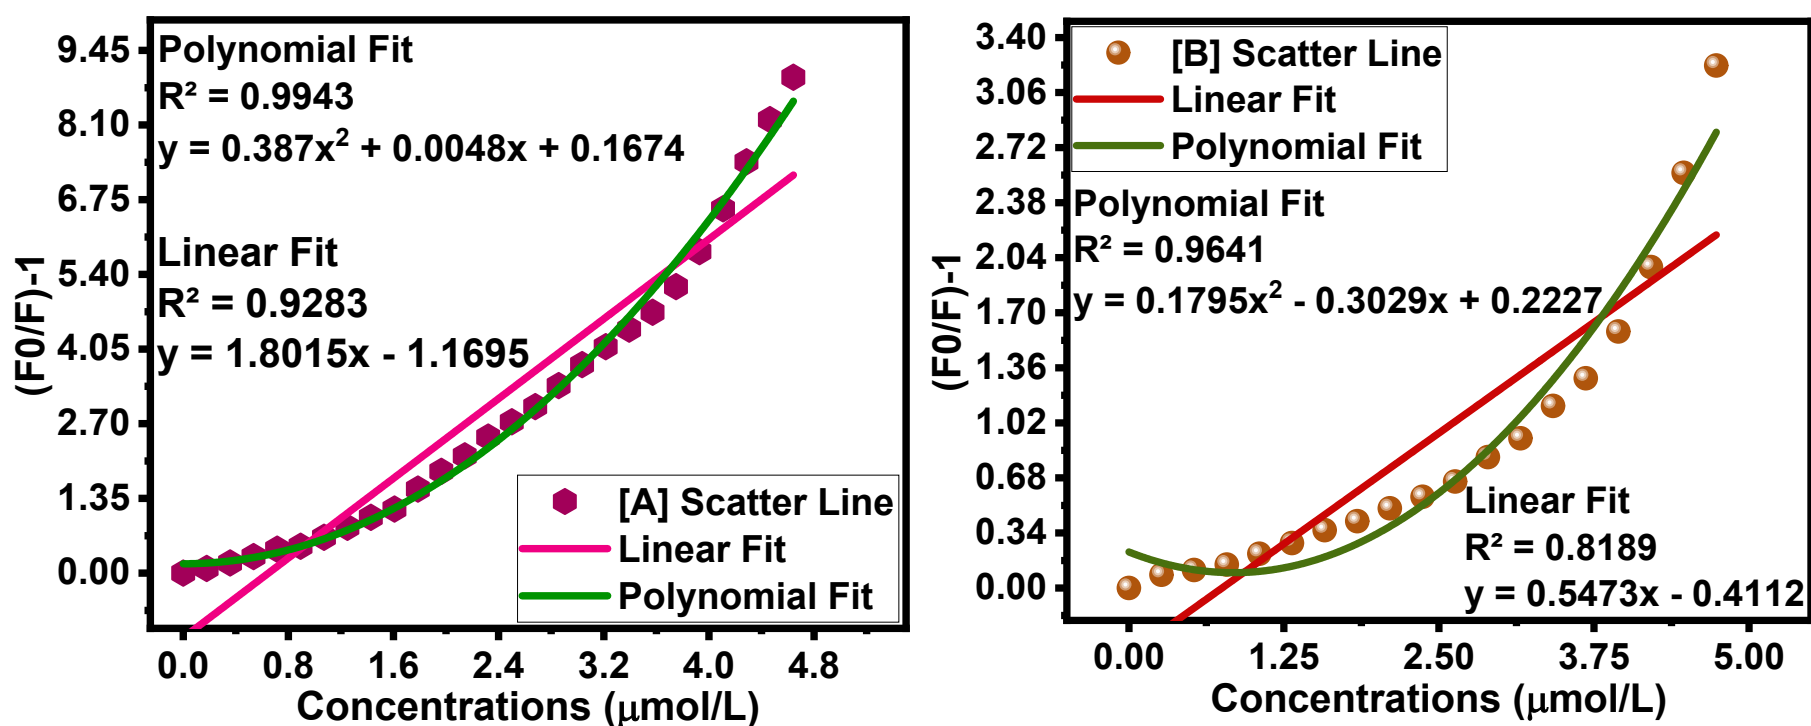

**Fig.: S25** Polynomial and Linear Fitted Stern-Volmer curve ( $F_0/F$ )-1 Vs Concentration of **1** (A) by adding successive concentrations of o-NP and probe-2 (B) by adding successive concentrations of PA.

## Supplementary Materials

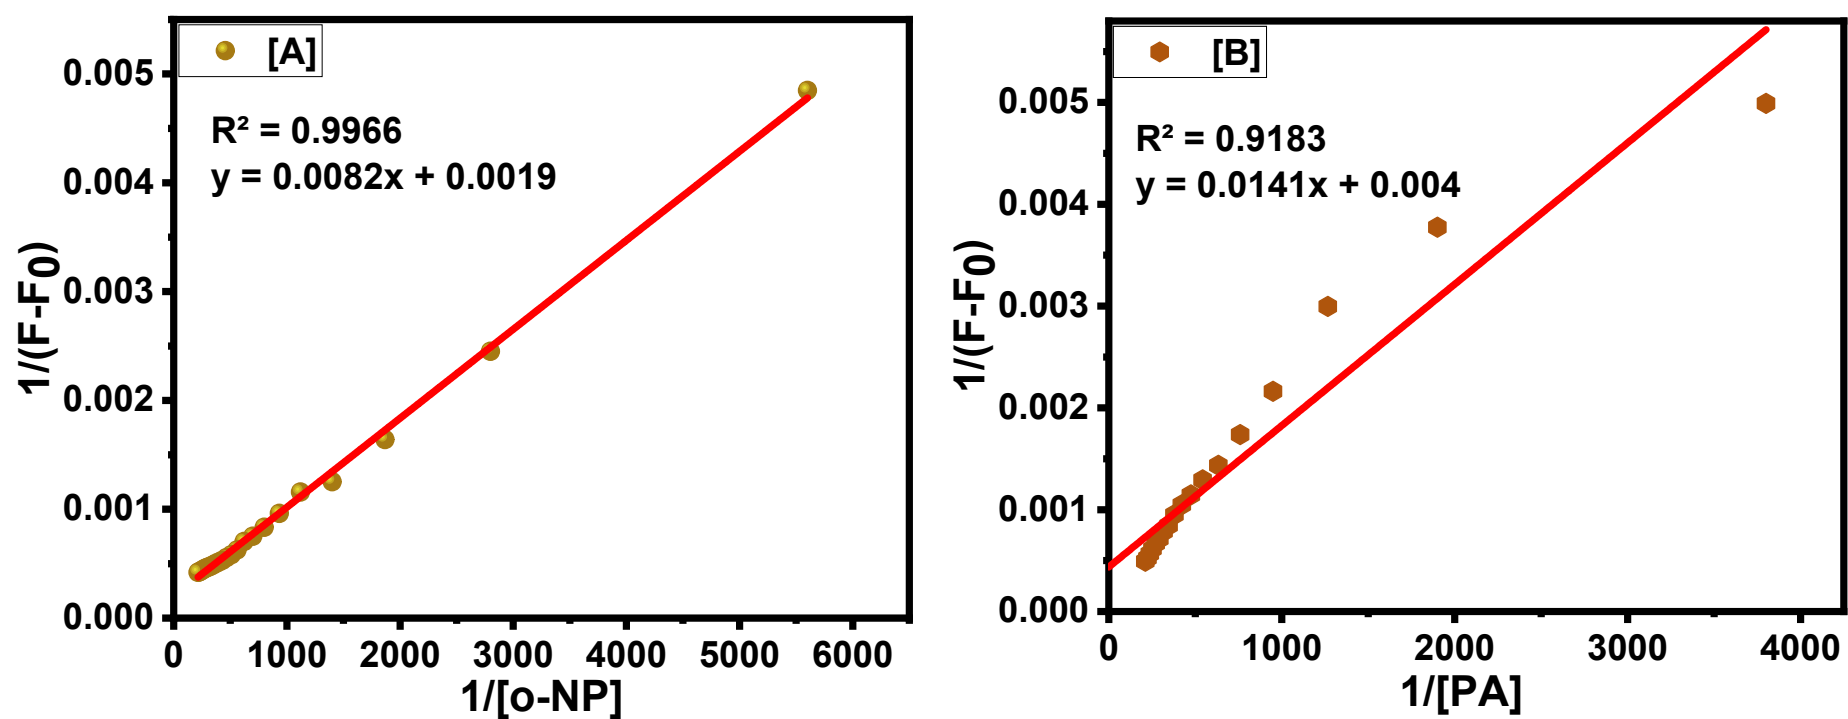

Fig. S26 13 Benesi-Hildebrand plot for binding of 1 with (A) o-NP and (B) PA.

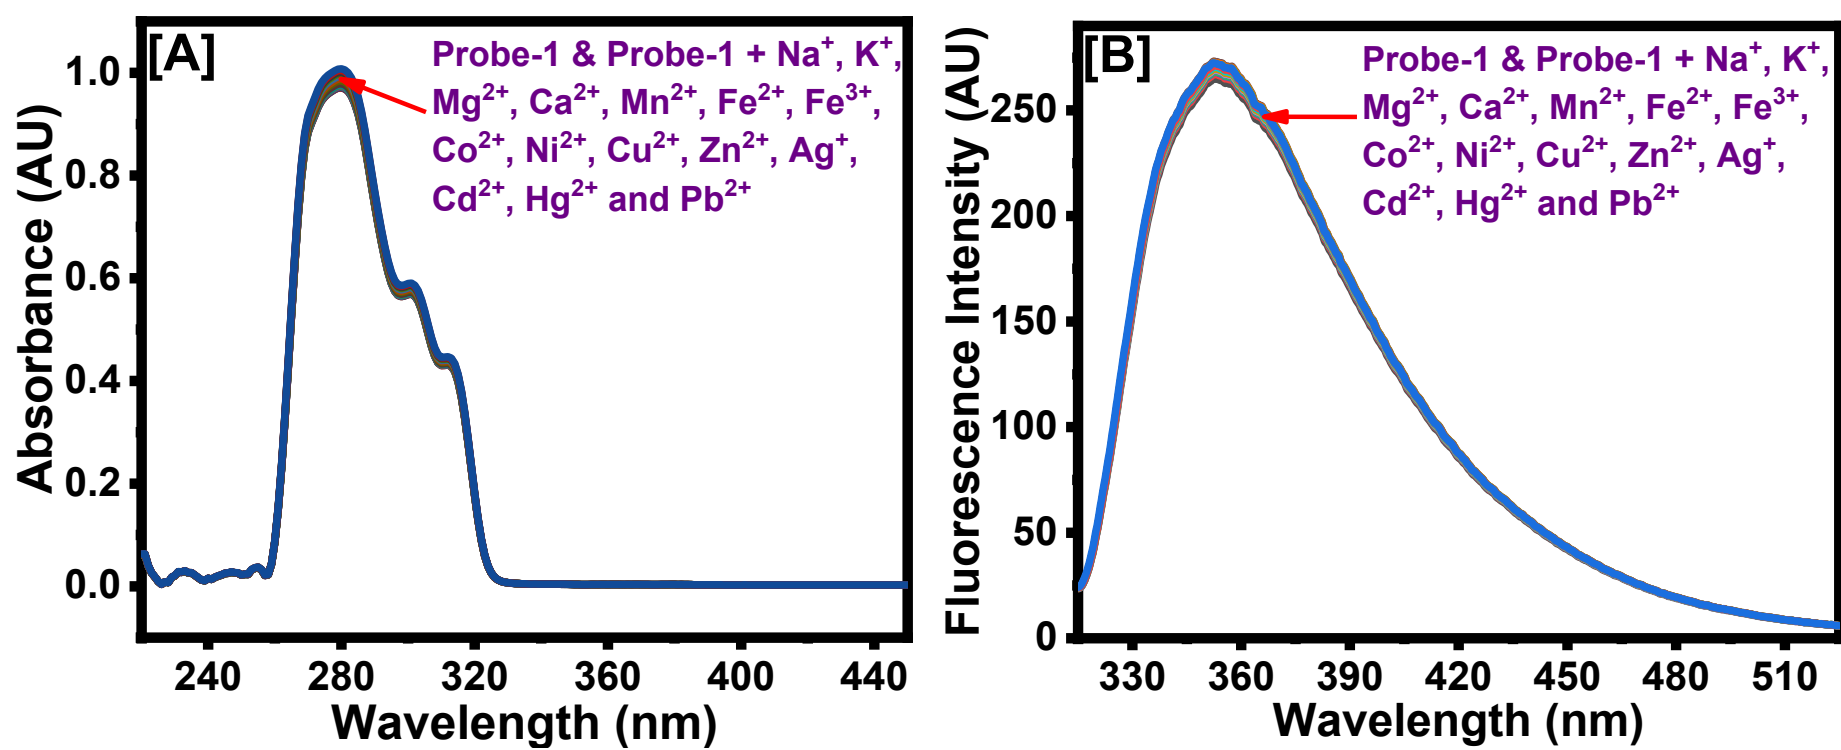

Fig. S27 UV/vis spectra (A) and Fluorescence spectra (B) of Probe 1 in presence of various metal ions in the solvent containing molar ratio (DMF/ H<sub>2</sub>O; 6:4 v/v).

## Supplementary Materials

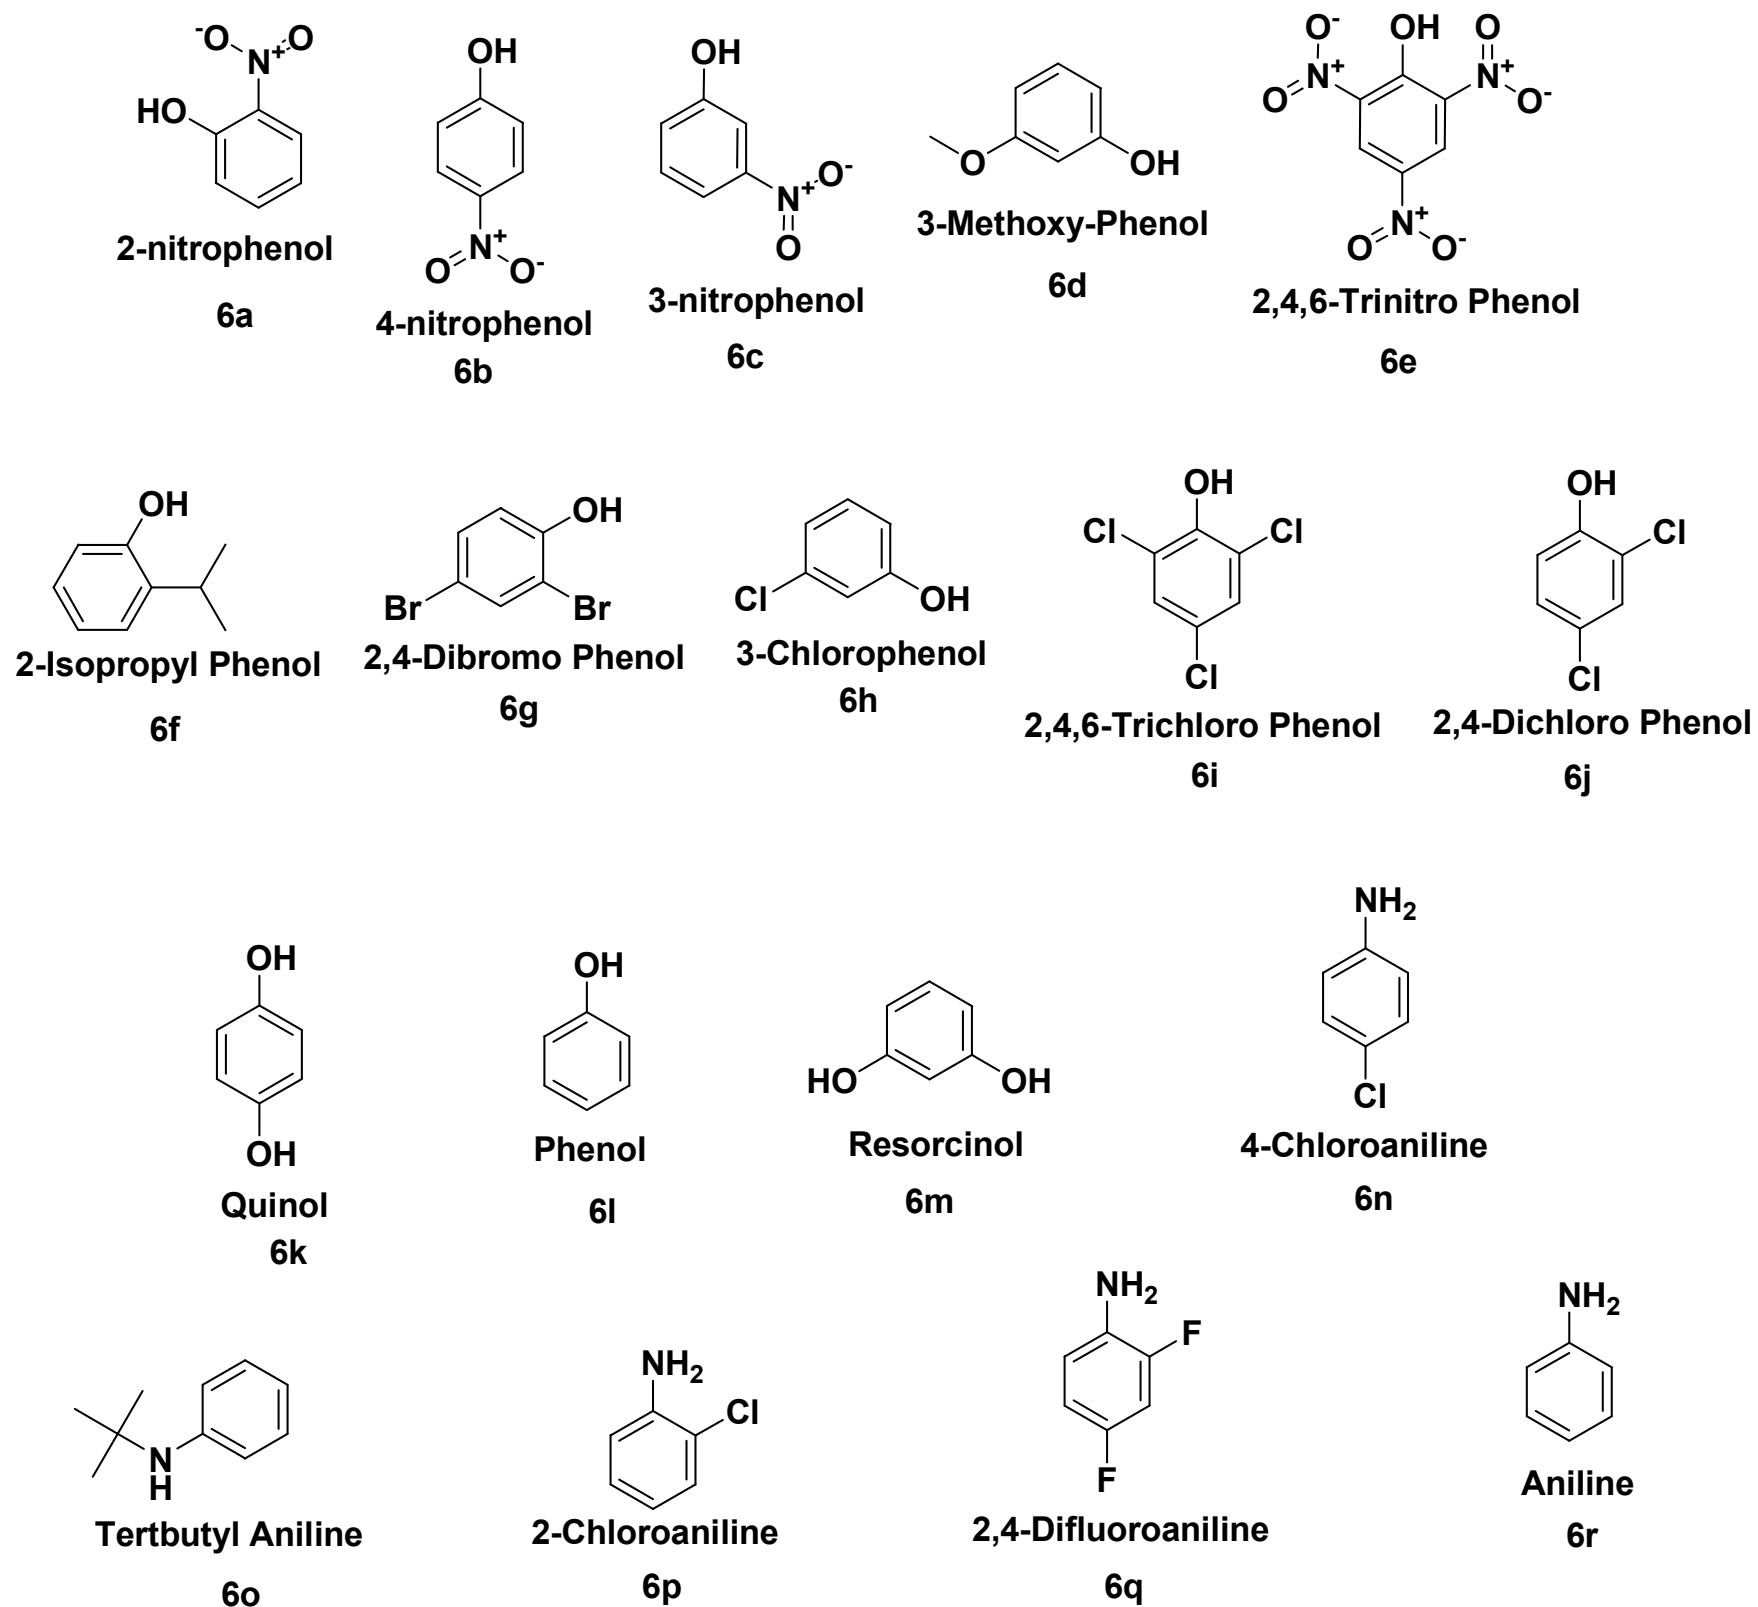

Scheme S1. Guests 6 used in this study

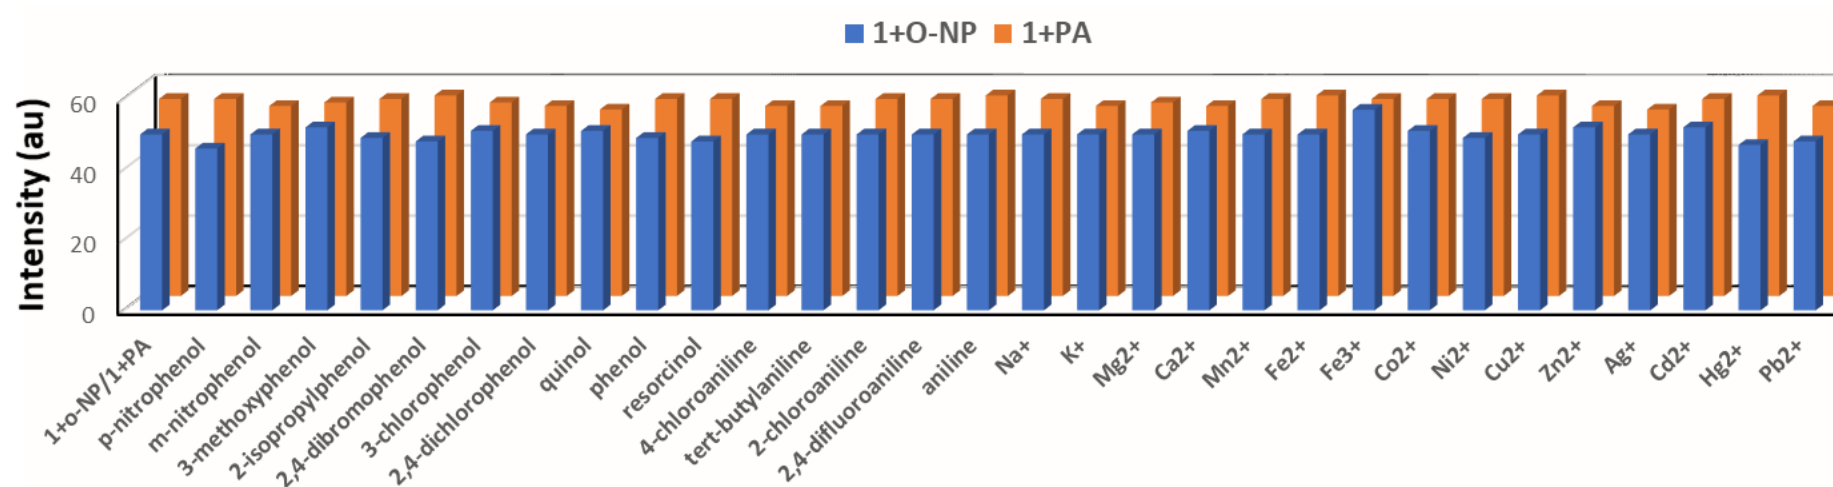

Fig. S28 Bar diagram showing interference of various cations, phenols and amines in binding of 1 with *o*-NP/PA in way (addition of analytes to the solution of 1+*o*-NP+analytes/1+PA+analytes).

## Supplementary Materials

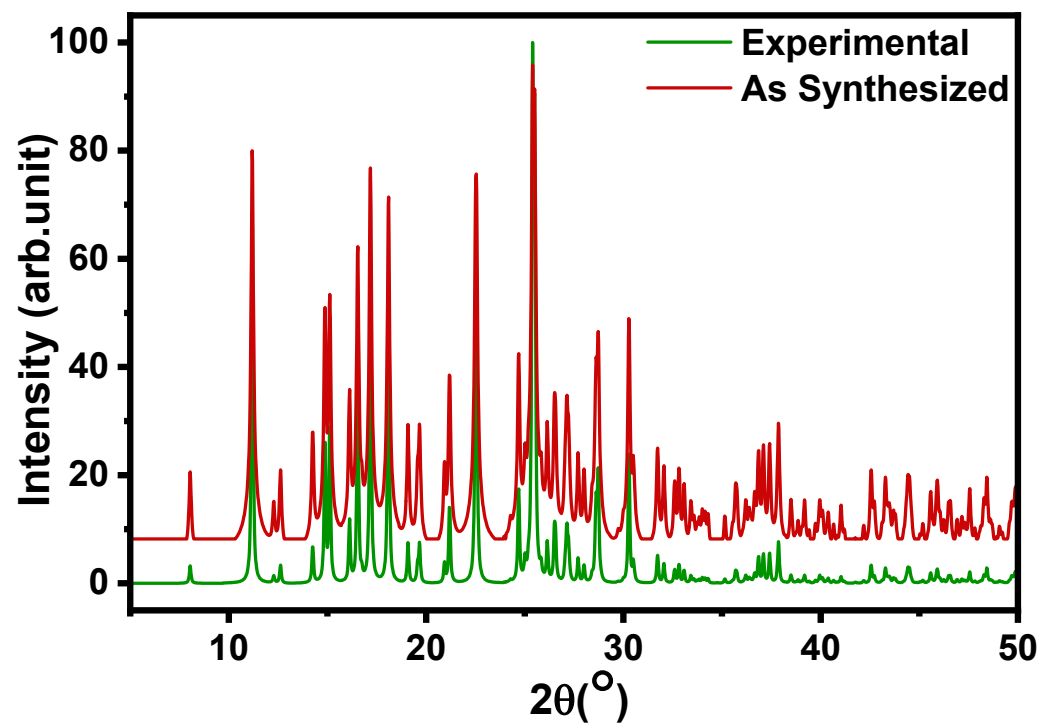

Fig. S29 Experimental PXRD pattern of 1 matching with its simulated PXRD patterns obtained from single crystal-XRD data.

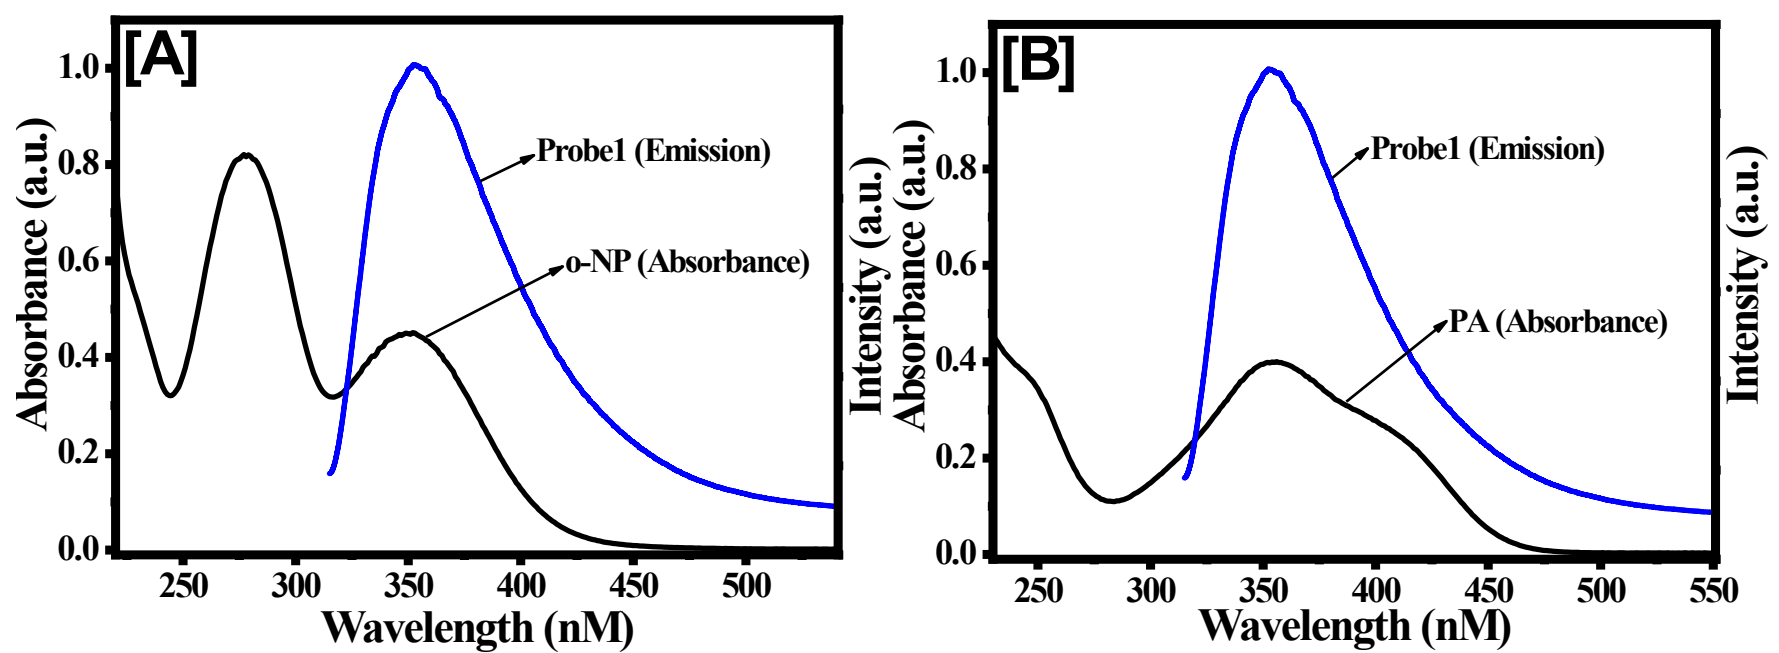

Fig. S30 Absorption spectra of electron deficient nitro-explosives (A) o-NP ; (B) PA and emission spectra of Probe 1

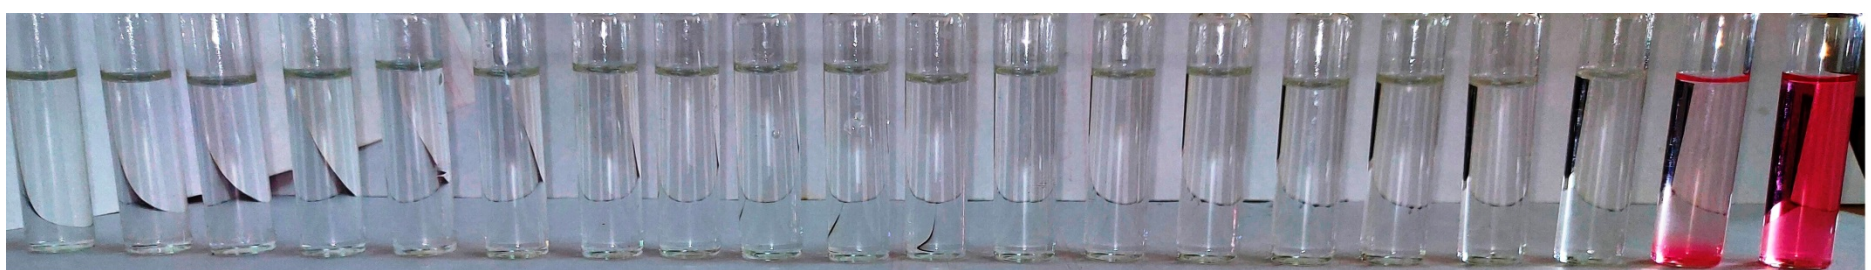

DMF+H<sub>2</sub>O 1 1+4-CIA 1+TBA 1+2-CIA 1+2,4-DBA 1+ANI 1+3-MP 1+2-IPP 1+2,4-DBP 1+3-CIP 1+p-NP 1+m-NP 1+QL 1+2,4-DCIP 1+PH 1+RSL 1+2,4,6-TCIP 1+o-NP 1+PA

Fig. S31 Picture showing distinct color change from colorless to pink of 1 (10  $\mu$ M) in presence of various analytes in mixed DMF/H<sub>2</sub>O media (6:4, v/v).

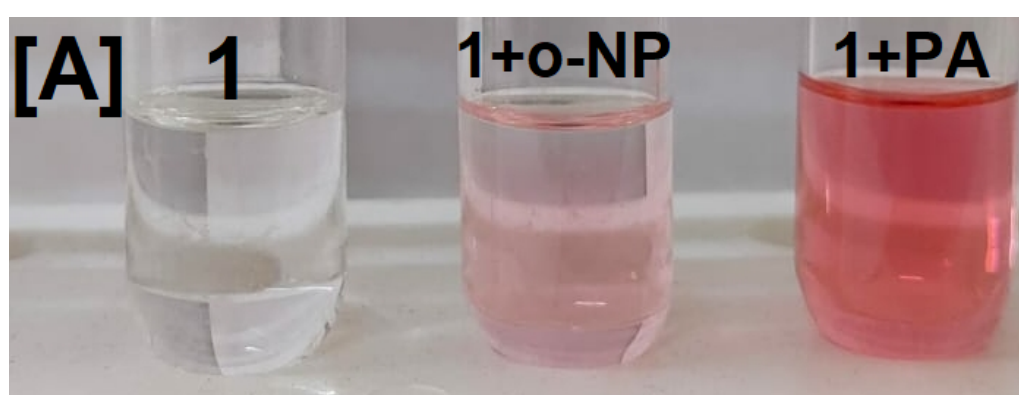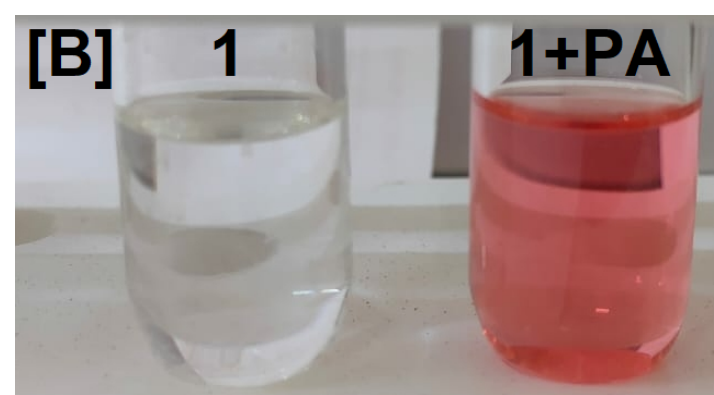



## Supplementary Materials

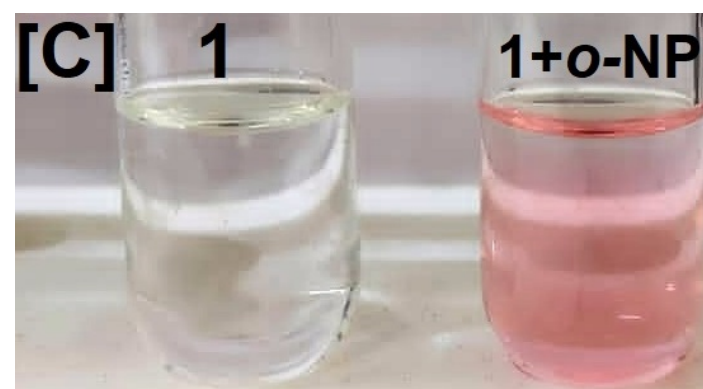

**Fig. S32** Picture showing distinct color change from colorless to pink of **1** (10  $\mu\text{M}$ ) in presence of Picric Acid and orthonitrophenol in mixed DMF/H<sub>2</sub>O media (6:4, v/v).

**Table S3** Fractional atomic coordinates and isotropic or equivalent isotropic displacement parameters ( $\text{\AA}^2$ )

|     | <i>x</i>     | <i>y</i>     | <i>z</i>      | $U_{\text{iso}}^*/U_{\text{eq}}$ |
|-----|--------------|--------------|---------------|----------------------------------|
| O2  | 0.64016 (19) | 0.64908 (16) | 0.23125 (12)  | 0.0639 (4)                       |
| O1  | 0.44116 (16) | 0.2912 (2)   | 0.45763 (13)  | 0.0733 (5)                       |
| O3  | 0.7361 (2)   | 0.85312 (17) | 0.07881 (16)  | 0.0859 (5)                       |
| N2  | 0.89755 (18) | 0.4044 (2)   | 0.33700 (13)  | 0.0517 (4)                       |
| N1  | 0.70815 (18) | 0.38580 (19) | 0.35247 (12)  | 0.0473 (4)                       |
| C15 | 0.7292 (2)   | 0.56125 (19) | 0.05049 (15)  | 0.0428 (4)                       |
| C10 | 0.67588 (19) | 0.4187 (2)   | 0.13127 (14)  | 0.0405 (4)                       |
| C11 | 0.6886 (2)   | 0.2616 (2)   | 0.09718 (15)  | 0.0477 (4)                       |
| H11 | 0.653506     | 0.164608     | 0.151506      | 0.057*                           |
| C2  | 0.7253 (2)   | 0.2050 (2)   | 0.54667 (14)  | 0.0426 (4)                       |
| C14 | 0.7965 (2)   | 0.5525 (2)   | -0.06760 (16) | 0.0498 (4)                       |
| H14 | 0.832421     | 0.649424     | -0.121768     | 0.060*                           |
| C13 | 0.8080 (2)   | 0.3962 (2)   | -0.10159 (16) | 0.0527 (5)                       |
| H13 | 0.851843     | 0.386519     | -0.180283     | 0.063*                           |
| C12 | 0.7553 (2)   | 0.2528 (2)   | -0.02023 (16) | 0.0535 (5)                       |
| H12 | 0.764907     | 0.148018     | -0.045175     | 0.064*                           |
| C3  | 0.6445 (3)   | 0.1009 (2)   | 0.64841 (16)  | 0.0538 (5)                       |
| H3  | 0.516518     | 0.087069     | 0.657205      | 0.065*                           |
| C7  | 0.9170 (2)   | 0.2251 (2)   | 0.53299 (15)  | 0.0435 (4)                       |
| C8  | 0.9928 (2)   | 0.3292 (2)   | 0.42413 (16)  | 0.0513 (5)                       |
| H8  | 1.120774     | 0.343398     | 0.415989      | 0.062*                           |
| C1  | 0.6100 (2)   | 0.2944 (2)   | 0.45241 (15)  | 0.0477 (4)                       |
| C9  | 0.6104 (2)   | 0.4696 (2)   | 0.24962 (15)  | 0.0489 (4)                       |
| H9  | 0.477316     | 0.447494     | 0.265084      | 0.059*                           |
| C6  | 1.0273 (2)   | 0.1421 (2)   | 0.62398 (17)  | 0.0559 (5)                       |
| H6  | 1.155290     | 0.155816     | 0.616696      | 0.067*                           |
| C16 | 0.7064 (3)   | 0.7063 (2)   | 0.11389 (18)  | 0.0576 (5)                       |
| C4  | 0.7556 (3)   | 0.0189 (2)   | 0.73568 (17)  | 0.0594 (5)                       |
| H4  | 0.702531     | -0.051842    | 0.803362      | 0.071*                           |
| C5  | 0.9457 (3)   | 0.0407 (2)   | 0.72359 (17)  | 0.0612 (5)                       |
| H5  | 1.019063     | -0.014169    | 0.783964      | 0.073*                           |

**Table S4** Atomic displacement parameters ( $\text{\AA}^2$ )

|    | $U^{11}$   | $U^{22}$   | $U^{33}$   | $U^{12}$   | $U^{13}$    | $U^{23}$    |
|----|------------|------------|------------|------------|-------------|-------------|
| O2 | 0.0753 (9) | 0.0560 (8) | 0.0652 (9) | 0.0223 (7) | -0.0187 (7) | -0.0210 (6) |

## Supplementary Materials

|     |             |             |             |             |              |             |
|-----|-------------|-------------|-------------|-------------|--------------|-------------|
| O1  | 0.0303 (7)  | 0.1121 (12) | 0.0704 (9)  | -0.0017 (7) | -0.0071 (6)  | 0.0064 (8)  |
| O3  | 0.1173 (13) | 0.0383 (8)  | 0.1042 (12) | 0.0045 (8)  | -0.0355 (10) | -0.0080 (7) |
| N2  | 0.0313 (7)  | 0.0721 (10) | 0.0505 (8)  | 0.0000 (6)  | -0.0041 (6)  | -0.0067 (7) |
| N1  | 0.0318 (7)  | 0.0662 (10) | 0.0432 (8)  | 0.0052 (6)  | -0.0057 (5)  | -0.0068 (6) |
| C15 | 0.0387 (8)  | 0.0383 (8)  | 0.0508 (9)  | 0.0042 (6)  | -0.0151 (7)  | -0.0016 (7) |
| C10 | 0.0315 (7)  | 0.0459 (9)  | 0.0433 (9)  | 0.0026 (6)  | -0.0107 (6)  | -0.0027 (7) |
| C11 | 0.0481 (9)  | 0.0410 (9)  | 0.0523 (10) | -0.0034 (7) | -0.0096 (7)  | 0.0002 (7)  |
| C2  | 0.0375 (8)  | 0.0489 (9)  | 0.0436 (9)  | 0.0030 (7)  | -0.0061 (7)  | -0.0131 (7) |
| C14 | 0.0441 (9)  | 0.0497 (10) | 0.0508 (10) | -0.0008 (7) | -0.0105 (7)  | 0.0078 (7)  |
| C13 | 0.0492 (10) | 0.0629 (11) | 0.0453 (9)  | 0.0068 (8)  | -0.0075 (7)  | -0.0067 (8) |
| C12 | 0.0589 (11) | 0.0468 (10) | 0.0567 (10) | 0.0043 (8)  | -0.0109 (8)  | -0.0119 (8) |
| C3  | 0.0472 (9)  | 0.0571 (11) | 0.0568 (11) | -0.0008 (8) | -0.0029 (8)  | -0.0088 (8) |
| C7  | 0.0362 (8)  | 0.0509 (9)  | 0.0465 (9)  | 0.0047 (7)  | -0.0080 (7)  | -0.0156 (7) |
| C8  | 0.0302 (8)  | 0.0698 (12) | 0.0540 (10) | 0.0000 (7)  | -0.0063 (7)  | -0.0096 (8) |
| C1  | 0.0340 (8)  | 0.0618 (11) | 0.0481 (9)  | 0.0015 (7)  | -0.0044 (7)  | -0.0112 (8) |
| C9  | 0.0389 (8)  | 0.0592 (11) | 0.0488 (10) | 0.0086 (7)  | -0.0100 (7)  | -0.0084 (8) |
| C6  | 0.0428 (9)  | 0.0665 (12) | 0.0609 (11) | 0.0088 (8)  | -0.0169 (8)  | -0.0143 (9) |
| C16 | 0.0617 (11) | 0.0439 (11) | 0.0690 (12) | 0.0102 (8)  | -0.0260 (9)  | -0.0073 (8) |
| C4  | 0.0664 (12) | 0.0541 (11) | 0.0557 (11) | 0.0029 (9)  | -0.0066 (9)  | -0.0033 (8) |
| C5  | 0.0680 (12) | 0.0604 (12) | 0.0562 (11) | 0.0149 (9)  | -0.0209 (9)  | -0.0085 (9) |

**Table S5** Geometric parameters (Å, °)

|             |             |          |             |
|-------------|-------------|----------|-------------|
| O2—C16      | 1.371 (3)   | C2—C1    | 1.465 (2)   |
| O2—C9       | 1.438 (2)   | C14—C13  | 1.371 (3)   |
| O1—C1       | 1.218 (2)   | C14—H14  | 0.9300      |
| O3—C16      | 1.195 (2)   | C13—C12  | 1.382 (3)   |
| N2—C8       | 1.286 (2)   | C13—H13  | 0.9300      |
| N2—N1       | 1.3756 (19) | C12—H12  | 0.9300      |
| N1—C1       | 1.387 (2)   | C3—C4    | 1.374 (2)   |
| N1—C9       | 1.447 (2)   | C3—H3    | 0.9300      |
| C15—C10     | 1.375 (2)   | C7—C6    | 1.401 (2)   |
| C15—C14     | 1.388 (3)   | C7—C8    | 1.436 (2)   |
| C15—C16     | 1.464 (3)   | C8—H8    | 0.9300      |
| C10—C11     | 1.377 (2)   | C9—H9    | 0.9800      |
| C10—C9      | 1.495 (2)   | C6—C5    | 1.368 (3)   |
| C11—C12     | 1.380 (3)   | C6—H6    | 0.9300      |
| C11—H11     | 0.9300      | C4—C5    | 1.383 (3)   |
| C2—C3       | 1.392 (2)   | C4—H4    | 0.9300      |
| C2—C7       | 1.393 (2)   | C5—H5    | 0.9300      |
| C16—O2—C9   | 110.36 (13) | C2—C3—H3 | 120.3       |
| C8—N2—N1    | 116.51 (14) | C2—C7—C6 | 119.22 (16) |
| N2—N1—C1    | 126.57 (13) | C2—C7—C8 | 117.86 (14) |
| N2—N1—C9    | 113.50 (13) | C6—C7—C8 | 122.91 (15) |
| C1—N1—C9    | 119.90 (14) | N2—C8—C7 | 125.06 (15) |
| C10—C15—C14 | 121.57 (15) | N2—C8—H8 | 117.5       |
| C10—C15—C16 | 107.96 (16) | C7—C8—H8 | 117.5       |
| C14—C15—C16 | 130.44 (16) | O1—C1—N1 | 120.74 (16) |
| C15—C10—C11 | 120.65 (15) | O1—C1—C2 | 124.45 (16) |

## Supplementary Materials

|             |             |            |             |
|-------------|-------------|------------|-------------|
| C15—C10—C9  | 108.70 (15) | N1—C1—C2   | 114.81 (14) |
| C11—C10—C9  | 130.64 (15) | O2—C9—N1   | 110.16 (13) |
| C10—C11—C12 | 117.82 (15) | O2—C9—C10  | 104.54 (13) |
| C10—C11—H11 | 121.1       | N1—C9—C10  | 114.04 (13) |
| C12—C11—H11 | 121.1       | O2—C9—H9   | 109.3       |
| C3—C2—C7    | 120.40 (15) | N1—C9—H9   | 109.3       |
| C3—C2—C1    | 120.51 (15) | C10—C9—H9  | 109.3       |
| C7—C2—C1    | 119.09 (15) | C5—C6—C7   | 119.66 (17) |
| C13—C14—C15 | 117.70 (15) | C5—C6—H6   | 120.2       |
| C13—C14—H14 | 121.2       | C7—C6—H6   | 120.2       |
| C15—C14—H14 | 121.2       | O3—C16—O2  | 121.08 (18) |
| C14—C13—C12 | 120.74 (17) | O3—C16—C15 | 130.6 (2)   |
| C14—C13—H13 | 119.6       | O2—C16—C15 | 108.35 (15) |
| C12—C13—H13 | 119.6       | C3—C4—C5   | 120.46 (18) |
| C11—C12—C13 | 121.52 (17) | C3—C4—H4   | 119.8       |
| C11—C12—H12 | 119.2       | C5—C4—H4   | 119.8       |
| C13—C12—H12 | 119.2       | C6—C5—C4   | 120.87 (17) |
| C4—C3—C2    | 119.37 (17) | C6—C5—H5   | 119.6       |
| C4—C3—H3    | 120.3       | C4—C5—H5   | 119.6       |

**Table S6** Major Peak profiles and its  $2\theta$  / (Degree) corresponding with Indexing of (h.k.l.) value of Probe 2.

| Sr. No. | 2 Theta | D spacing | h  | k  | l |
|---------|---------|-----------|----|----|---|
| 1       | 8.039   | 10.9892   | 0  | 0  | 1 |
| 2       | 11.187  | 7.9030    | 0  | 1  | 0 |
| 3       | 12.274  | 7.2052    | 1  | 0  | 0 |
| 4       | 12.621  | 7.0083    | 0  | 1  | 1 |
| 5       | 14.250  | 6.2102    | 1  | 0  | 1 |
| 6       | 14.871  | 5.9525    | 0  | -1 | 1 |
| 7       | 15.116  | 5.8564    | -1 | 0  | 1 |
| 8       | 16.118  | 5.4946    | 0  | 0  | 2 |
| 9       | 16.533  | 5.3575    | 1  | 1  | 0 |
| 10      | 16.739  | 5.2921    | -1 | 1  | 0 |
| 11      | 17.175  | 5.1588    | 1  | 1  | 1 |
| 12      | 18.006  | 4.9224    | 0  | 1  | 2 |
| 13      | 18.094  | 4.8989    | -1 | 1  | 1 |
| 14      | 19.083  | 4.6471    | 1  | -1 | 1 |
| 15      | 19.568  | 4.5330    | -1 | -1 | 1 |
| 16      | 19.667  | 4.5103    | 1  | 0  | 2 |
| 17      | 20.932  | 4.2405    | -1 | 0  | 2 |
| 18      | 21.171  | 4.1932    | 1  | 1  | 2 |
| 19      | 21.194  | 4.1886    | 0  | -1 | 2 |
| 20      | 22.482  | 3.9515    | 0  | 2  | 0 |
| 21      | 22.509  | 3.9469    | -1 | 1  | 2 |
| 22      | 22.556  | 3.9387    | 0  | 2  | 1 |
| 23      | 24.102  | 3.6894    | 1  | -1 | 2 |
| 24      | 24.279  | 3.6631    | 0  | 0  | 3 |
| 25      | 24.692  | 3.6026    | 2  | 0  | 0 |
| 26      | 24.967  | 3.5636    | 0  | 1  | 3 |
| 27      | 25.017  | 3.5566    | -1 | -1 | 2 |
| 28      | 25.198  | 3.5314    | 0  | -2 | 1 |
| 29      | 25.366  | 3.5084    | 1  | 2  | 1 |
| 30      | 25.398  | 3.5041    | 0  | 2  | 2 |
| 31      | 25.502  | 3.4900    | 2  | 0  | 1 |
| 32      | 25.556  | 3.4828    | 1  | 2  | 0 |
| 33      | 25.827  | 3.4468    | -1 | 2  | 0 |
| 34      | 26.142  | 3.4060    | -1 | 2  | 1 |
| 35      | 26.503  | 3.3604    | -2 | 0  | 1 |
| 36      | 26.563  | 3.3530    | 1  | 0  | 3 |
| 37      | 27.052  | 3.2934    | 2  | 1  | 0 |
| 38      | 27.133  | 3.2839    | 1  | 1  | 3 |
| 39      | 27.220  | 3.2736    | 2  | 1  | 1 |
| 40      | 27.310  | 3.2629    | -2 | 1  | 0 |
| 41      | 27.705  | 3.2173    | 1  | 2  | 2 |
| 42      | 27.999  | 3.1842    | -1 | 0  | 3 |
| 43      | 28.010  | 3.1830    | 1  | -2 | 1 |
| 44      | 28.225  | 3.1592    | -1 | -2 | 1 |

## Supplementary Materials

|     |        |        |    |    |   |
|-----|--------|--------|----|----|---|
| 45  | 28.412 | 3.1388 | -2 | 1  | 1 |
| 46  | 28.531 | 3.1260 | 0  | -1 | 3 |
| 47  | 28.613 | 3.1172 | 2  | -1 | 1 |
| 48  | 28.665 | 3.1117 | -1 | 1  | 3 |
| 49  | 28.727 | 3.1051 | 2  | 0  | 2 |
| 50  | 28.880 | 3.0891 | -1 | 2  | 2 |
| 51  | 29.276 | 3.0481 | -2 | -1 | 1 |
| 52  | 29.741 | 3.0015 | 2  | 1  | 2 |
| 53  | 30.000 | 2.9762 | 0  | -2 | 2 |
| 54  | 30.282 | 2.9491 | 0  | 2  | 3 |
| 55  | 30.504 | 2.9282 | -2 | 0  | 2 |
| 56  | 30.579 | 2.9212 | 1  | -1 | 3 |
| 57  | 31.690 | 2.8212 | -2 | 1  | 2 |
| 58  | 31.737 | 2.8172 | -1 | -1 | 3 |
| 59  | 32.053 | 2.7901 | 2  | -1 | 2 |
| 60  | 32.063 | 2.7892 | 1  | 2  | 3 |
| 61  | 32.224 | 2.7757 | 1  | -2 | 2 |
| 62  | 32.566 | 2.7473 | 0  | 0  | 4 |
| 63  | 32.602 | 2.7443 | 0  | 1  | 4 |
| 64  | 32.821 | 2.7265 | -1 | -2 | 2 |
| 65  | 33.075 | 2.7062 | 2  | 2  | 1 |
| 66  | 33.424 | 2.6787 | 2  | 2  | 0 |
| 67  | 33.458 | 2.6761 | -2 | -1 | 2 |
| 68  | 33.497 | 2.6731 | -1 | 2  | 3 |
| 69  | 33.575 | 2.6671 | 0  | 3  | 1 |
| 70  | 33.735 | 2.6547 | 2  | 0  | 3 |
| 71  | 33.849 | 2.6461 | -2 | 2  | 0 |
| 72  | 34.004 | 2.6343 | 0  | 3  | 0 |
| 73  | 34.132 | 2.6248 | 1  | 1  | 4 |
| 74  | 34.143 | 2.6239 | 2  | 1  | 3 |
| 75  | 34.150 | 2.6234 | 1  | 0  | 4 |
| 76  | 34.291 | 2.6129 | -2 | 2  | 1 |
| 77  | 34.751 | 2.5794 | 2  | 2  | 2 |
| 78  | 35.147 | 2.5513 | 0  | 3  | 2 |
| 79  | 35.395 | 2.5340 | 2  | -2 | 1 |
| 80  | 35.535 | 2.5243 | 1  | 3  | 1 |
| 81  | 35.684 | 2.5141 | -1 | 0  | 4 |
| 82  | 35.744 | 2.5100 | -2 | -2 | 1 |
| 83  | 35.767 | 2.5084 | -1 | 1  | 4 |
| 84  | 36.037 | 2.4902 | -2 | 0  | 3 |
| 85  | 36.130 | 2.4841 | 1  | 3  | 0 |
| 86  | 36.142 | 2.4833 | 0  | -2 | 3 |
| 87  | 36.211 | 2.4787 | -1 | 3  | 1 |
| 88  | 36.373 | 2.4680 | 0  | -3 | 1 |
| 89  | 36.380 | 2.4676 | 0  | -1 | 4 |
| 90  | 36.429 | 2.4644 | -1 | 3  | 0 |
| 91  | 36.477 | 2.4612 | 0  | 2  | 4 |
| 92  | 36.621 | 2.4519 | -2 | 1  | 3 |
| 93  | 36.659 | 2.4494 | -2 | 2  | 2 |
| 94  | 36.851 | 2.4371 | 1  | 3  | 2 |
| 95  | 37.100 | 2.4213 | 2  | -1 | 3 |
| 96  | 37.414 | 2.4017 | 3  | 0  | 0 |
| 97  | 37.797 | 2.3783 | 3  | 0  | 1 |
| 98  | 37.822 | 2.3767 | 1  | 2  | 4 |
| 99  | 37.866 | 2.3741 | -1 | 3  | 2 |
| 100 | 37.869 | 2.3739 | 1  | -2 | 3 |
| 101 | 37.871 | 2.3738 | 1  | -1 | 4 |
| 102 | 38.218 | 2.3530 | 2  | 2  | 3 |
| 103 | 38.493 | 2.3368 | 1  | -3 | 1 |
| 104 | 38.506 | 2.3361 | 0  | 3  | 3 |
| 105 | 38.562 | 2.3328 | -1 | -3 | 1 |
| 106 | 38.722 | 2.3236 | 2  | -2 | 2 |
| 107 | 38.741 | 2.3225 | -1 | -2 | 3 |
| 108 | 38.858 | 2.3157 | -3 | 0  | 1 |
| 109 | 38.977 | 2.3089 | 3  | 1  | 1 |
| 110 | 39.030 | 2.3059 | 3  | 1  | 0 |
| 111 | 39.044 | 2.3051 | -2 | -1 | 3 |
| 112 | 39.186 | 2.2971 | -1 | -1 | 4 |
| 113 | 39.310 | 2.2901 | -3 | 1  | 0 |
| 114 | 39.417 | 2.2842 | -1 | 2  | 4 |
| 115 | 39.737 | 2.2665 | -2 | -2 | 2 |
| 116 | 39.884 | 2.2585 | 2  | 1  | 4 |
| 117 | 39.917 | 2.2567 | 1  | 3  | 3 |
| 118 | 39.946 | 2.2551 | 2  | 0  | 4 |
| 119 | 39.964 | 2.2542 | 3  | 0  | 2 |
| 120 | 40.095 | 2.2471 | 3  | -1 | 1 |
| 121 | 40.286 | 2.2369 | -3 | 1  | 1 |
| 122 | 40.386 | 2.2315 | 0  | -3 | 2 |
| 123 | 40.654 | 2.2175 | 0  | 1  | 5 |
| 124 | 40.662 | 2.2171 | -2 | 2  | 3 |
| 125 | 40.683 | 2.2159 | 3  | 1  | 2 |
| 126 | 40.837 | 2.2080 | -3 | -1 | 1 |
| 127 | 41.034 | 2.1978 | 0  | 0  | 5 |

## Supplementary Materials

|     |        |        |    |    |   |
|-----|--------|--------|----|----|---|
| 128 | 41.201 | 2.1893 | -1 | 3  | 3 |
| 129 | 41.527 | 2.1729 | 2  | 3  | 1 |
| 130 | 41.765 | 2.1610 | 1  | 1  | 5 |
| 131 | 41.972 | 2.1508 | -3 | 0  | 2 |
| 132 | 42.173 | 2.1411 | 1  | -3 | 2 |
| 133 | 42.180 | 2.1407 | 1  | 0  | 5 |
| 134 | 42.214 | 2.1391 | 2  | 3  | 0 |
| 135 | 42.524 | 2.1242 | 2  | 3  | 2 |
| 136 | 42.559 | 2.1225 | 3  | -1 | 2 |
| 137 | 42.562 | 2.1224 | -1 | -3 | 2 |
| 138 | 42.607 | 2.1202 | -2 | 0  | 4 |
| 139 | 42.708 | 2.1154 | -2 | 3  | 1 |
| 140 | 42.722 | 2.1148 | -2 | 1  | 4 |
| 141 | 42.737 | 2.1141 | -2 | 3  | 0 |
| 142 | 42.923 | 2.1053 | -3 | 1  | 2 |
| 143 | 43.111 | 2.0966 | 2  | 2  | 4 |
| 144 | 43.161 | 2.0943 | 0  | -2 | 4 |
| 145 | 43.284 | 2.0886 | 2  | -1 | 4 |
| 146 | 43.302 | 2.0878 | 0  | 3  | 4 |
| 147 | 43.398 | 2.0834 | 3  | 2  | 1 |
| 148 | 43.472 | 2.0800 | -1 | 1  | 5 |
| 149 | 43.485 | 2.0795 | 2  | -2 | 3 |
| 150 | 43.533 | 2.0773 | 0  | 2  | 5 |
| 151 | 43.692 | 2.0701 | 3  | 0  | 3 |
| 152 | 43.789 | 2.0657 | -1 | 0  | 5 |
| 153 | 43.834 | 2.0637 | 3  | 2  | 0 |
| 154 | 43.979 | 2.0572 | 3  | 1  | 3 |
| 155 | 44.219 | 2.0466 | -3 | -1 | 2 |
| 156 | 44.315 | 2.0424 | -2 | 3  | 2 |
| 157 | 44.342 | 2.0412 | -3 | 2  | 0 |
| 158 | 44.399 | 2.0387 | 2  | -3 | 1 |
| 159 | 44.431 | 2.0373 | 1  | 3  | 4 |
| 160 | 44.503 | 2.0342 | 1  | -2 | 4 |
| 161 | 44.521 | 2.0334 | -2 | -3 | 1 |
| 162 | 44.543 | 2.0325 | 1  | 2  | 5 |
| 163 | 44.586 | 2.0306 | 3  | 2  | 2 |
| 164 | 44.602 | 2.0299 | 0  | -1 | 5 |
| 165 | 44.851 | 2.0192 | -3 | 2  | 1 |
| 166 | 45.034 | 2.0115 | -2 | -2 | 3 |
| 167 | 45.115 | 2.0080 | 2  | 3  | 3 |
| 168 | 45.184 | 2.0051 | 0  | 4  | 1 |
| 169 | 45.431 | 1.9948 | 3  | -2 | 1 |
| 170 | 45.577 | 1.9887 | -1 | -2 | 4 |
| 171 | 45.623 | 1.9869 | -2 | -1 | 4 |
| 172 | 45.688 | 1.9842 | 0  | -3 | 3 |
| 173 | 45.717 | 1.9830 | 1  | -1 | 5 |
| 174 | 45.857 | 1.9772 | -3 | -2 | 1 |
| 175 | 45.894 | 1.9758 | 0  | 4  | 0 |
| 176 | 45.918 | 1.9748 | -1 | 3  | 4 |
| 177 | 45.950 | 1.9735 | -2 | 2  | 4 |
| 178 | 46.052 | 1.9693 | 0  | 4  | 2 |
| 179 | 46.249 | 1.9614 | -1 | 2  | 5 |
| 180 | 46.481 | 1.9521 | -3 | 0  | 3 |
| 181 | 46.487 | 1.9519 | 3  | -1 | 3 |
| 182 | 46.576 | 1.9484 | 2  | 1  | 5 |
| 183 | 46.690 | 1.9439 | 1  | 4  | 1 |
| 184 | 46.917 | 1.9350 | -3 | 2  | 2 |
| 185 | 46.996 | 1.9319 | -3 | 1  | 3 |
| 186 | 46.997 | 1.9319 | 2  | 0  | 5 |
| 187 | 47.150 | 1.9260 | -1 | -1 | 5 |
| 188 | 47.164 | 1.9255 | 1  | -3 | 3 |
| 189 | 47.302 | 1.9202 | 3  | 2  | 3 |
| 190 | 47.313 | 1.9198 | -1 | 4  | 1 |
| 191 | 47.388 | 1.9169 | 1  | 4  | 2 |
| 192 | 47.426 | 1.9154 | -2 | 3  | 3 |
| 193 | 47.531 | 1.9114 | 1  | 4  | 0 |
| 194 | 47.559 | 1.9104 | 2  | -3 | 2 |
| 195 | 47.817 | 1.9007 | -1 | -3 | 3 |
| 196 | 47.850 | 1.8995 | -1 | 4  | 0 |
| 197 | 48.033 | 1.8926 | 3  | -2 | 2 |
| 198 | 48.125 | 1.8892 | 0  | -4 | 1 |
| 199 | 48.265 | 1.8841 | -2 | -3 | 2 |
| 200 | 48.297 | 1.8829 | -1 | 4  | 2 |
| 201 | 48.430 | 1.8780 | 0  | 4  | 3 |
| 202 | 48.607 | 1.8716 | 3  | 1  | 4 |
| 203 | 48.699 | 1.8683 | 3  | 0  | 4 |
| 204 | 48.918 | 1.8604 | -3 | -1 | 3 |
| 205 | 49.063 | 1.8553 | 0  | 1  | 6 |
| 206 | 49.099 | 1.8540 | 2  | 2  | 5 |
| 207 | 49.102 | 1.8539 | 2  | 3  | 4 |
| 208 | 49.209 | 1.8501 | 0  | 3  | 5 |
| 209 | 49.316 | 1.8464 | -3 | -2 | 2 |
| 210 | 49.363 | 1.8447 | 2  | -2 | 4 |

## Supplementary Materials

|     |        |        |    |    |   |
|-----|--------|--------|----|----|---|
| 211 | 49.573 | 1.8374 | 1  | 4  | 3 |
| 212 | 49.681 | 1.8336 | -2 | 1  | 5 |
| 213 | 49.742 | 1.8315 | 0  | 0  | 6 |
| 214 | 49.851 | 1.8278 | -1 | -4 | 1 |
| 215 | 49.872 | 1.8271 | 1  | -4 | 1 |
| 216 | 49.882 | 1.8267 | 1  | 1  | 6 |
| 217 | 49.929 | 1.8251 | -2 | 0  | 5 |
| 218 | 50.091 | 1.8196 | 1  | 3  | 5 |
| 219 | 50.306 | 1.8123 | 2  | -1 | 5 |
| 220 | 50.372 | 1.8101 | 3  | 3  | 1 |
| 221 | 50.394 | 1.8094 | -3 | 2  | 3 |
| 222 | 50.591 | 1.8028 | 1  | 0  | 6 |
| 223 | 50.635 | 1.8013 | 4  | 0  | 0 |
| 224 | 50.737 | 1.7979 | -1 | 4  | 3 |
| 225 | 50.795 | 1.7960 | 4  | 0  | 1 |
| 226 | 50.827 | 1.7950 | 0  | -2 | 5 |
| 227 | 51.092 | 1.7863 | 3  | 3  | 2 |
| 228 | 51.105 | 1.7858 | 3  | 3  | 0 |
| 229 | 51.229 | 1.7818 | 0  | 2  | 6 |
| 230 | 51.337 | 1.7783 | -2 | -2 | 4 |
| 231 | 51.360 | 1.7776 | 3  | 2  | 4 |
| 232 | 51.586 | 1.7703 | 2  | 4  | 1 |
| 233 | 51.625 | 1.7691 | 3  | -1 | 4 |
| 234 | 51.657 | 1.7680 | -1 | 1  | 6 |
| 235 | 51.698 | 1.7668 | 4  | 1  | 1 |
| 236 | 51.731 | 1.7657 | 0  | -4 | 2 |
| 237 | 51.733 | 1.7656 | -1 | 3  | 5 |
| 238 | 51.783 | 1.7640 | -3 | 3  | 0 |
| 239 | 51.836 | 1.7624 | -2 | 3  | 4 |
| 240 | 51.877 | 1.7611 | 1  | -2 | 5 |
| 241 | 51.880 | 1.7610 | 4  | 1  | 0 |
| 242 | 51.898 | 1.7604 | -3 | 3  | 1 |
| 243 | 51.919 | 1.7597 | -4 | 0  | 1 |
| 244 | 51.977 | 1.7579 | 3  | -2 | 3 |
| 245 | 51.985 | 1.7577 | 1  | 2  | 6 |
| 246 | 51.992 | 1.7574 | 0  | -3 | 4 |
| 247 | 52.010 | 1.7569 | 2  | -3 | 3 |
| 248 | 52.096 | 1.7542 | 2  | 4  | 2 |
| 249 | 52.116 | 1.7535 | -3 | 0  | 4 |
| 250 | 52.163 | 1.7521 | 0  | 4  | 4 |
| 251 | 52.179 | 1.7516 | -4 | 1  | 0 |
| 252 | 52.241 | 1.7496 | -2 | 2  | 5 |
| 253 | 52.252 | 1.7493 | -3 | 1  | 4 |
| 254 | 52.274 | 1.7486 | -1 | 0  | 6 |
| 255 | 52.391 | 1.7450 | 4  | 0  | 2 |
| 256 | 52.507 | 1.7414 | 2  | 4  | 0 |
| 257 | 52.673 | 1.7363 | 4  | -1 | 1 |
| 258 | 52.739 | 1.7343 | -2 | 4  | 1 |
| 259 | 52.940 | 1.7282 | 4  | 1  | 2 |
| 260 | 52.955 | 1.7277 | -2 | -1 | 5 |
| 261 | 53.090 | 1.7237 | 3  | -3 | 1 |
| 262 | 53.098 | 1.7234 | -2 | 4  | 0 |
| 263 | 53.103 | 1.7233 | -4 | 1  | 1 |
| 264 | 53.111 | 1.7230 | 1  | 4  | 4 |
| 265 | 53.111 | 1.7230 | -1 | -2 | 5 |
| 266 | 53.185 | 1.7208 | 0  | -1 | 6 |
| 267 | 53.199 | 1.7204 | 1  | -3 | 4 |
| 268 | 53.222 | 1.7197 | -2 | -3 | 3 |
| 269 | 53.225 | 1.7196 | 3  | 3  | 3 |
| 270 | 53.250 | 1.7188 | -3 | -3 | 1 |
| 271 | 53.254 | 1.7187 | 1  | -4 | 2 |
| 272 | 53.428 | 1.7136 | -3 | 3  | 2 |
| 273 | 53.476 | 1.7121 | -4 | -1 | 1 |
| 274 | 53.507 | 1.7112 | -1 | -4 | 2 |
| 275 | 53.783 | 1.7031 | -1 | 2  | 6 |
| 276 | 53.786 | 1.7030 | -2 | 4  | 2 |
| 277 | 54.000 | 1.6967 | 2  | 1  | 6 |
| 278 | 54.006 | 1.6966 | 2  | 4  | 3 |
| 279 | 54.007 | 1.6965 | -3 | -2 | 3 |
| 280 | 54.031 | 1.6958 | 1  | -1 | 6 |
| 281 | 54.070 | 1.6947 | -1 | -3 | 4 |
| 282 | 54.260 | 1.6892 | 2  | 3  | 5 |
| 283 | 54.325 | 1.6873 | 3  | 1  | 5 |
| 284 | 54.490 | 1.6826 | -1 | 4  | 4 |
| 285 | 54.558 | 1.6807 | 4  | -1 | 2 |
| 286 | 54.575 | 1.6802 | -4 | 0  | 2 |
| 287 | 54.694 | 1.6768 | -3 | -1 | 4 |
| 288 | 54.706 | 1.6765 | 2  | 0  | 6 |
| 289 | 54.738 | 1.6756 | 3  | 0  | 5 |
| 290 | 54.806 | 1.6737 | -2 | -4 | 1 |
| 291 | 54.845 | 1.6726 | 2  | -4 | 1 |
| 292 | 55.089 | 1.6657 | -3 | 2  | 4 |
| 293 | 55.282 | 1.6604 | 4  | 2  | 1 |

## Supplementary Materials

|     |        |        |    |    |   |
|-----|--------|--------|----|----|---|
| 294 | 55.334 | 1.6589 | 4  | 0  | 3 |
| 295 | 55.395 | 1.6572 | -4 | 1  | 2 |
| 296 | 55.539 | 1.6533 | 4  | 1  | 3 |
| 297 | 55.570 | 1.6525 | -1 | -1 | 6 |
| 298 | 55.748 | 1.6476 | 3  | -3 | 2 |
| 299 | 55.780 | 1.6467 | 4  | 2  | 0 |
| 300 | 55.957 | 1.6419 | 2  | 2  | 6 |
| 301 | 55.999 | 1.6408 | 0  | 3  | 6 |
| 302 | 56.129 | 1.6373 | 2  | -2 | 5 |
| 303 | 56.149 | 1.6368 | 4  | 2  | 2 |
| 304 | 56.186 | 1.6358 | -2 | 4  | 3 |
| 305 | 56.292 | 1.6330 | -3 | 3  | 3 |
| 306 | 56.348 | 1.6315 | -4 | 2  | 0 |
| 307 | 56.402 | 1.6300 | -4 | -1 | 2 |
| 308 | 56.526 | 1.6268 | 0  | -4 | 3 |
| 309 | 56.560 | 1.6258 | 3  | 2  | 5 |
| 310 | 56.659 | 1.6233 | 3  | 3  | 4 |
| 311 | 56.676 | 1.6228 | 1  | 3  | 6 |
| 312 | 56.695 | 1.6223 | -3 | -3 | 2 |
| 313 | 56.908 | 1.6168 | -4 | 2  | 1 |
| 314 | 57.069 | 1.6126 | 0  | 4  | 5 |
| 315 | 57.071 | 1.6125 | 3  | -2 | 4 |
| 316 | 57.136 | 1.6108 | 4  | -2 | 1 |
| 317 | 57.221 | 1.6086 | 2  | 4  | 4 |
| 318 | 57.331 | 1.6058 | -2 | 1  | 6 |
| 319 | 57.341 | 1.6056 | -2 | 3  | 5 |
| 320 | 57.419 | 1.6036 | 0  | 5  | 1 |
| 321 | 57.549 | 1.6002 | 2  | -3 | 4 |
| 322 | 57.619 | 1.5985 | -4 | -2 | 1 |
| 323 | 57.741 | 1.5954 | 4  | -1 | 3 |
| 324 | 57.761 | 1.5949 | 3  | -1 | 5 |
| 325 | 57.832 | 1.5931 | 1  | 4  | 5 |
| 326 | 57.833 | 1.5931 | 1  | -4 | 3 |
| 327 | 57.837 | 1.5930 | 0  | 5  | 2 |
| 328 | 57.850 | 1.5926 | 0  | 1  | 7 |
| 329 | 57.872 | 1.5921 | -2 | 0  | 6 |
| 330 | 57.895 | 1.5915 | 2  | -4 | 2 |
| 331 | 58.012 | 1.5886 | 2  | -1 | 6 |
| 332 | 58.331 | 1.5806 | -1 | -4 | 3 |
| 333 | 58.333 | 1.5806 | 0  | 5  | 0 |
| 334 | 58.339 | 1.5805 | 4  | 2  | 3 |
| 335 | 58.374 | 1.5796 | -2 | -4 | 2 |
| 336 | 58.445 | 1.5778 | -1 | 3  | 6 |
| 337 | 58.453 | 1.5776 | 1  | 1  | 7 |
| 338 | 58.457 | 1.5775 | -2 | -2 | 5 |
| 339 | 58.477 | 1.5770 | -4 | 0  | 3 |
| 340 | 58.489 | 1.5767 | -3 | 1  | 5 |
| 341 | 58.660 | 1.5726 | 1  | 5  | 1 |
| 342 | 58.770 | 1.5699 | 0  | 0  | 7 |
| 343 | 58.790 | 1.5694 | -4 | 2  | 2 |
| 344 | 58.944 | 1.5657 | 1  | 5  | 2 |
| 345 | 58.950 | 1.5655 | -4 | 1  | 3 |
| 346 | 59.054 | 1.5630 | 0  | -2 | 6 |
| 347 | 59.114 | 1.5616 | 0  | -3 | 5 |
| 348 | 59.196 | 1.5596 | -2 | -3 | 4 |
| 349 | 59.237 | 1.5586 | 4  | -2 | 2 |
| 350 | 59.260 | 1.5581 | -1 | 5  | 1 |
| 351 | 59.269 | 1.5578 | 3  | 4  | 1 |
| 352 | 59.353 | 1.5558 | -2 | 2  | 6 |
| 353 | 59.377 | 1.5553 | 4  | 1  | 4 |
| 354 | 59.393 | 1.5549 | -1 | 4  | 5 |
| 355 | 59.401 | 1.5547 | 1  | 0  | 7 |
| 356 | 59.483 | 1.5528 | 0  | 2  | 7 |
| 357 | 59.492 | 1.5525 | 4  | 0  | 4 |
| 358 | 59.567 | 1.5508 | 0  | 5  | 3 |
| 359 | 59.606 | 1.5498 | 3  | 4  | 2 |
| 360 | 59.639 | 1.5490 | 3  | -3 | 3 |
| 361 | 59.689 | 1.5479 | 1  | 5  | 0 |
| 362 | 59.747 | 1.5465 | -3 | -2 | 4 |
| 363 | 59.796 | 1.5454 | -1 | 5  | 2 |
| 364 | 59.831 | 1.5445 | -2 | 4  | 4 |
| 365 | 59.878 | 1.5434 | 1  | -2 | 6 |
| 366 | 60.029 | 1.5399 | -1 | 5  | 0 |
| 367 | 60.042 | 1.5396 | 1  | 2  | 7 |
| 368 | 60.099 | 1.5383 | 1  | -3 | 5 |
| 369 | 60.236 | 1.5351 | 3  | 4  | 0 |
| 370 | 60.306 | 1.5335 | -1 | 1  | 7 |
| 371 | 60.368 | 1.5321 | -3 | 3  | 4 |
| 372 | 60.407 | 1.5312 | 2  | 3  | 6 |
| 373 | 60.529 | 1.5284 | 1  | 5  | 3 |
| 374 | 60.535 | 1.5283 | -4 | -1 | 3 |
| 375 | 60.539 | 1.5282 | 0  | -5 | 1 |
| 376 | 60.720 | 1.5240 | -4 | -2 | 2 |

## Supplementary Materials

|     |        |        |    |    |   |
|-----|--------|--------|----|----|---|
| 377 | 60.827 | 1.5216 | -3 | 2  | 5 |
| 378 | 60.844 | 1.5212 | -3 | 4  | 1 |
| 379 | 60.932 | 1.5193 | -2 | -1 | 6 |
| 380 | 60.955 | 1.5187 | 3  | 1  | 6 |
| 381 | 61.047 | 1.5167 | -3 | 4  | 0 |
| 382 | 61.155 | 1.5142 | -1 | -3 | 5 |
| 383 | 61.170 | 1.5139 | -1 | 0  | 7 |
| 384 | 61.233 | 1.5125 | 4  | 3  | 1 |
| 385 | 61.236 | 1.5124 | 3  | 4  | 3 |
| 386 | 61.254 | 1.5120 | 3  | 3  | 5 |
| 387 | 61.255 | 1.5120 | -1 | -2 | 6 |
| 388 | 61.300 | 1.5110 | -3 | -3 | 3 |
| 389 | 61.374 | 1.5094 | -3 | -1 | 5 |
| 390 | 61.611 | 1.5041 | 2  | 4  | 5 |
| 391 | 61.617 | 1.5040 | -1 | 5  | 3 |
| 392 | 61.643 | 1.5034 | 3  | 0  | 6 |
| 393 | 61.743 | 1.5012 | 4  | 3  | 2 |
| 394 | 61.764 | 1.5008 | 4  | 2  | 4 |
| 395 | 61.919 | 1.4974 | -4 | 2  | 3 |
| 396 | 61.925 | 1.4972 | -3 | 4  | 2 |
| 397 | 61.933 | 1.4971 | -1 | 2  | 7 |
| 398 | 61.990 | 1.4958 | -1 | -5 | 1 |
| 399 | 62.003 | 1.4955 | 4  | 3  | 0 |
| 400 | 62.061 | 1.4943 | 2  | 1  | 7 |
| 401 | 62.075 | 1.4940 | 1  | -5 | 1 |
| 402 | 62.099 | 1.4935 | 4  | -1 | 4 |
| 403 | 62.128 | 1.4928 | 2  | -4 | 3 |
| 404 | 62.172 | 1.4919 | 0  | -1 | 7 |
| 405 | 62.348 | 1.4881 | 0  | -4 | 4 |
| 406 | 62.471 | 1.4855 | -3 | -4 | 1 |
| 407 | 62.526 | 1.4843 | 3  | -4 | 1 |
| 408 | 62.544 | 1.4839 | 0  | 5  | 4 |
| 409 | 62.569 | 1.4834 | 4  | -2 | 3 |
| 410 | 62.740 | 1.4798 | 3  | 2  | 6 |
| 411 | 62.801 | 1.4785 | -4 | 3  | 0 |
| 412 | 62.816 | 1.4781 | 1  | -1 | 7 |
| 413 | 62.869 | 1.4770 | 2  | 5  | 1 |
| 414 | 62.987 | 1.4745 | 0  | 4  | 6 |
| 415 | 63.009 | 1.4741 | 2  | 0  | 7 |
| 416 | 63.019 | 1.4739 | 2  | 5  | 2 |
| 417 | 63.025 | 1.4737 | -4 | 3  | 1 |
| 418 | 63.080 | 1.4726 | -2 | -4 | 3 |
| 419 | 63.155 | 1.4710 | 3  | -2 | 5 |
| 420 | 63.356 | 1.4668 | 1  | 5  | 4 |
| 421 | 63.458 | 1.4647 | 1  | -4 | 4 |
| 422 | 63.488 | 1.4641 | -4 | 0  | 4 |
| 423 | 63.516 | 1.4635 | 4  | 3  | 3 |
| 424 | 63.548 | 1.4629 | 0  | 3  | 7 |
| 425 | 63.562 | 1.4626 | 2  | 2  | 7 |
| 426 | 63.584 | 1.4621 | 1  | 4  | 6 |
| 427 | 63.641 | 1.4610 | -4 | 1  | 4 |
| 428 | 63.658 | 1.4606 | 2  | -2 | 6 |
| 429 | 63.787 | 1.4580 | -2 | 3  | 6 |
| 430 | 63.837 | 1.4569 | 4  | -3 | 1 |
| 431 | 63.959 | 1.4545 | 0  | -5 | 2 |
| 432 | 63.980 | 1.4540 | 2  | 5  | 0 |
| 433 | 64.018 | 1.4532 | -2 | 5  | 1 |
| 434 | 64.026 | 1.4531 | 2  | -3 | 5 |
| 435 | 64.028 | 1.4531 | -4 | -3 | 1 |
| 436 | 64.053 | 1.4525 | 1  | 3  | 7 |
| 437 | 64.174 | 1.4501 | -1 | -4 | 4 |
| 438 | 64.252 | 1.4485 | -3 | 4  | 3 |
| 439 | 64.325 | 1.4471 | 4  | 1  | 5 |
| 440 | 64.423 | 1.4451 | 2  | 5  | 3 |
| 441 | 64.465 | 1.4443 | -1 | -1 | 7 |
| 442 | 64.503 | 1.4435 | -4 | 3  | 2 |
| 443 | 64.600 | 1.4416 | -2 | 4  | 5 |
| 444 | 64.626 | 1.4410 | 5  | 0  | 0 |
| 445 | 64.633 | 1.4409 | -2 | 5  | 0 |
| 446 | 64.634 | 1.4409 | 3  | -3 | 4 |
| 447 | 64.642 | 1.4407 | 5  | 0  | 1 |
| 448 | 64.653 | 1.4405 | -2 | 5  | 2 |
| 449 | 64.660 | 1.4404 | -1 | 5  | 4 |
| 450 | 64.730 | 1.4390 | 4  | 0  | 5 |
| 451 | 64.979 | 1.4341 | -4 | -2 | 3 |
| 452 | 65.232 | 1.4291 | 3  | -4 | 2 |
| 453 | 65.305 | 1.4277 | -1 | 4  | 6 |
| 454 | 65.328 | 1.4272 | 1  | -5 | 2 |
| 455 | 65.385 | 1.4261 | 5  | 1  | 1 |
| 456 | 65.487 | 1.4242 | -1 | -5 | 2 |
| 457 | 65.529 | 1.4234 | -3 | 3  | 5 |
| 458 | 65.576 | 1.4224 | -3 | 1  | 6 |
| 459 | 65.615 | 1.4217 | -2 | 1  | 7 |



## Supplementary Materials

|     |        |        |    |    |   |
|-----|--------|--------|----|----|---|
| 460 | 65.663 | 1.4208 | 5  | 1  | 0 |
| 461 | 65.746 | 1.4192 | -4 | -1 | 4 |
| 462 | 65.850 | 1.4172 | -5 | 0  | 1 |
| 463 | 65.898 | 1.4163 | 5  | 0  | 2 |
| 464 | 65.901 | 1.4162 | -3 | -4 | 2 |
| 465 | 65.943 | 1.4154 | -1 | 3  | 7 |
| 466 | 65.986 | 1.4146 | -5 | 1  | 0 |
| 467 | 66.044 | 1.4135 | -3 | 0  | 6 |
| 468 | 66.057 | 1.4133 | -2 | -3 | 5 |
| 469 | 66.102 | 1.4124 | 4  | -3 | 2 |
| 470 | 66.196 | 1.4106 | -4 | 2  | 4 |
| 471 | 66.294 | 1.4088 | 5  | -1 | 1 |
| 472 | 66.304 | 1.4086 | -2 | -2 | 6 |
| 473 | 66.315 | 1.4084 | -2 | -5 | 1 |
| 474 | 66.319 | 1.4083 | 4  | 2  | 5 |
| 475 | 66.342 | 1.4079 | 5  | 1  | 2 |
| 476 | 66.349 | 1.4077 | 2  | -1 | 7 |
| 477 | 66.403 | 1.4067 | -3 | -2 | 5 |
| 478 | 66.407 | 1.4066 | -2 | 0  | 7 |
| 479 | 66.479 | 1.4053 | 2  | -5 | 1 |
| 480 | 66.496 | 1.4050 | 4  | 3  | 4 |
| 481 | 66.518 | 1.4046 | -2 | 5  | 3 |
| 482 | 66.674 | 1.4017 | 0  | 5  | 5 |
| 483 | 66.886 | 1.3977 | 3  | 3  | 6 |
| 484 | 66.907 | 1.3973 | -5 | 1  | 1 |
| 485 | 66.940 | 1.3967 | -3 | -3 | 4 |
| 486 | 66.968 | 1.3962 | 0  | -3 | 6 |
| 487 | 67.040 | 1.3949 | 2  | 5  | 4 |
| 488 | 67.055 | 1.3946 | 2  | 4  | 6 |
| 489 | 67.083 | 1.3941 | 0  | 1  | 8 |
| 490 | 67.168 | 1.3926 | -5 | -1 | 1 |
| 491 | 67.191 | 1.3921 | -4 | 3  | 3 |
| 492 | 67.201 | 1.3919 | -2 | 2  | 7 |
| 493 | 67.244 | 1.3912 | -4 | -3 | 2 |
| 494 | 67.341 | 1.3894 | 1  | 5  | 5 |
| 495 | 67.424 | 1.3879 | 2  | 3  | 7 |
| 496 | 67.426 | 1.3878 | 2  | -4 | 4 |
| 497 | 67.484 | 1.3868 | -3 | 2  | 6 |
| 498 | 67.512 | 1.3863 | 4  | -1 | 5 |
| 499 | 67.519 | 1.3862 | 1  | 1  | 8 |
| 500 | 67.757 | 1.3819 | -3 | 4  | 4 |
| 501 | 67.770 | 1.3816 | 1  | -3 | 6 |
| 502 | 67.823 | 1.3807 | 5  | -1 | 2 |
| 503 | 67.842 | 1.3803 | 0  | -2 | 7 |
| 504 | 68.112 | 1.3755 | 3  | 4  | 5 |
| 505 | 68.218 | 1.3736 | 0  | 0  | 8 |
| 506 | 68.280 | 1.3726 | -5 | 0  | 2 |
| 507 | 68.301 | 1.3722 | 0  | 2  | 8 |
| 508 | 68.358 | 1.3712 | 5  | 0  | 3 |
| 509 | 68.398 | 1.3705 | 3  | 1  | 7 |
| 510 | 68.485 | 1.3689 | 5  | 2  | 1 |
| 511 | 68.490 | 1.3689 | 1  | -2 | 7 |
| 512 | 68.497 | 1.3687 | 0  | -5 | 3 |
| 513 | 68.508 | 1.3685 | 5  | 1  | 3 |
| 514 | 68.683 | 1.3655 | 1  | 0  | 8 |
| 515 | 68.703 | 1.3651 | 1  | 2  | 8 |
| 516 | 68.810 | 1.3633 | -2 | -4 | 4 |
| 517 | 68.841 | 1.3627 | -1 | 5  | 5 |
| 518 | 68.864 | 1.3623 | -3 | -1 | 6 |
| 519 | 68.996 | 1.3600 | -1 | -3 | 6 |
| 520 | 69.033 | 1.3594 | -5 | 1  | 2 |
| 521 | 69.043 | 1.3592 | 5  | 2  | 0 |
| 522 | 69.084 | 1.3585 | 0  | -4 | 5 |
| 523 | 69.090 | 1.3584 | 3  | -4 | 3 |
| 524 | 69.135 | 1.3577 | 5  | 2  | 2 |
| 525 | 69.208 | 1.3564 | 4  | 4  | 1 |
| 526 | 69.332 | 1.3543 | 3  | 0  | 7 |
| 527 | 69.356 | 1.3539 | -4 | 1  | 5 |
| 528 | 69.469 | 1.3519 | -1 | 1  | 8 |
| 529 | 69.495 | 1.3515 | -4 | 0  | 5 |
| 530 | 69.506 | 1.3513 | 2  | -5 | 2 |
| 531 | 69.535 | 1.3508 | 4  | -3 | 3 |
| 532 | 69.537 | 1.3508 | -2 | -1 | 7 |
| 533 | 69.563 | 1.3503 | -2 | 5  | 4 |
| 534 | 69.672 | 1.3485 | -5 | 2  | 0 |
| 535 | 69.704 | 1.3480 | 1  | -5 | 3 |
| 536 | 69.744 | 1.3473 | 3  | 5  | 1 |
| 537 | 69.769 | 1.3469 | 3  | 5  | 2 |
| 538 | 69.796 | 1.3464 | 3  | 2  | 7 |
| 539 | 69.811 | 1.3461 | 0  | 4  | 7 |
| 540 | 69.814 | 1.3461 | -2 | -5 | 2 |
| 541 | 69.860 | 1.3453 | -5 | -1 | 2 |
| 542 | 70.006 | 1.3429 | -1 | -2 | 7 |

## Supplementary Materials

|     |        |        |    |    |   |
|-----|--------|--------|----|----|---|
| 543 | 70.022 | 1.3426 | 1  | -4 | 5 |
| 544 | 70.091 | 1.3415 | -1 | -5 | 3 |
| 545 | 70.130 | 1.3408 | 3  | -2 | 6 |
| 546 | 70.216 | 1.3394 | 4  | 4  | 0 |
| 547 | 70.257 | 1.3387 | 5  | -2 | 1 |
| 548 | 70.263 | 1.3386 | 1  | 4  | 7 |
| 549 | 70.276 | 1.3384 | 4  | 1  | 6 |
| 550 | 70.286 | 1.3382 | -5 | 2  | 1 |
| 551 | 70.295 | 1.3381 | -4 | -2 | 4 |
| 552 | 70.386 | 1.3365 | -2 | 4  | 6 |
| 553 | 70.479 | 1.3350 | 0  | 6  | 1 |
| 554 | 70.534 | 1.3341 | 5  | -1 | 3 |
| 555 | 70.555 | 1.3338 | -1 | 0  | 8 |
| 556 | 70.570 | 1.3335 | 0  | 6  | 2 |
| 557 | 70.608 | 1.3329 | 4  | 3  | 5 |
| 558 | 70.628 | 1.3326 | 3  | -3 | 5 |
| 559 | 70.700 | 1.3314 | -1 | 2  | 8 |
| 560 | 70.792 | 1.3299 | 4  | 4  | 3 |
| 561 | 70.796 | 1.3298 | -5 | -2 | 1 |
| 562 | 70.804 | 1.3297 | 2  | 5  | 5 |
| 563 | 70.915 | 1.3279 | 3  | 5  | 0 |
| 564 | 70.936 | 1.3275 | -1 | -4 | 5 |
| 565 | 70.947 | 1.3274 | 4  | 0  | 6 |
| 566 | 70.977 | 1.3269 | 5  | 2  | 3 |
| 567 | 70.989 | 1.3267 | 3  | 5  | 3 |
| 568 | 71.022 | 1.3261 | -4 | 3  | 4 |
| 569 | 71.087 | 1.3251 | -2 | 3  | 7 |
| 570 | 71.143 | 1.3242 | -4 | 4  | 1 |
| 571 | 71.214 | 1.3230 | -4 | 4  | 0 |
| 572 | 71.355 | 1.3208 | 2  | -3 | 6 |
| 573 | 71.379 | 1.3204 | -3 | 5  | 1 |
| 574 | 71.528 | 1.3180 | -4 | 2  | 5 |
| 575 | 71.536 | 1.3179 | 1  | 6  | 2 |
| 576 | 71.561 | 1.3175 | 1  | 6  | 1 |
| 577 | 71.578 | 1.3172 | -4 | -3 | 3 |
| 578 | 71.580 | 1.3172 | 0  | 6  | 0 |
| 579 | 71.655 | 1.3160 | 0  | -1 | 8 |
| 580 | 71.676 | 1.3156 | -3 | 3  | 6 |
| 581 | 71.817 | 1.3134 | 0  | 3  | 8 |
| 582 | 71.831 | 1.3132 | 5  | 1  | 4 |
| 583 | 71.847 | 1.3129 | -3 | 5  | 0 |
| 584 | 71.849 | 1.3129 | 0  | 6  | 3 |
| 585 | 71.858 | 1.3127 | -5 | 0  | 3 |
| 586 | 71.869 | 1.3126 | 0  | 5  | 6 |
| 587 | 71.912 | 1.3119 | 2  | -2 | 7 |
| 588 | 71.924 | 1.3117 | 2  | 0  | 8 |
| 589 | 71.940 | 1.3115 | -4 | -1 | 5 |
| 590 | 71.965 | 1.3111 | 5  | 0  | 4 |
| 591 | 72.027 | 1.3101 | 5  | -2 | 2 |
| 592 | 72.086 | 1.3092 | -5 | 2  | 2 |
| 593 | 72.097 | 1.3090 | -3 | 5  | 2 |
| 594 | 72.134 | 1.3084 | -1 | 4  | 7 |
| 595 | 72.140 | 1.3083 | 1  | -1 | 8 |
| 596 | 72.164 | 1.3079 | -1 | 6  | 1 |
| 597 | 72.179 | 1.3077 | 1  | 3  | 8 |
| 598 | 72.258 | 1.3065 | -4 | 4  | 2 |
| 599 | 72.314 | 1.3056 | -5 | 1  | 3 |
| 600 | 72.361 | 1.3049 | -3 | 4  | 5 |
| 601 | 72.369 | 1.3047 | -1 | 6  | 2 |
| 602 | 72.399 | 1.3043 | 1  | 5  | 6 |
| 603 | 72.403 | 1.3042 | -4 | -4 | 1 |
| 604 | 72.470 | 1.3032 | 4  | -4 | 1 |
| 605 | 72.536 | 1.3021 | 4  | -2 | 5 |
| 606 | 72.693 | 1.2997 | 1  | 6  | 3 |
| 607 | 72.770 | 1.2985 | 1  | 6  | 0 |
| 608 | 73.140 | 1.2929 | -1 | 6  | 0 |
| 609 | 73.196 | 1.2920 | 3  | 4  | 6 |
| 610 | 73.258 | 1.2911 | -3 | -5 | 1 |
| 611 | 73.350 | 1.2897 | 4  | 4  | 4 |
| 612 | 73.380 | 1.2892 | 3  | 5  | 4 |
| 613 | 73.462 | 1.2880 | -3 | 1  | 7 |
| 614 | 73.465 | 1.2879 | 2  | 4  | 7 |
| 615 | 73.467 | 1.2879 | 3  | 3  | 7 |
| 616 | 73.493 | 1.2875 | 3  | -5 | 1 |
| 617 | 73.530 | 1.2870 | -3 | -3 | 5 |
| 618 | 73.652 | 1.2851 | 2  | -5 | 3 |
| 619 | 73.684 | 1.2847 | -5 | -1 | 3 |
| 620 | 73.704 | 1.2844 | 2  | -4 | 5 |
| 621 | 73.707 | 1.2843 | -5 | -2 | 2 |
| 622 | 73.726 | 1.2840 | -2 | 5  | 5 |
| 623 | 73.745 | 1.2838 | -2 | -3 | 6 |
| 624 | 73.750 | 1.2837 | -1 | 6  | 3 |
| 625 | 73.801 | 1.2829 | 5  | 3  | 1 |

## Supplementary Materials

|     |        |        |    |    |   |
|-----|--------|--------|----|----|---|
| 626 | 73.850 | 1.2822 | 0  | -6 | 1 |
| 627 | 73.895 | 1.2815 | 4  | -1 | 6 |
| 628 | 73.911 | 1.2813 | -3 | -2 | 6 |
| 629 | 73.914 | 1.2812 | -1 | -1 | 8 |
| 630 | 73.975 | 1.2803 | 5  | 2  | 4 |
| 631 | 73.987 | 1.2802 | -3 | 5  | 3 |
| 632 | 74.027 | 1.2796 | 3  | -4 | 4 |
| 633 | 74.068 | 1.2790 | 4  | -3 | 4 |
| 634 | 74.071 | 1.2789 | 0  | -5 | 4 |
| 635 | 74.081 | 1.2788 | -1 | 5  | 6 |
| 636 | 74.153 | 1.2777 | 5  | 3  | 2 |
| 637 | 74.185 | 1.2772 | -3 | 0  | 7 |
| 638 | 74.197 | 1.2770 | -1 | 3  | 8 |
| 639 | 74.292 | 1.2756 | 0  | 6  | 4 |
| 640 | 74.374 | 1.2745 | 5  | -1 | 4 |
| 641 | 74.409 | 1.2739 | -2 | -5 | 3 |
| 642 | 74.538 | 1.2720 | -4 | 4  | 3 |
| 643 | 74.556 | 1.2718 | -2 | 1  | 8 |
| 644 | 74.619 | 1.2709 | 5  | 3  | 0 |
| 645 | 74.872 | 1.2672 | -2 | -2 | 7 |
| 646 | 74.888 | 1.2670 | 4  | -4 | 2 |
| 647 | 74.949 | 1.2661 | 5  | -2 | 3 |
| 648 | 75.003 | 1.2653 | -3 | 2  | 7 |
| 649 | 75.012 | 1.2652 | 1  | 6  | 4 |
| 650 | 75.036 | 1.2648 | -5 | 2  | 3 |
| 651 | 75.127 | 1.2635 | 1  | -5 | 4 |
| 652 | 75.139 | 1.2634 | -1 | -6 | 1 |
| 653 | 75.223 | 1.2622 | 2  | 6  | 2 |
| 654 | 75.266 | 1.2615 | 2  | 3  | 8 |
| 655 | 75.278 | 1.2614 | 1  | -6 | 1 |
| 656 | 75.350 | 1.2603 | 2  | -1 | 8 |
| 657 | 75.362 | 1.2602 | 2  | 6  | 1 |
| 658 | 75.491 | 1.2583 | -2 | -4 | 5 |
| 659 | 75.533 | 1.2577 | -5 | 3  | 0 |
| 660 | 75.553 | 1.2575 | 0  | -3 | 7 |
| 661 | 75.582 | 1.2571 | -2 | 0  | 8 |
| 662 | 75.649 | 1.2561 | 2  | 5  | 6 |
| 663 | 75.670 | 1.2558 | 5  | 3  | 3 |
| 664 | 75.728 | 1.2550 | -4 | -4 | 2 |
| 665 | 75.730 | 1.2550 | -1 | -5 | 4 |
| 666 | 75.783 | 1.2542 | -2 | 2  | 8 |
| 667 | 75.783 | 1.2542 | 4  | 3  | 6 |
| 668 | 75.853 | 1.2532 | -5 | 3  | 1 |
| 669 | 75.930 | 1.2522 | -4 | 3  | 5 |
| 670 | 76.021 | 1.2509 | -3 | -4 | 4 |
| 671 | 76.027 | 1.2508 | -4 | 1  | 6 |
| 672 | 76.202 | 1.2484 | 1  | -3 | 7 |
| 673 | 76.247 | 1.2477 | 2  | 6  | 3 |
| 674 | 76.254 | 1.2476 | 5  | 1  | 5 |
| 675 | 76.283 | 1.2472 | -1 | 6  | 4 |
| 676 | 76.286 | 1.2472 | 3  | -5 | 2 |
| 677 | 76.375 | 1.2460 | 5  | -3 | 1 |
| 678 | 76.436 | 1.2451 | -4 | 0  | 6 |
| 679 | 76.526 | 1.2439 | -5 | 0  | 4 |
| 680 | 76.543 | 1.2436 | -2 | 6  | 1 |
| 681 | 76.595 | 1.2429 | -5 | -3 | 1 |
| 682 | 76.600 | 1.2429 | -4 | -2 | 5 |
| 683 | 76.634 | 1.2424 | 3  | 1  | 8 |
| 684 | 76.660 | 1.2420 | 5  | 0  | 5 |
| 685 | 76.661 | 1.2420 | 2  | 6  | 0 |
| 686 | 76.689 | 1.2416 | 0  | -4 | 6 |
| 687 | 76.697 | 1.2415 | -5 | 1  | 4 |
| 688 | 76.732 | 1.2411 | -3 | -5 | 2 |
| 689 | 76.856 | 1.2394 | -2 | 6  | 2 |
| 690 | 76.879 | 1.2390 | 0  | 1  | 9 |
| 691 | 76.900 | 1.2388 | 3  | 5  | 5 |
| 692 | 76.964 | 1.2379 | -4 | -3 | 4 |
| 693 | 77.017 | 1.2372 | -3 | 5  | 4 |
| 694 | 77.032 | 1.2370 | 4  | 4  | 5 |
| 695 | 77.129 | 1.2357 | -2 | 4  | 7 |
| 696 | 77.149 | 1.2354 | -3 | -1 | 7 |
| 697 | 77.170 | 1.2351 | 4  | 1  | 7 |
| 698 | 77.180 | 1.2350 | 1  | 1  | 9 |
| 699 | 77.251 | 1.2340 | 0  | -6 | 2 |
| 700 | 77.266 | 1.2338 | 0  | -2 | 8 |
| 701 | 77.329 | 1.2330 | -5 | 3  | 2 |
| 702 | 77.386 | 1.2322 | -2 | 6  | 0 |
| 703 | 77.478 | 1.2310 | 1  | -4 | 6 |
| 704 | 77.504 | 1.2306 | 0  | 4  | 8 |
| 705 | 77.564 | 1.2298 | 3  | -3 | 6 |
| 706 | 77.598 | 1.2294 | -1 | -3 | 7 |
| 707 | 77.700 | 1.2280 | 3  | 2  | 8 |
| 708 | 77.731 | 1.2276 | -5 | -2 | 3 |

## Supplementary Materials

|     |        |        |    |    |   |
|-----|--------|--------|----|----|---|
| 709 | 77.761 | 1.2272 | 0  | 2  | 9 |
| 710 | 77.769 | 1.2271 | 1  | -2 | 8 |
| 711 | 77.802 | 1.2266 | 3  | 0  | 8 |
| 712 | 77.826 | 1.2263 | 1  | 4  | 8 |
| 713 | 77.854 | 1.2260 | -4 | 2  | 6 |
| 714 | 77.861 | 1.2259 | 0  | 6  | 5 |
| 715 | 77.947 | 1.2247 | -4 | 4  | 4 |
| 716 | 77.962 | 1.2245 | 3  | -2 | 7 |
| 717 | 78.004 | 1.2240 | -3 | 4  | 6 |
| 718 | 78.030 | 1.2236 | 1  | 2  | 9 |
| 719 | 78.067 | 1.2231 | 0  | 5  | 7 |
| 720 | 78.082 | 1.2229 | 5  | 2  | 5 |
| 721 | 78.091 | 1.2228 | 4  | 0  | 7 |
| 722 | 78.228 | 1.2210 | 0  | 0  | 9 |
| 723 | 78.321 | 1.2198 | -2 | 6  | 3 |
| 724 | 78.366 | 1.2192 | 5  | -3 | 2 |
| 725 | 78.429 | 1.2184 | 4  | -4 | 3 |
| 726 | 78.458 | 1.2180 | 1  | 6  | 5 |
| 727 | 78.470 | 1.2179 | 1  | 5  | 7 |
| 728 | 78.476 | 1.2178 | 4  | 2  | 7 |
| 729 | 78.547 | 1.2169 | 1  | -6 | 2 |
| 730 | 78.557 | 1.2167 | 1  | 0  | 9 |
| 731 | 78.583 | 1.2164 | -1 | -4 | 6 |
| 732 | 78.585 | 1.2164 | -5 | -1 | 4 |
| 733 | 78.634 | 1.2157 | -1 | -6 | 2 |
| 734 | 78.762 | 1.2141 | -3 | 3  | 7 |
| 735 | 78.831 | 1.2132 | -2 | -1 | 8 |
| 736 | 78.861 | 1.2128 | 2  | -5 | 4 |
| 737 | 78.919 | 1.2121 | 4  | 5  | 2 |
| 738 | 78.952 | 1.2116 | -2 | 5  | 6 |
| 739 | 78.981 | 1.2113 | 5  | -2 | 4 |
| 740 | 79.007 | 1.2109 | 4  | 5  | 1 |
| 741 | 79.027 | 1.2107 | 4  | -2 | 6 |
| 742 | 79.071 | 1.2101 | -4 | -1 | 6 |
| 743 | 79.095 | 1.2098 | -5 | 2  | 4 |
| 744 | 79.102 | 1.2097 | -2 | -6 | 1 |
| 745 | 79.229 | 1.2081 | -2 | 3  | 8 |
| 746 | 79.257 | 1.2077 | -1 | 1  | 9 |
| 747 | 79.291 | 1.2073 | 5  | -1 | 5 |
| 748 | 79.295 | 1.2073 | 3  | 4  | 7 |
| 749 | 79.375 | 1.2062 | 2  | -6 | 1 |
| 750 | 79.440 | 1.2054 | -1 | -2 | 8 |
| 751 | 79.527 | 1.2043 | 2  | -3 | 7 |
| 752 | 79.646 | 1.2028 | 4  | -3 | 5 |
| 753 | 79.701 | 1.2021 | -5 | -3 | 2 |
| 754 | 79.703 | 1.2021 | 6  | 0  | 1 |
| 755 | 79.800 | 1.2009 | 6  | 0  | 0 |
| 756 | 79.855 | 1.2002 | -1 | 4  | 8 |
| 757 | 79.935 | 1.1992 | -1 | 6  | 5 |
| 758 | 79.942 | 1.1991 | -5 | 3  | 3 |
| 759 | 79.977 | 1.1987 | 4  | 5  | 3 |
| 760 | 79.990 | 1.1985 | 3  | -4 | 5 |
| 761 | 80.048 | 1.1978 | -2 | -5 | 4 |
| 762 | 80.150 | 1.1965 | -4 | -4 | 3 |
| 763 | 80.150 | 1.1965 | 2  | 1  | 9 |
| 764 | 80.161 | 1.1964 | -1 | 2  | 9 |
| 765 | 80.192 | 1.1960 | 3  | -5 | 3 |
| 766 | 80.240 | 1.1954 | 4  | 5  | 0 |
| 767 | 80.332 | 1.1943 | -1 | 5  | 7 |
| 768 | 80.358 | 1.1939 | 6  | 1  | 1 |
| 769 | 80.565 | 1.1914 | -1 | 0  | 9 |
| 770 | 80.638 | 1.1905 | 0  | -5 | 5 |
| 771 | 80.725 | 1.1894 | 6  | 1  | 0 |
| 772 | 80.749 | 1.1891 | 6  | 0  | 2 |
| 773 | 80.812 | 1.1884 | 2  | 4  | 8 |
| 774 | 80.852 | 1.1879 | 0  | 3  | 9 |
| 775 | 80.920 | 1.1871 | -2 | 6  | 4 |
| 776 | 80.928 | 1.1870 | 2  | -4 | 6 |
| 777 | 80.934 | 1.1869 | 2  | -2 | 8 |
| 778 | 80.962 | 1.1865 | 2  | 2  | 9 |
| 779 | 80.973 | 1.1864 | 3  | 3  | 8 |
| 780 | 81.039 | 1.1856 | -6 | 0  | 1 |
| 781 | 81.044 | 1.1855 | -3 | -3 | 6 |
| 782 | 81.083 | 1.1851 | -6 | 1  | 0 |
| 783 | 81.089 | 1.1850 | 1  | 3  | 9 |
| 784 | 81.094 | 1.1849 | -4 | 5  | 1 |
| 785 | 81.131 | 1.1845 | 6  | 1  | 2 |
| 786 | 81.153 | 1.1842 | -3 | 5  | 5 |
| 787 | 81.174 | 1.1840 | 3  | -1 | 8 |
| 788 | 81.187 | 1.1838 | 5  | 4  | 1 |
| 789 | 81.220 | 1.1834 | 4  | -1 | 7 |
| 790 | 81.257 | 1.1830 | 6  | -1 | 1 |
| 791 | 81.259 | 1.1830 | 5  | 4  | 2 |

## Supplementary Materials

|     |        |        |    |    |   |
|-----|--------|--------|----|----|---|
| 792 | 81.297 | 1.1825 | -3 | -5 | 3 |
| 793 | 81.433 | 1.1809 | -4 | 5  | 0 |
| 794 | 81.483 | 1.1803 | 5  | -3 | 3 |
| 795 | 81.508 | 1.1800 | 3  | 6  | 2 |
| 796 | 81.510 | 1.1799 | 3  | 5  | 6 |
| 797 | 81.531 | 1.1797 | 2  | 5  | 7 |
| 798 | 81.544 | 1.1795 | 2  | 0  | 9 |
| 799 | 81.558 | 1.1794 | 1  | -5 | 5 |
| 800 | 81.711 | 1.1775 | 2  | 6  | 5 |
| 801 | 81.734 | 1.1773 | 5  | 1  | 6 |
| 802 | 81.746 | 1.1771 | 0  | -6 | 3 |
| 803 | 81.755 | 1.1770 | 3  | 6  | 1 |
| 804 | 81.777 | 1.1768 | 0  | -1 | 9 |
| 805 | 81.800 | 1.1765 | 4  | 4  | 6 |
| 806 | 81.874 | 1.1756 | -4 | 3  | 6 |
| 807 | 81.894 | 1.1754 | -4 | 5  | 2 |
| 808 | 81.981 | 1.1744 | 4  | 3  | 7 |
| 809 | 82.048 | 1.1736 | -6 | 1  | 1 |
| 810 | 82.102 | 1.1729 | 5  | 3  | 5 |
| 811 | 82.133 | 1.1726 | 1  | -1 | 9 |
| 812 | 82.140 | 1.1725 | -5 | 1  | 5 |
| 813 | 82.169 | 1.1721 | 4  | 5  | 4 |
| 814 | 82.174 | 1.1721 | -3 | 1  | 8 |
| 815 | 82.231 | 1.1714 | -6 | -1 | 1 |
| 816 | 82.242 | 1.1713 | -5 | 0  | 5 |
| 817 | 82.253 | 1.1712 | 5  | 4  | 0 |
| 818 | 82.280 | 1.1708 | -2 | -3 | 7 |
| 819 | 82.282 | 1.1708 | -3 | -2 | 7 |
| 820 | 82.368 | 1.1698 | -1 | -5 | 5 |
| 821 | 82.399 | 1.1695 | 3  | 6  | 3 |
| 822 | 82.403 | 1.1694 | 5  | 0  | 6 |
| 823 | 82.451 | 1.1688 | -4 | 4  | 5 |
| 824 | 82.469 | 1.1686 | 5  | 4  | 3 |
| 825 | 82.488 | 1.1684 | 2  | -6 | 2 |
| 826 | 82.520 | 1.1680 | 0  | 6  | 6 |
| 827 | 82.569 | 1.1675 | 6  | -1 | 2 |
| 828 | 82.604 | 1.1671 | -3 | -4 | 5 |
| 829 | 82.605 | 1.1671 | -4 | -5 | 1 |
| 830 | 82.660 | 1.1664 | -2 | -6 | 2 |
| 831 | 82.830 | 1.1645 | -5 | -2 | 4 |
| 832 | 82.907 | 1.1636 | 4  | -5 | 1 |
| 833 | 82.914 | 1.1635 | 1  | -6 | 3 |
| 834 | 82.929 | 1.1633 | 6  | 0  | 3 |
| 835 | 83.039 | 1.1621 | 6  | 1  | 3 |
| 836 | 83.063 | 1.1618 | 4  | -4 | 4 |
| 837 | 83.111 | 1.1612 | -2 | -4 | 6 |
| 838 | 83.137 | 1.1609 | 3  | 6  | 0 |
| 839 | 83.143 | 1.1609 | -3 | 0  | 8 |
| 840 | 83.209 | 1.1601 | 6  | 2  | 1 |
| 841 | 83.221 | 1.1600 | -1 | -6 | 3 |
| 842 | 83.261 | 1.1595 | -1 | 3  | 9 |
| 843 | 83.262 | 1.1595 | 5  | 2  | 6 |
| 844 | 83.370 | 1.1583 | -4 | -3 | 5 |
| 845 | 83.399 | 1.1580 | -3 | 2  | 8 |
| 846 | 83.408 | 1.1579 | -6 | 0  | 2 |
| 847 | 83.440 | 1.1575 | -5 | 4  | 0 |
| 848 | 83.483 | 1.1570 | -5 | 4  | 1 |
| 849 | 83.487 | 1.1570 | -3 | 6  | 1 |
| 850 | 83.643 | 1.1552 | -4 | 1  | 7 |
| 851 | 83.669 | 1.1549 | -5 | 3  | 4 |
| 852 | 83.709 | 1.1545 | 6  | 2  | 2 |
| 853 | 83.827 | 1.1531 | -4 | 5  | 3 |
| 854 | 83.843 | 1.1529 | 6  | 2  | 0 |
| 855 | 83.878 | 1.1526 | -4 | -2 | 6 |
| 856 | 83.904 | 1.1523 | -3 | 6  | 2 |
| 857 | 83.911 | 1.1522 | -5 | -3 | 3 |
| 858 | 83.967 | 1.1516 | 2  | 3  | 9 |
| 859 | 84.062 | 1.1505 | -1 | -1 | 9 |
| 860 | 84.092 | 1.1502 | 5  | -2 | 5 |
| 861 | 84.143 | 1.1496 | -6 | 1  | 2 |
| 862 | 84.203 | 1.1489 | -3 | 6  | 0 |
| 863 | 84.238 | 1.1486 | -2 | -2 | 8 |
| 864 | 84.256 | 1.1483 | -2 | 1  | 9 |
| 865 | 84.311 | 1.1477 | -4 | 0  | 7 |
| 866 | 84.421 | 1.1465 | 3  | 6  | 4 |
| 867 | 84.449 | 1.1462 | -5 | -4 | 1 |
| 868 | 84.530 | 1.1453 | 5  | -4 | 1 |
| 869 | 84.536 | 1.1453 | -5 | -1 | 5 |
| 870 | 84.549 | 1.1451 | 0  | 7  | 2 |
| 871 | 84.554 | 1.1451 | -6 | 2  | 0 |
| 872 | 84.633 | 1.1442 | -2 | 6  | 5 |
| 873 | 84.657 | 1.1439 | -5 | 4  | 2 |
| 874 | 84.663 | 1.1439 | -3 | 4  | 7 |

## Supplementary Materials

|     |        |        |    |    |    |
|-----|--------|--------|----|----|----|
| 875 | 84.678 | 1.1437 | -1 | 6  | 6  |
| 876 | 84.732 | 1.1431 | 0  | 7  | 1  |
| 877 | 84.807 | 1.1423 | 5  | 4  | 4  |
| 878 | 84.826 | 1.1421 | -2 | 4  | 8  |
| 879 | 84.862 | 1.1417 | -6 | -1 | 2  |
| 880 | 84.946 | 1.1408 | 0  | -3 | 8  |
| 881 | 84.995 | 1.1402 | 6  | -2 | 1  |
| 882 | 85.007 | 1.1401 | 6  | -1 | 3  |
| 883 | 85.010 | 1.1401 | 4  | 1  | 8  |
| 884 | 85.110 | 1.1390 | 2  | -5 | 5  |
| 885 | 85.123 | 1.1389 | 2  | -1 | 9  |
| 886 | 85.162 | 1.1384 | -4 | 2  | 7  |
| 887 | 85.179 | 1.1382 | -2 | 2  | 9  |
| 888 | 85.183 | 1.1382 | 3  | -5 | 4  |
| 889 | 85.191 | 1.1381 | 0  | -4 | 7  |
| 890 | 85.217 | 1.1378 | -2 | 5  | 7  |
| 891 | 85.243 | 1.1376 | -6 | 2  | 1  |
| 892 | 85.257 | 1.1374 | 0  | 5  | 8  |
| 893 | 85.260 | 1.1374 | 5  | -1 | 6  |
| 894 | 85.339 | 1.1365 | 6  | 2  | 3  |
| 895 | 85.437 | 1.1355 | 1  | 7  | 2  |
| 896 | 85.449 | 1.1353 | 3  | -3 | 7  |
| 897 | 85.451 | 1.1353 | -3 | 6  | 3  |
| 898 | 85.468 | 1.1351 | 1  | -3 | 8  |
| 899 | 85.481 | 1.1350 | 4  | 5  | 5  |
| 900 | 85.497 | 1.1348 | 0  | 7  | 3  |
| 901 | 85.508 | 1.1347 | 4  | -5 | 2  |
| 902 | 85.520 | 1.1346 | -2 | 0  | 9  |
| 903 | 85.543 | 1.1343 | 1  | 5  | 8  |
| 904 | 85.607 | 1.1337 | -6 | -2 | 1  |
| 905 | 85.644 | 1.1333 | -4 | -4 | 4  |
| 906 | 85.645 | 1.1332 | -3 | -6 | 1  |
| 907 | 85.705 | 1.1326 | 5  | -3 | 4  |
| 908 | 85.727 | 1.1324 | 3  | 1  | 9  |
| 909 | 85.730 | 1.1323 | 1  | 7  | 1  |
| 910 | 85.853 | 1.1310 | 1  | -4 | 7  |
| 911 | 86.022 | 1.1292 | 4  | 2  | 8  |
| 912 | 86.045 | 1.1290 | 0  | 7  | 0  |
| 913 | 86.048 | 1.1290 | 3  | -6 | 1  |
| 914 | 86.069 | 1.1287 | 6  | 1  | 4  |
| 915 | 86.087 | 1.1286 | -4 | -5 | 2  |
| 916 | 86.102 | 1.1284 | 0  | 4  | 9  |
| 917 | 86.107 | 1.1283 | 2  | 6  | 6  |
| 918 | 86.181 | 1.1276 | 4  | 0  | 8  |
| 919 | 86.227 | 1.1271 | 6  | 0  | 4  |
| 920 | 86.257 | 1.1268 | 4  | -3 | 6  |
| 921 | 86.273 | 1.1266 | 1  | 7  | 3  |
| 922 | 86.290 | 1.1264 | -1 | 7  | 2  |
| 923 | 86.296 | 1.1264 | -3 | -1 | 8  |
| 924 | 86.307 | 1.1262 | 1  | 4  | 9  |
| 925 | 86.363 | 1.1257 | -1 | 7  | 1  |
| 926 | 86.372 | 1.1256 | -3 | 5  | 6  |
| 927 | 86.402 | 1.1253 | 3  | 4  | 8  |
| 928 | 86.500 | 1.1242 | 3  | 2  | 9  |
| 929 | 86.508 | 1.1241 | 4  | -2 | 7  |
| 930 | 86.565 | 1.1236 | 6  | -2 | 2  |
| 931 | 86.700 | 1.1221 | 3  | -2 | 8  |
| 932 | 86.707 | 1.1221 | 2  | -6 | 3  |
| 933 | 86.719 | 1.1219 | -2 | -5 | 5  |
| 934 | 86.746 | 1.1217 | 5  | -4 | 2  |
| 935 | 86.805 | 1.1211 | -3 | 3  | 8  |
| 936 | 86.881 | 1.1203 | -4 | 5  | 4  |
| 937 | 86.894 | 1.1201 | -6 | 0  | 3  |
| 938 | 86.937 | 1.1197 | -3 | -5 | 4  |
| 939 | 86.958 | 1.1195 | -5 | 4  | 3  |
| 940 | 86.968 | 1.1194 | 5  | 3  | 6  |
| 941 | 86.973 | 1.1193 | 3  | -4 | 6  |
| 942 | 87.051 | 1.1185 | -1 | -3 | 8  |
| 943 | 87.060 | 1.1184 | -6 | 2  | 2  |
| 944 | 87.135 | 1.1177 | 3  | 0  | 9  |
| 945 | 87.150 | 1.1175 | 1  | 7  | 0  |
| 946 | 87.156 | 1.1174 | -1 | -4 | 7  |
| 947 | 87.162 | 1.1174 | -4 | -1 | 7  |
| 948 | 87.194 | 1.1171 | 3  | 5  | 7  |
| 949 | 87.318 | 1.1158 | -2 | -6 | 3  |
| 950 | 87.319 | 1.1158 | 0  | -6 | 4  |
| 951 | 87.346 | 1.1155 | -1 | 7  | 3  |
| 952 | 87.358 | 1.1154 | -6 | 1  | 3  |
| 953 | 87.423 | 1.1147 | 0  | 1  | 10 |
| 954 | 87.477 | 1.1142 | 0  | -2 | 9  |
| 955 | 87.563 | 1.1133 | 3  | 6  | 5  |
| 956 | 87.563 | 1.1133 | -1 | 7  | 0  |
| 957 | 87.571 | 1.1132 | 0  | 7  | 4  |

## Supplementary Materials

|      |        |        |    |    |    |
|------|--------|--------|----|----|----|
| 958  | 87.596 | 1.1130 | -1 | 5  | 8  |
| 959  | 87.607 | 1.1129 | 1  | 1  | 10 |
| 960  | 87.638 | 1.1125 | 4  | 4  | 7  |
| 961  | 87.764 | 1.1113 | -5 | -4 | 2  |
| 962  | 87.858 | 1.1103 | 1  | -2 | 9  |
| 963  | 88.016 | 1.1087 | 0  | 2  | 10 |
| 964  | 88.035 | 1.1085 | -4 | 4  | 6  |
| 965  | 88.092 | 1.1080 | 6  | 2  | 4  |
| 966  | 88.122 | 1.1077 | -3 | 6  | 4  |
| 967  | 88.170 | 1.1072 | 1  | 2  | 10 |
| 968  | 88.210 | 1.1068 | 0  | -5 | 6  |
| 969  | 88.224 | 1.1067 | 6  | 3  | 1  |
| 970  | 88.236 | 1.1065 | 1  | 7  | 4  |
| 971  | 88.257 | 1.1063 | 0  | 6  | 7  |
| 972  | 88.263 | 1.1063 | 5  | 4  | 5  |
| 973  | 88.266 | 1.1062 | 5  | 1  | 7  |
| 974  | 88.281 | 1.1061 | -2 | 3  | 9  |
| 975  | 88.368 | 1.1052 | 1  | -6 | 4  |
| 976  | 88.451 | 1.1044 | 2  | 5  | 8  |
| 977  | 88.482 | 1.1041 | 0  | -7 | 1  |
| 978  | 88.493 | 1.1040 | -6 | -2 | 2  |
| 979  | 88.495 | 1.1040 | -5 | 3  | 5  |
| 980  | 88.520 | 1.1037 | -1 | 4  | 9  |
| 981  | 88.564 | 1.1033 | 6  | -1 | 4  |
| 982  | 88.610 | 1.1028 | -6 | -1 | 3  |
| 983  | 88.613 | 1.1028 | 2  | -3 | 8  |
| 984  | 88.622 | 1.1027 | 1  | 6  | 7  |
| 985  | 88.640 | 1.1025 | -5 | 1  | 6  |
| 986  | 88.778 | 1.1012 | 4  | -4 | 5  |
| 987  | 88.858 | 1.1004 | -4 | 3  | 7  |
| 988  | 88.892 | 1.1001 | -1 | -6 | 4  |
| 989  | 88.945 | 1.0995 | 2  | 7  | 2  |
| 990  | 88.960 | 1.0994 | -2 | -1 | 9  |
| 991  | 88.999 | 1.0990 | -5 | -2 | 5  |
| 992  | 89.008 | 1.0989 | -5 | 0  | 6  |
| 993  | 89.009 | 1.0989 | 1  | -5 | 6  |
| 994  | 89.009 | 1.0989 | 0  | 0  | 10 |
| 995  | 89.015 | 1.0989 | 3  | -6 | 2  |
| 996  | 89.122 | 1.0978 | 6  | 3  | 0  |
| 997  | 89.134 | 1.0977 | 2  | 4  | 9  |
| 998  | 89.135 | 1.0977 | 2  | -4 | 7  |
| 999  | 89.196 | 1.0971 | 5  | 0  | 7  |
| 1000 | 89.212 | 1.0969 | 4  | 3  | 8  |
| 1001 | 89.214 | 1.0969 | -5 | -3 | 4  |
| 1002 | 89.221 | 1.0968 | 1  | 0  | 10 |
| 1003 | 89.226 | 1.0968 | 4  | -5 | 3  |
| 1004 | 89.258 | 1.0965 | 6  | -2 | 3  |
| 1005 | 89.271 | 1.0964 | -3 | -6 | 2  |
| 1006 | 89.347 | 1.0956 | 2  | 7  | 1  |
| 1007 | 89.450 | 1.0946 | -2 | 6  | 6  |
| 1008 | 89.451 | 1.0946 | 3  | 3  | 9  |
| 1009 | 89.514 | 1.0940 | 5  | 2  | 7  |
| 1010 | 89.526 | 1.0939 | -1 | 7  | 4  |
| 1011 | 89.529 | 1.0939 | 4  | -1 | 8  |
| 1012 | 89.531 | 1.0939 | -3 | -3 | 7  |
| 1013 | 89.670 | 1.0925 | 2  | 7  | 3  |
| 1014 | 89.696 | 1.0923 | -1 | -7 | 1  |
| 1015 | 89.716 | 1.0921 | -1 | -2 | 9  |
| 1016 | 89.860 | 1.0907 | -1 | 1  | 10 |
| 1017 | 89.889 | 1.0904 | 1  | -7 | 1  |
| 1018 | 90.000 | 1.0894 | -6 | 2  | 3  |

## References

1. D. D. Perrin, W. L. F. Armango, D. R. Perrin, *Purification of laboratory Chemicals*, Pergamon. Oxford, U.K. 1986.
2. R. Pandey, P. Kumar, A. K. Singh, M. Shahid, P. Li, S. K. Singh, Q. Xu, A. Misra and D. S. Pandey, *Inorg. Chem.*, 2011, **50**, 3189–3197.
3. R. Pandey, R. K. Gupta, M. Shahid, B. Maiti, A. Misra and D. S. Pandey, *Inorg. Chem.*, 2012, **51**, 298–311.
4. J. C. R. Reis, I. M. S. Lampreia, Â. F. S. Santos, M. L. C. J. Moita and G. Douhéret, *ChemPhysChem*, 2010, **11**, 3722–3733.
5. L. P. Safonova, A. A. Pryahin, J. A. Fadeeva and L. E. Shmukler, *J. Chem. Eng. Data*, 2008, **53**, 1381–1386.
6. C. Della Volpe, G. Guarino, R. Sartorio and V. Vitagilano, *J. Chem. Eng. Data*, 1986, **31**, 37–40.

## Supplementary Materials

7. K. Temizkan and İ. Kaya, *Mater. Sci. Eng. B*, 2020, **252**, 114483.
